# Supplementary material for: Spatial gradients in the characteristics of soil-carbon fractions are associated with abiotic features but not microbial communities
Source: Copernicus journal article supplement (doi:10.5194/bg-16-3911-2019), 2019-10-10
Supplement: Supplementary file 1 [file bg-16-3911-2019-supplement.pdf]

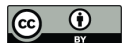

## *Supplement of*

# **Spatial gradients in the characteristics of soil-carbon fractions are associated with abiotic features but not microbial communities**

**Aditi Sengupta et al.**

*Correspondence to:* Aditi Sengupta ([aditi.sengupta@pnnl.gov](mailto:aditi.sengupta@pnnl.gov))

The copyright of individual parts of the supplement might differ from the CC BY 4.0 License.

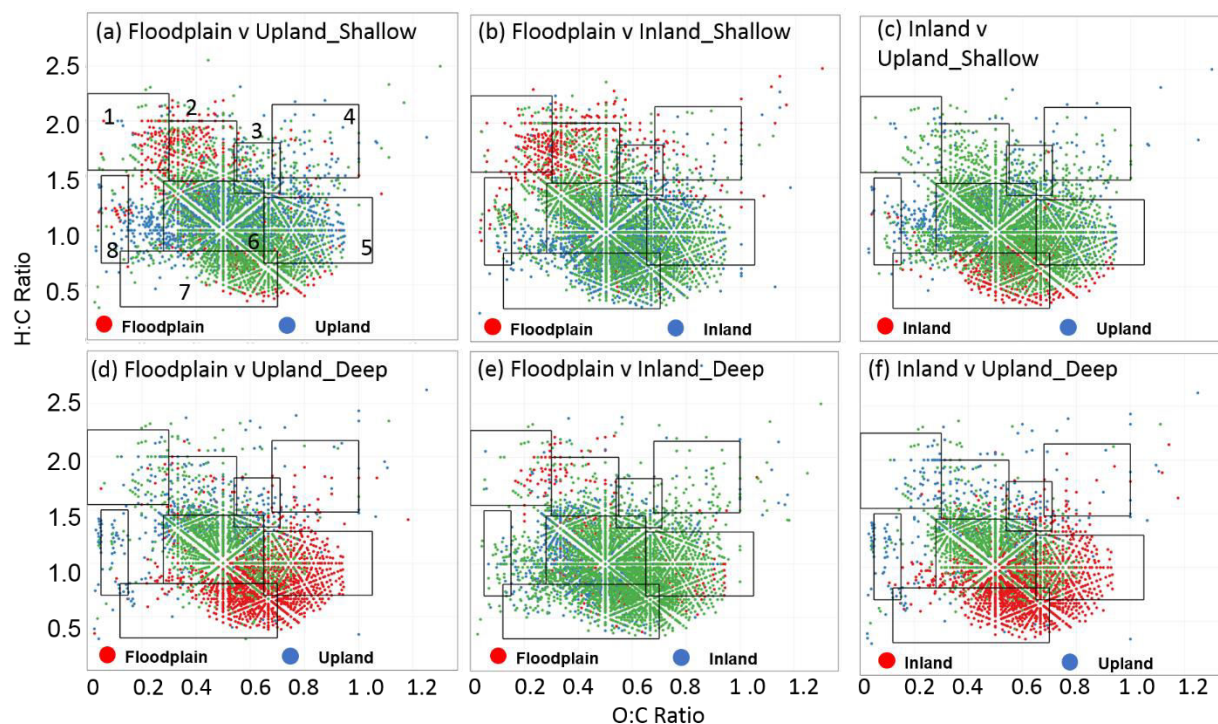

**Figure S1.** van Krevelen diagrams (O : C vs. H : C ratio plot) of unique versus shared peaks observed in water-fraction samples grouped according to their landscape position and depth. Floodplain locations include BC2, BC3, BC12, and BC13. Inland locations include BC4 and BC14. Terrestrial end-member indicates BC15 site. Red and blue dots indicate unique peaks while green indicates peaks observed in both sample groups. The compound classes are numbered as follows: 1) Lipid-like, 2) Protein-like, 3) Amino Sugar-like, 4) Carbohydrate-like, 5) Tannin-like, 6) Lignin-like, 7) Condensed Hydrocarbon-like, and 8) Unsaturated Hydrocarbon-like. Compound classes are reported on counts of C, H, and O for the following H:C and O:C ranges; lipids ( $0 < \text{O:C} \leq 0.3$ ,  $1.5 \leq \text{H:C} \leq 2.5$ ), unsaturated hydrocarbons ( $0 \leq \text{O:C} \leq 0.125$ ,  $0.8 \leq \text{H:C} < 2.5$ ), proteins ( $0.3 < \text{O:C} \leq 0.55$ ,  $1.5 \leq \text{H:C} \leq 2.3$ ), amino sugars ( $0.55 < \text{O:C} \leq 0.7$ ,  $1.5 \leq \text{H:C} \leq 2.2$ ), carbohydrates ( $0.7 < \text{O:C} \leq 1.5$ ,  $1.5 \leq \text{H:C} \leq 2.5$ ), lignin ( $0.125 < \text{O:C} \leq 0.65$ ,  $0.8 \leq \text{H:C} < 1.5$ ), tannins ( $0.65 < \text{O:C} \leq 1.1$ ,  $0.8 \leq \text{H:C} < 1.5$ ), and condensed hydrocarbons ( $0 \leq \text{O:C} \leq 0.95$ ,  $0.2 \leq \text{H:C} < 0.8$ ). Unnamed compounds are calculated as the proportion of identified C that does not fit within the above defined H:C and O:C ranges

Figure S2 BetaNTI metric regressed against soil environmental variables

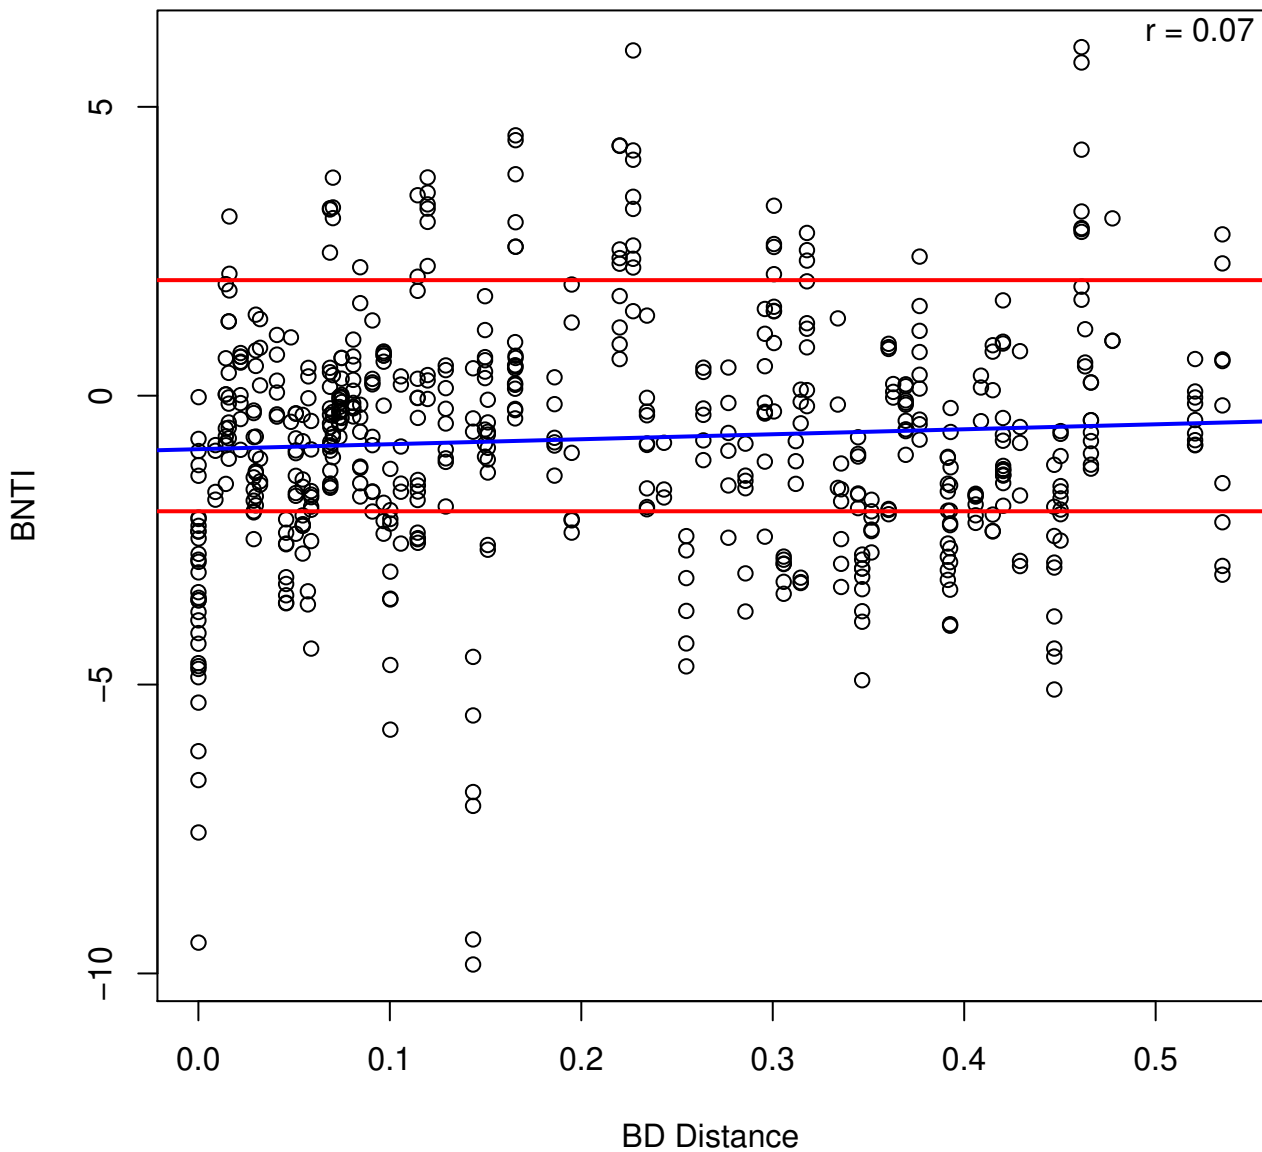

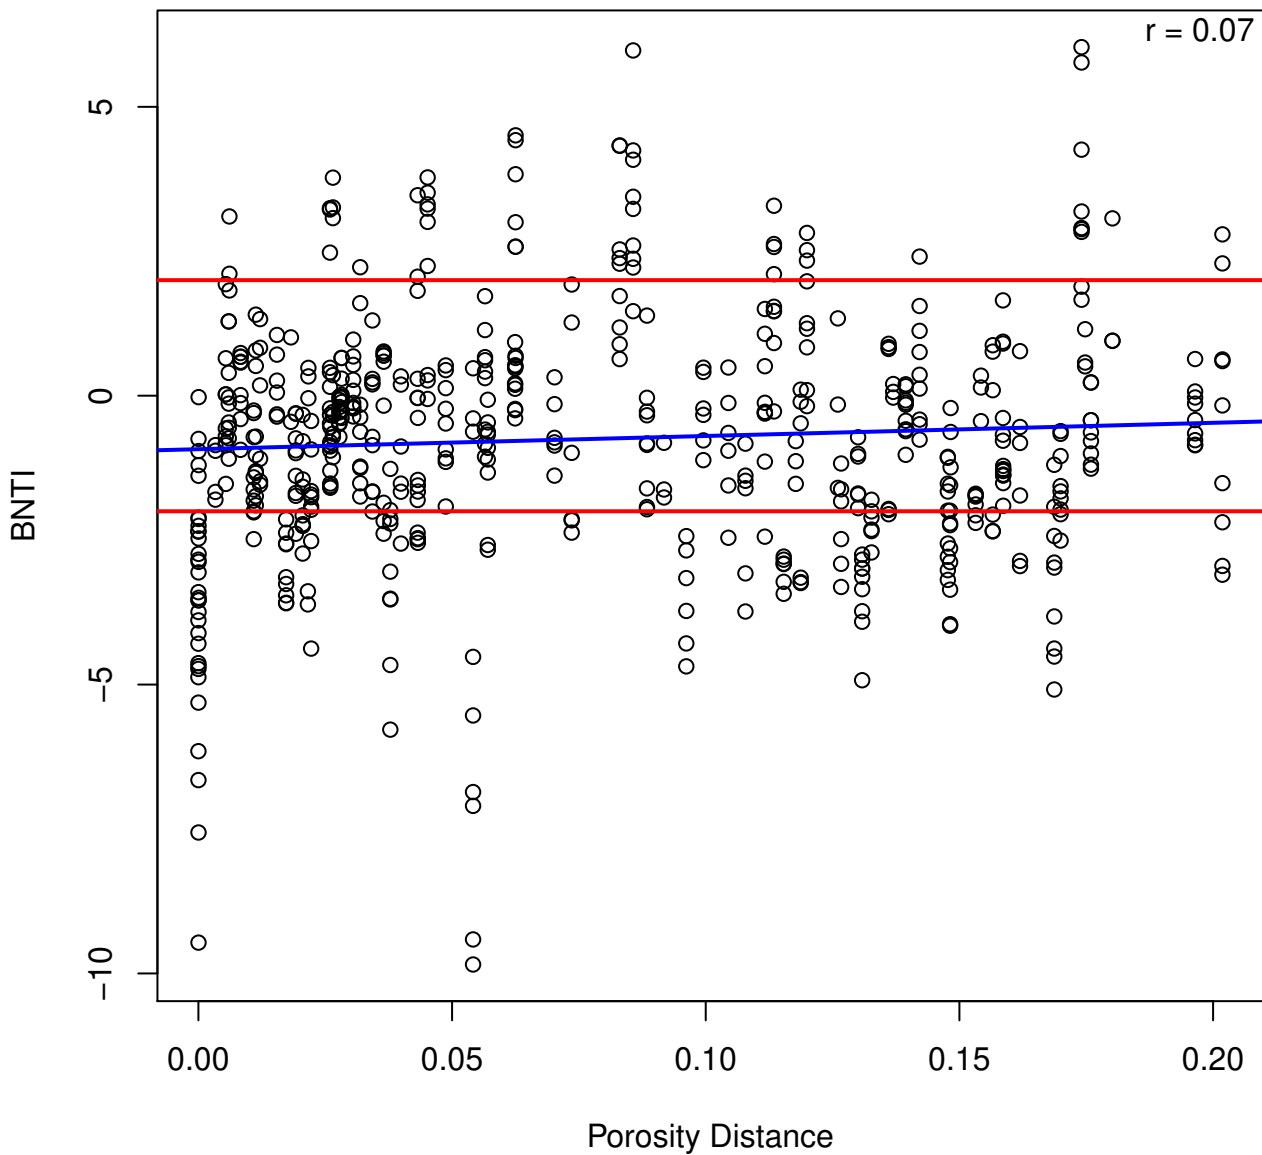

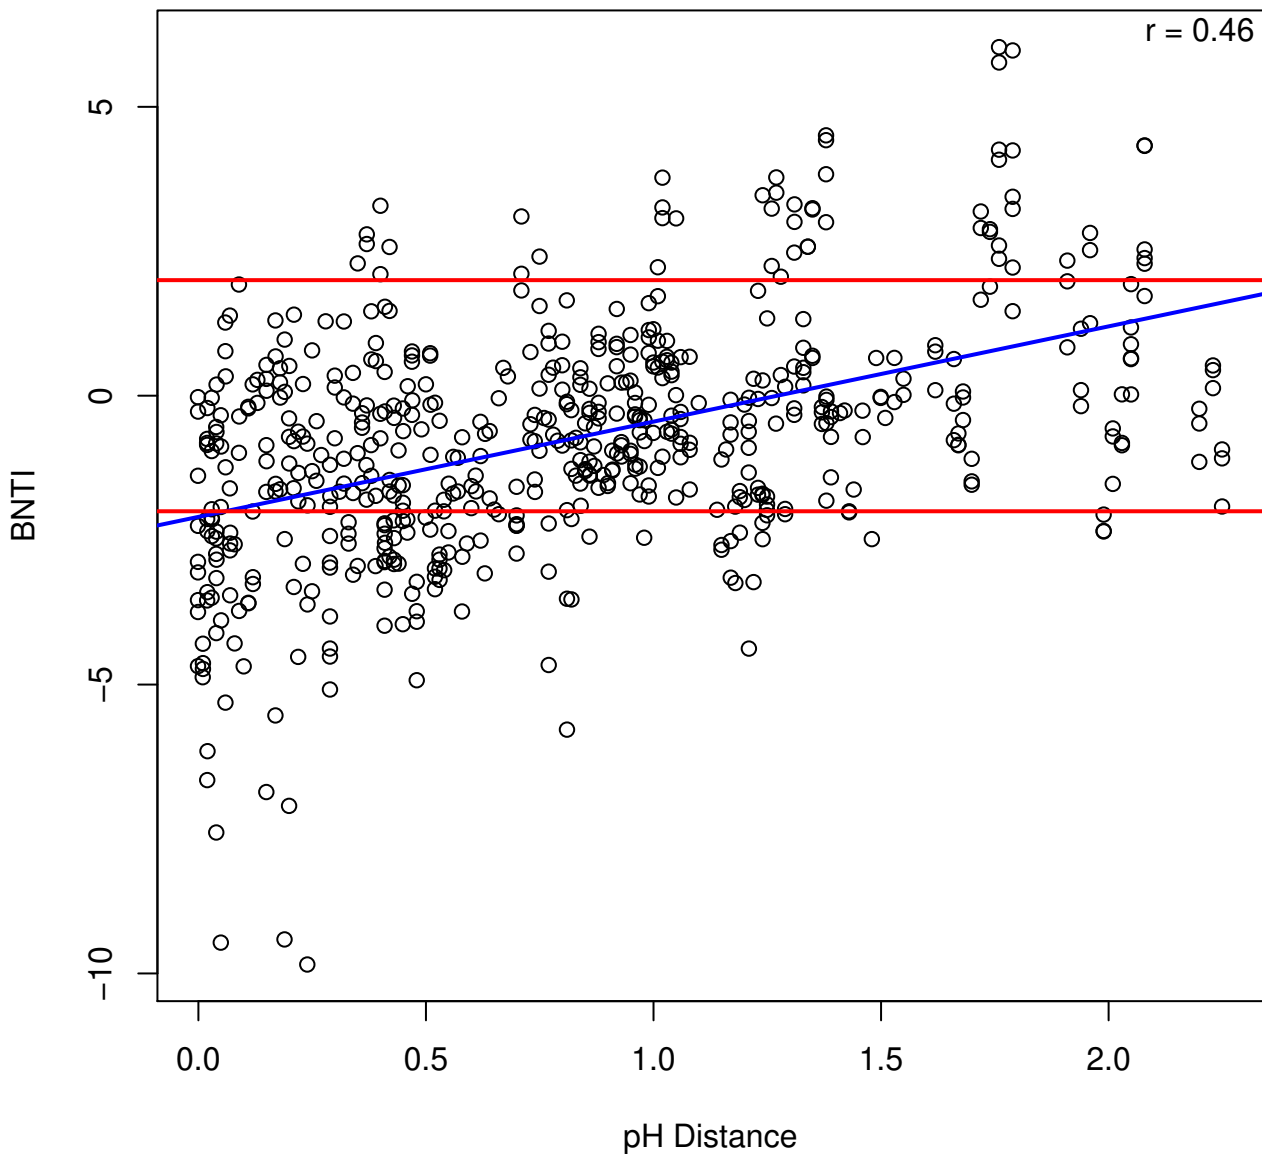

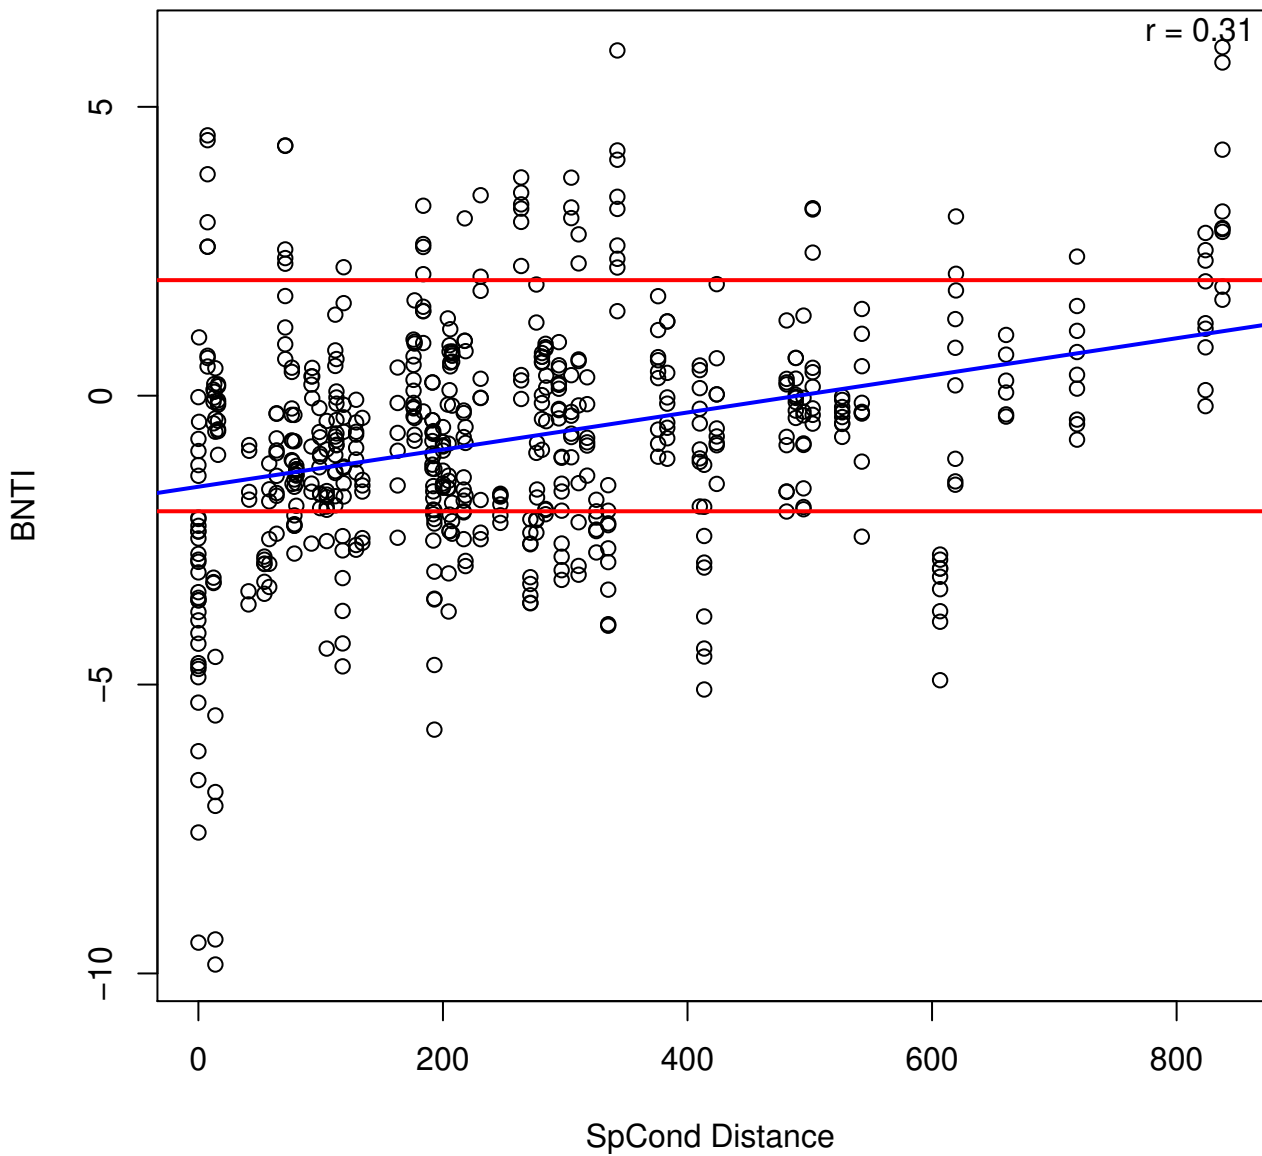

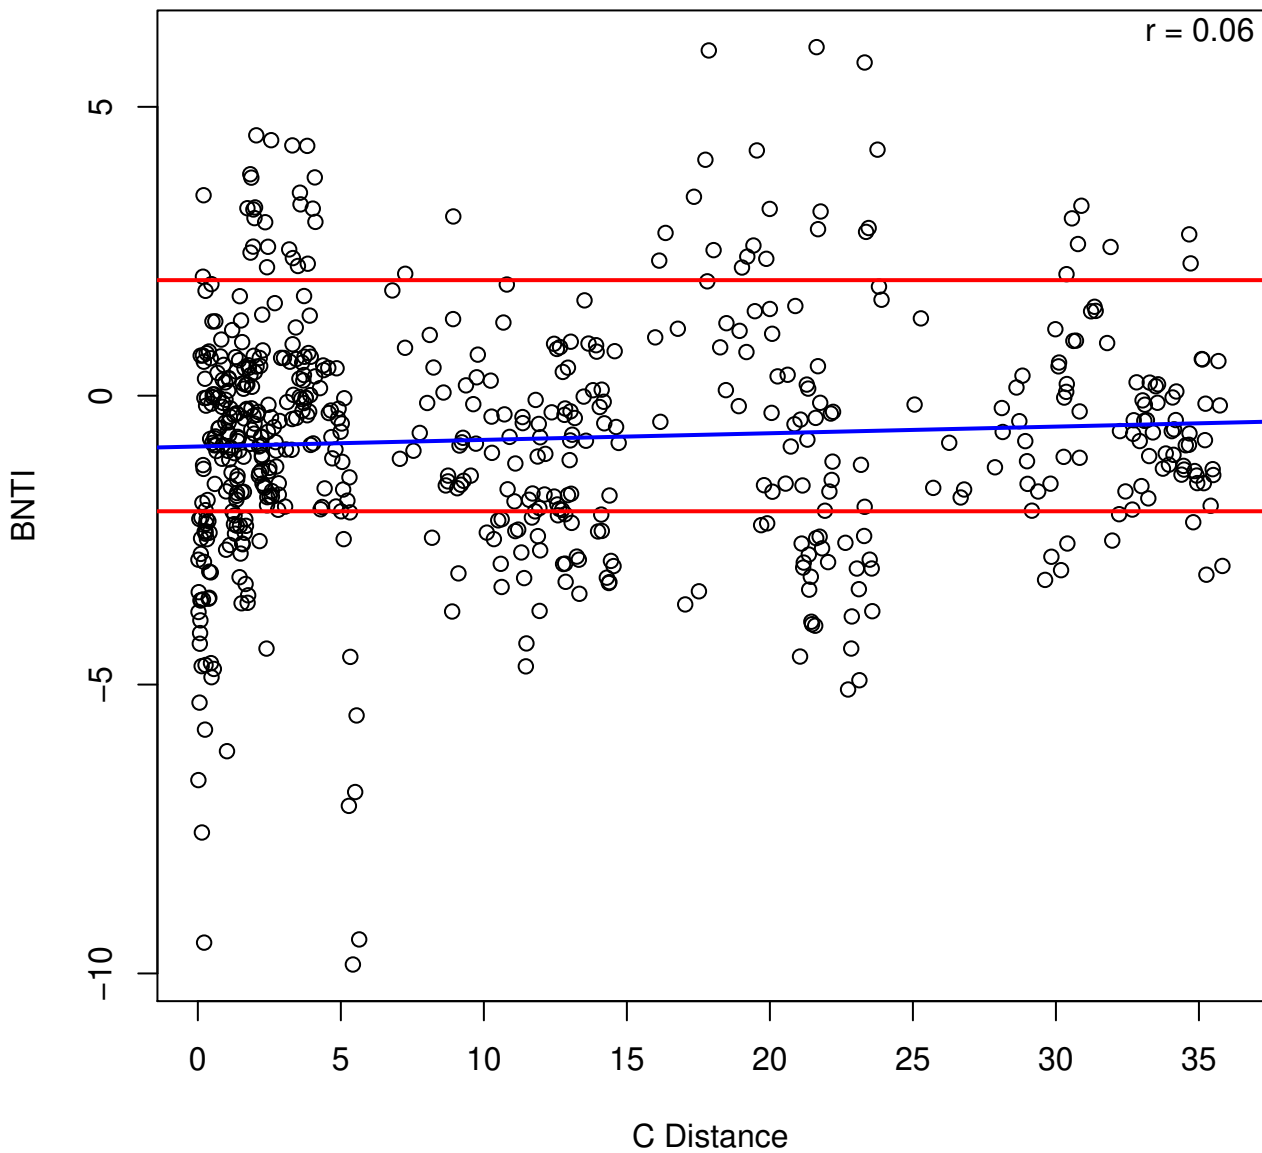

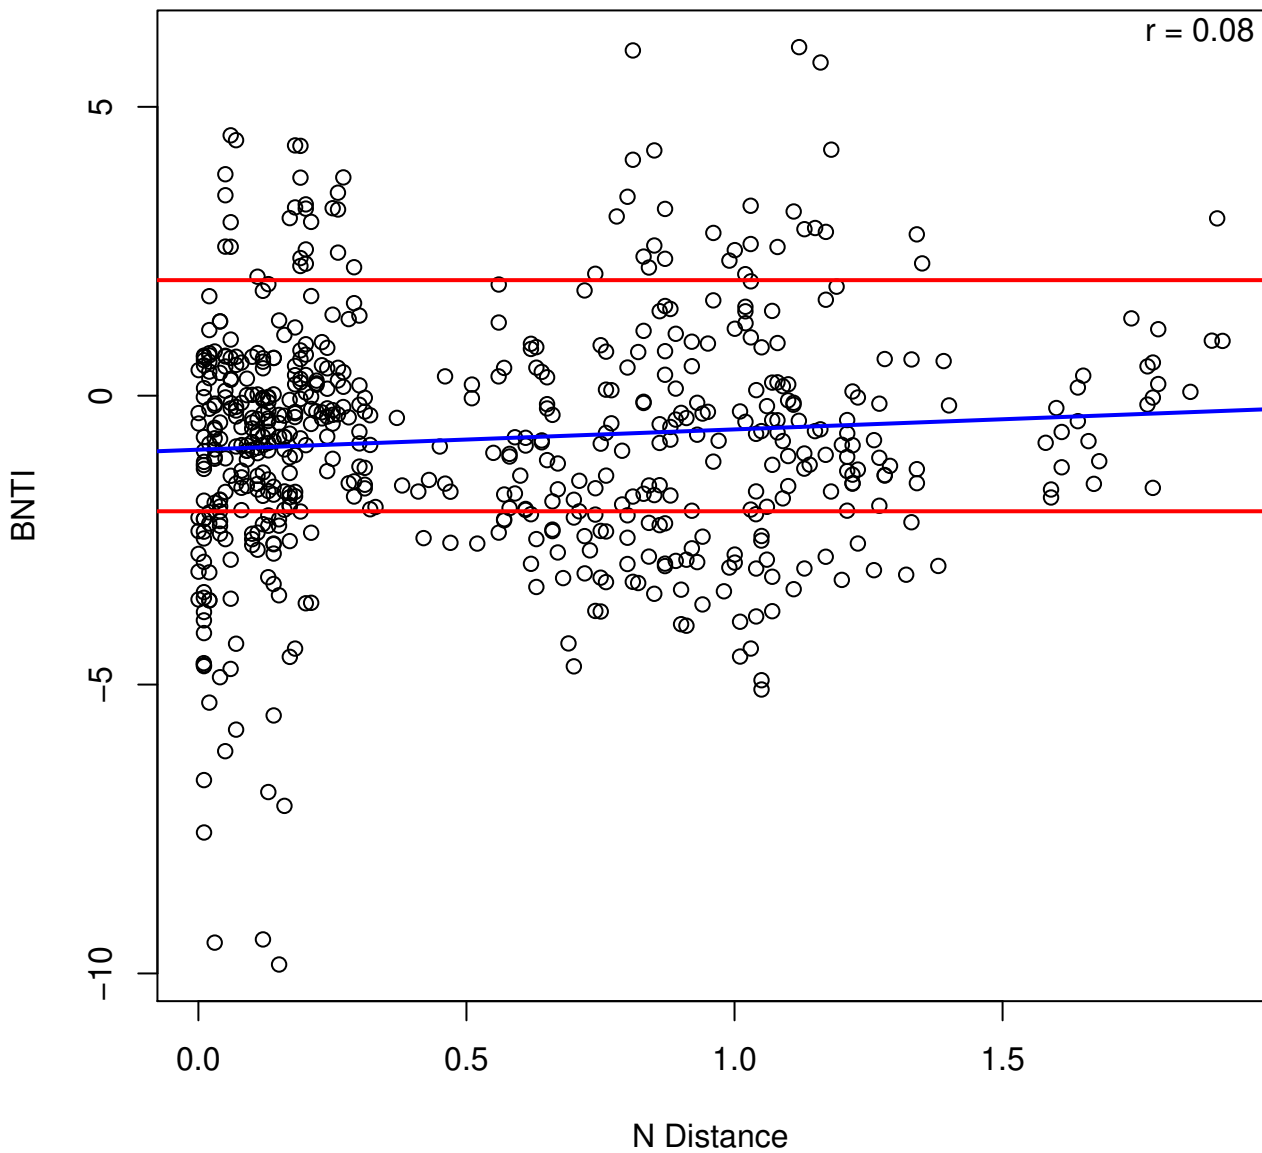



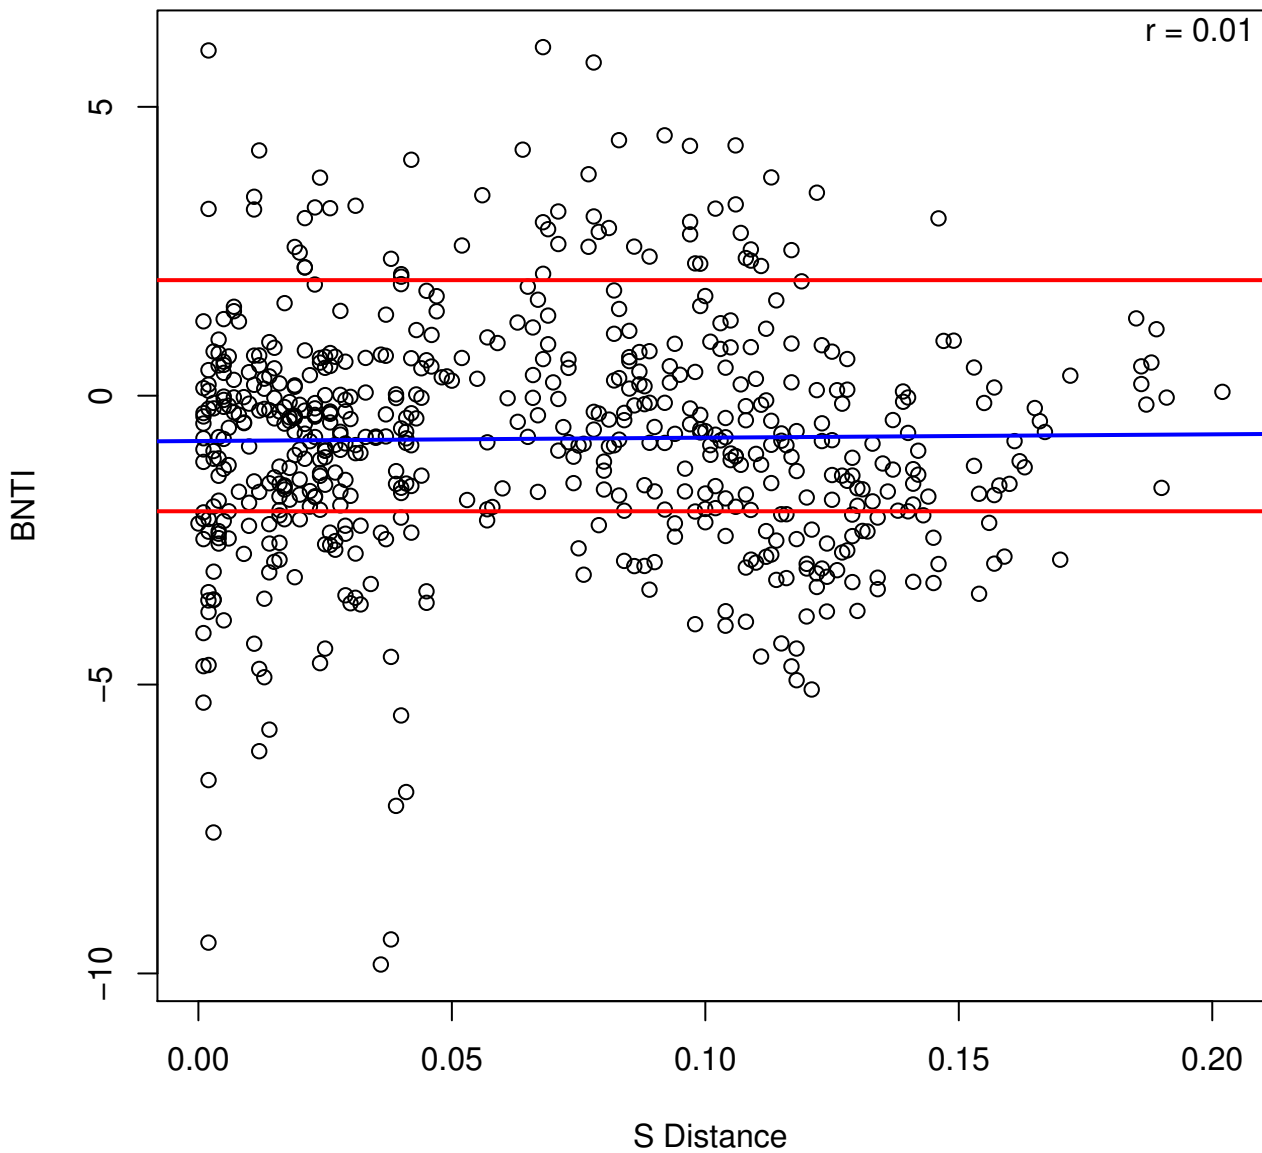

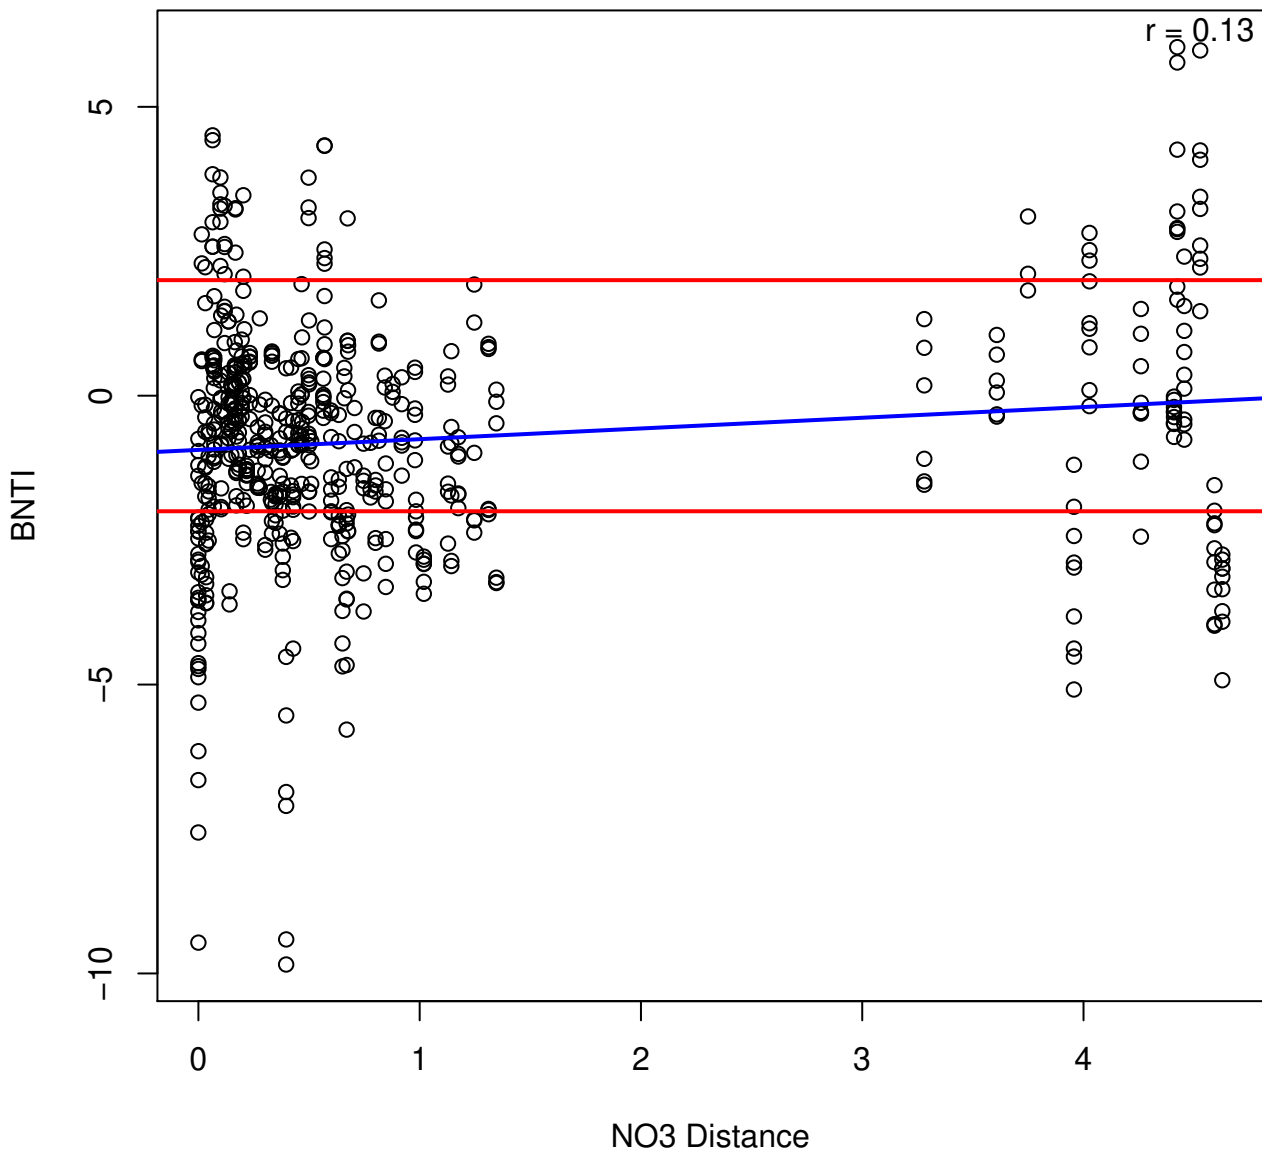

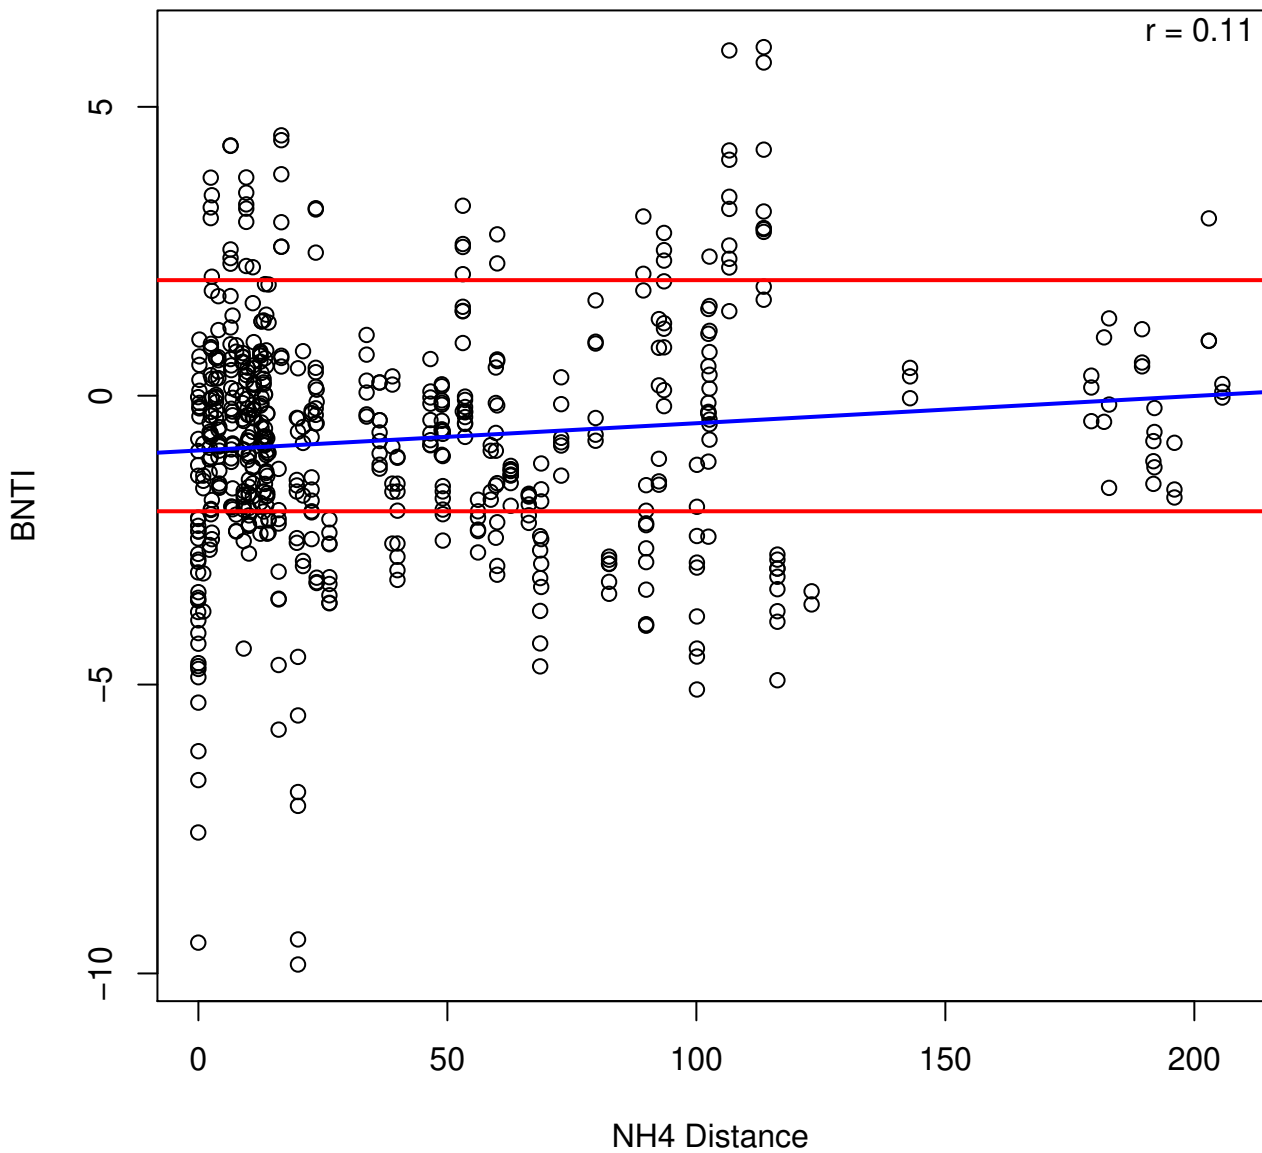

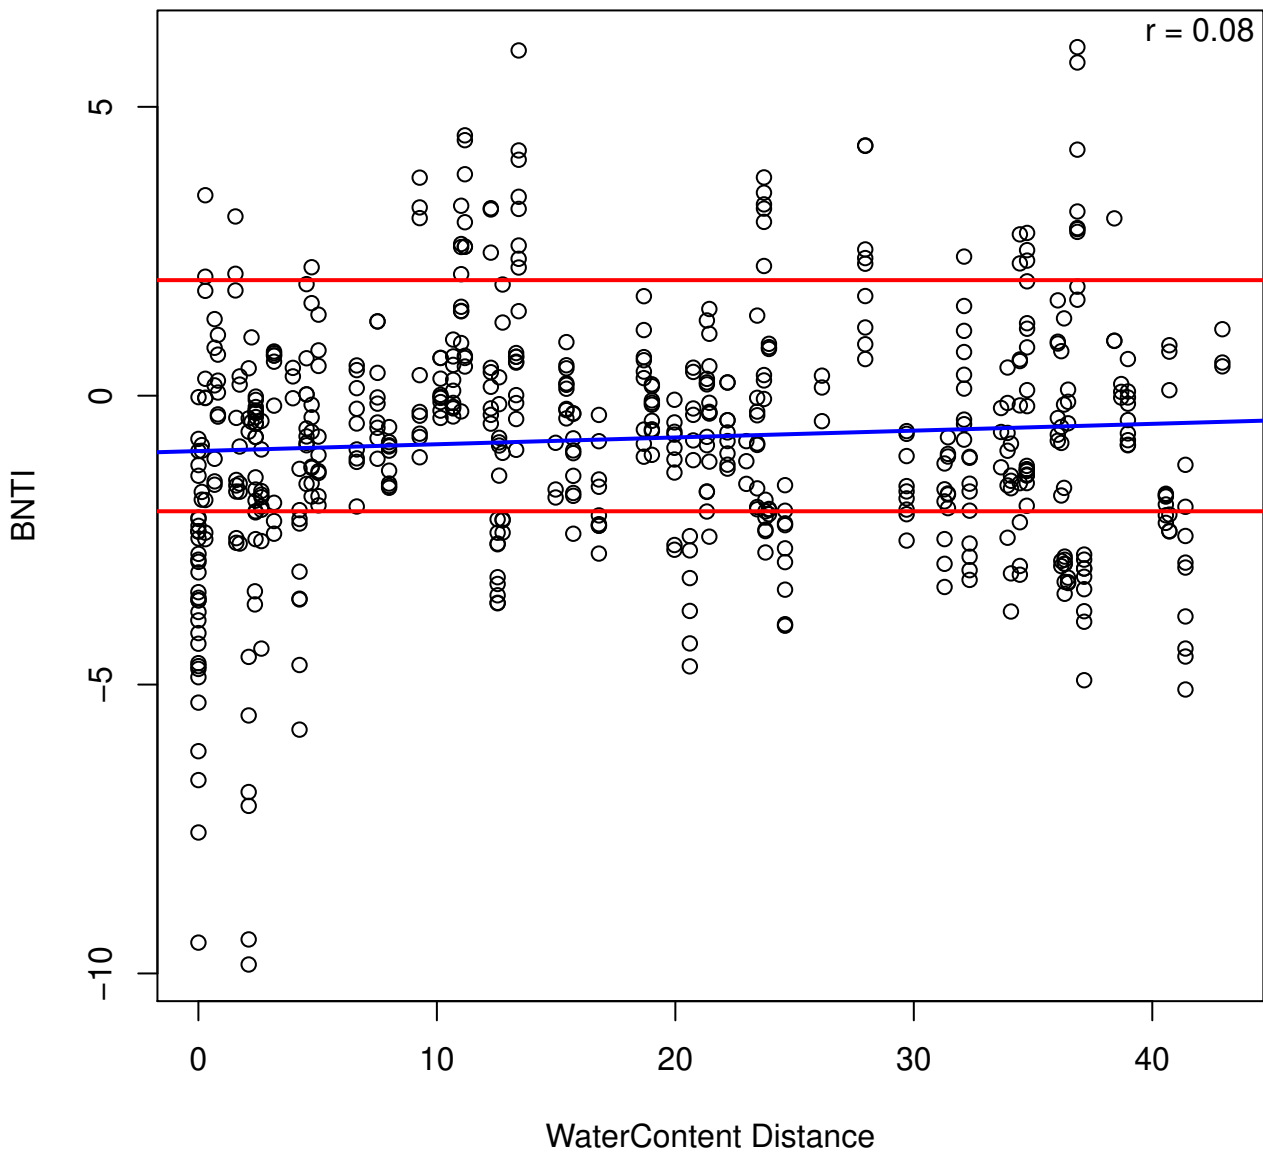

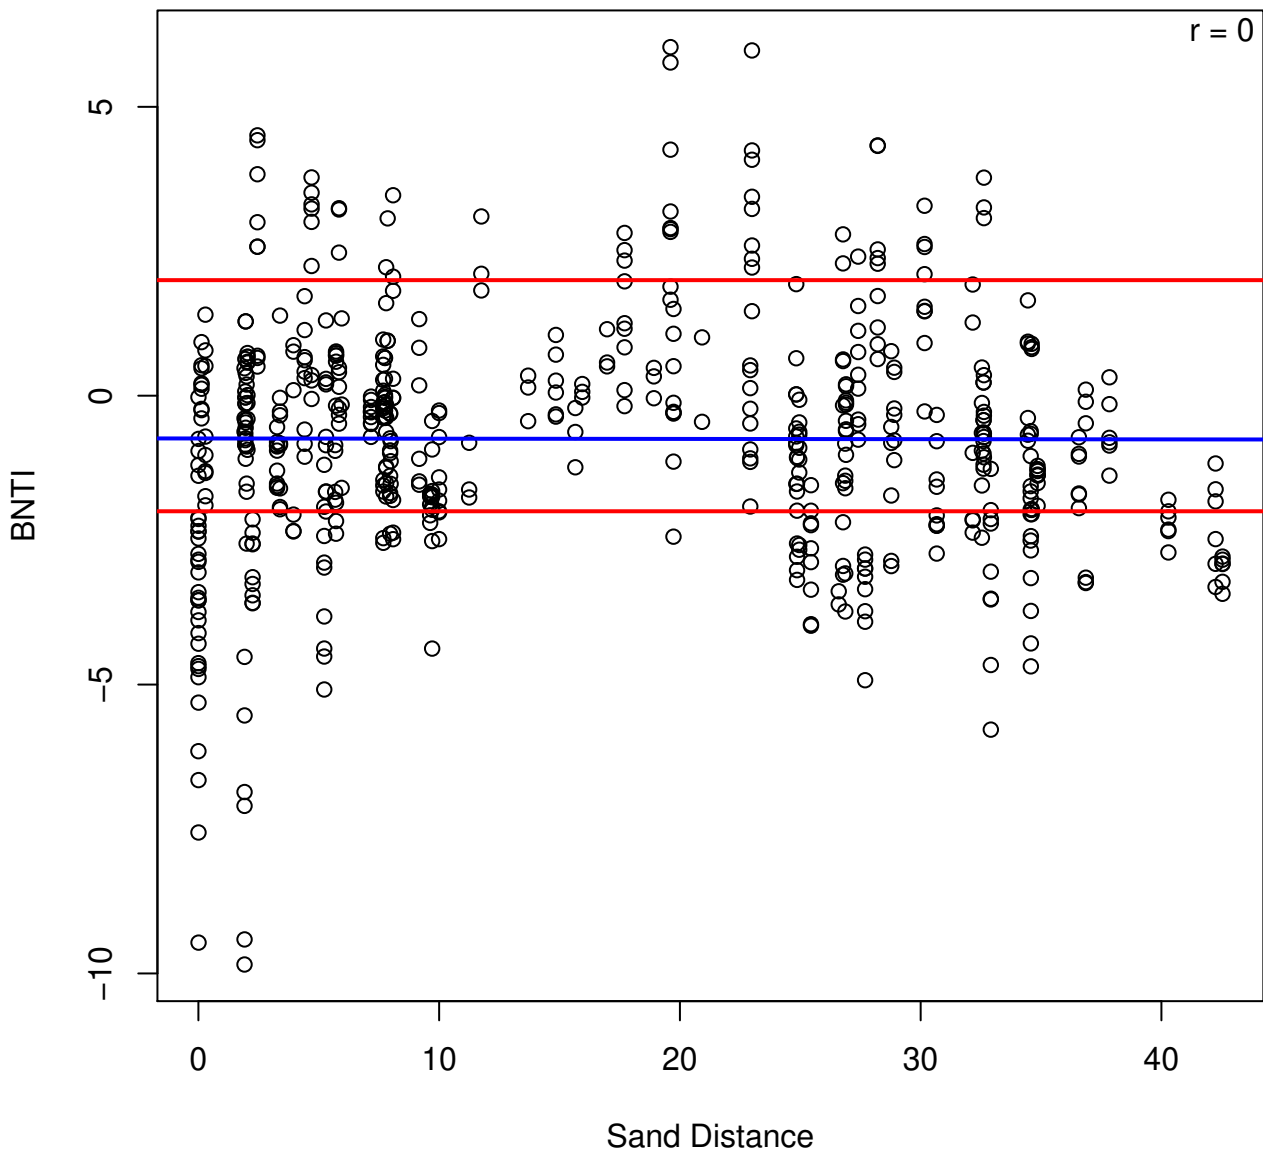

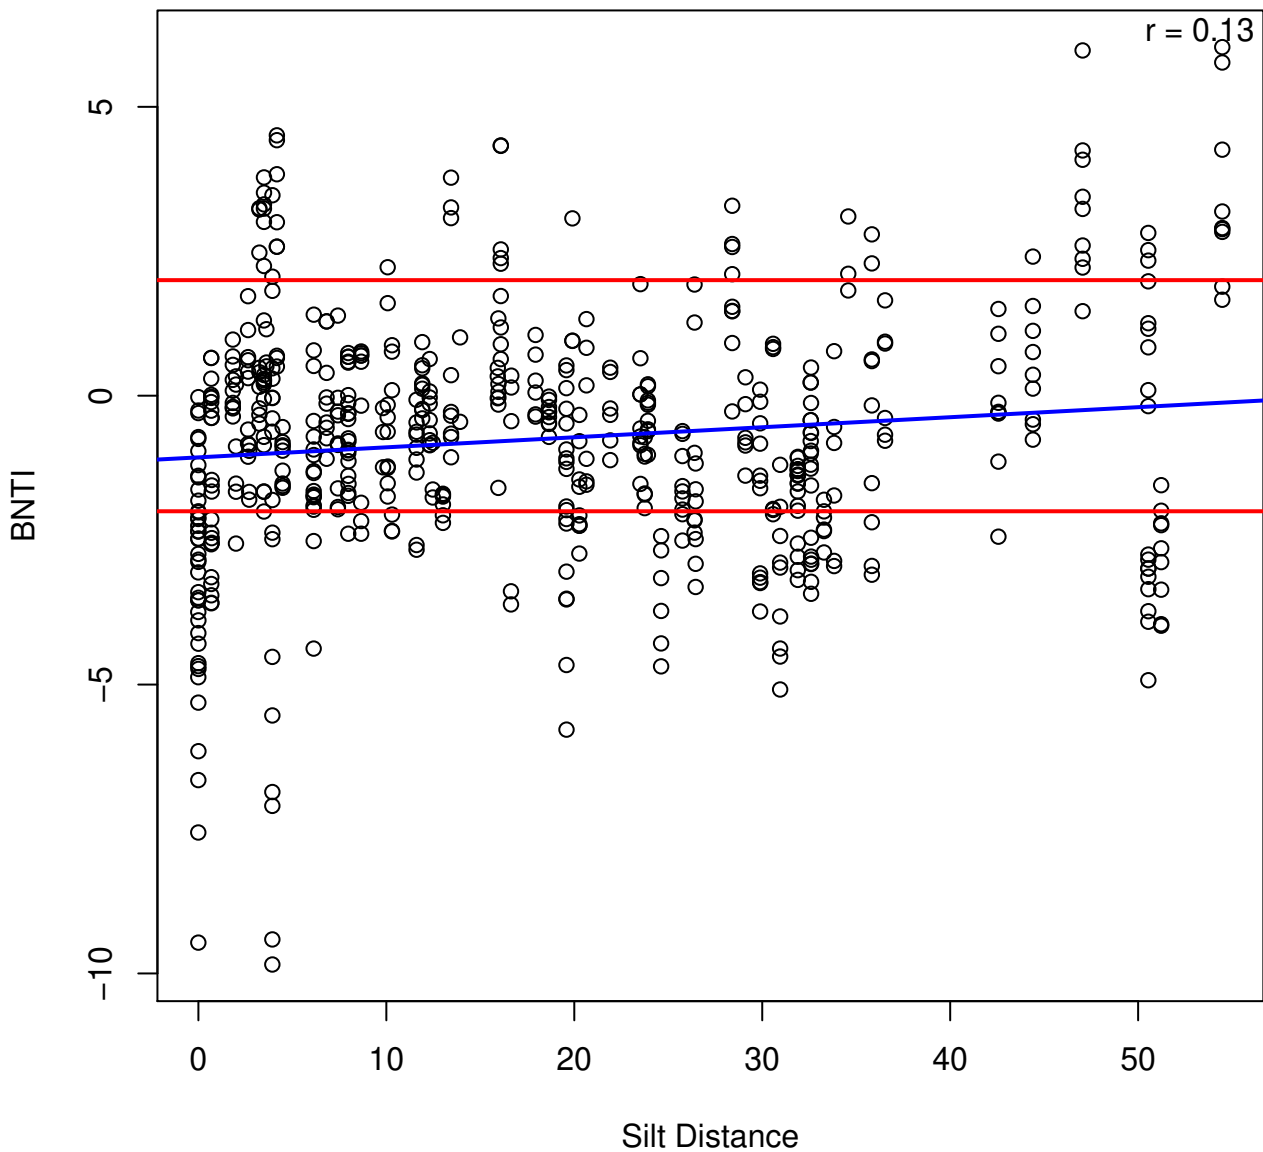

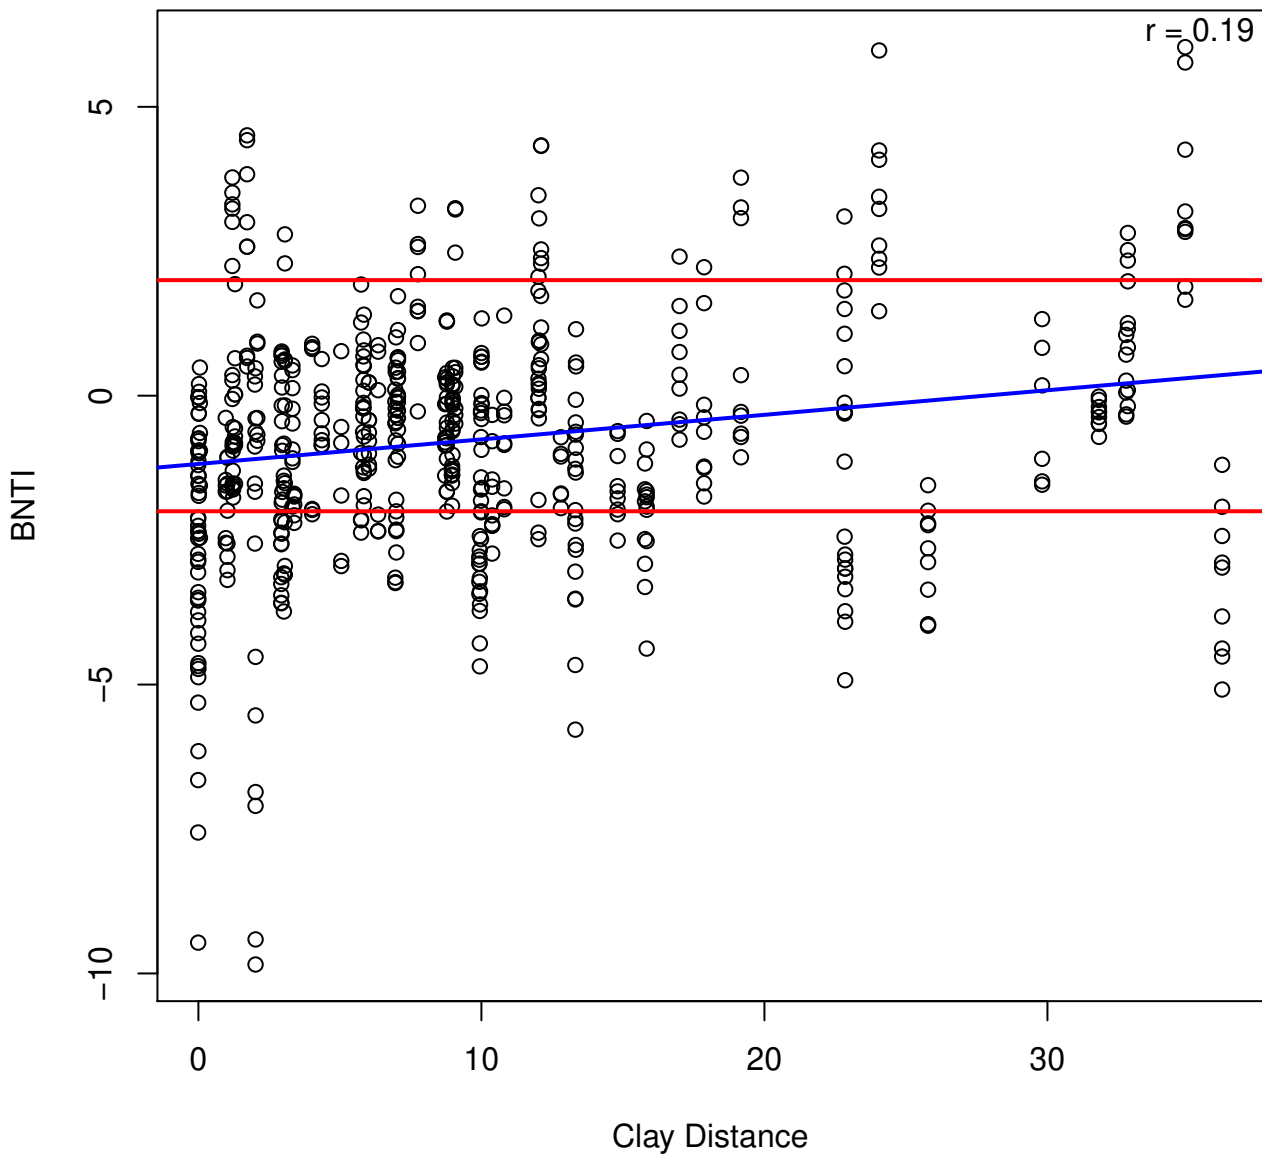

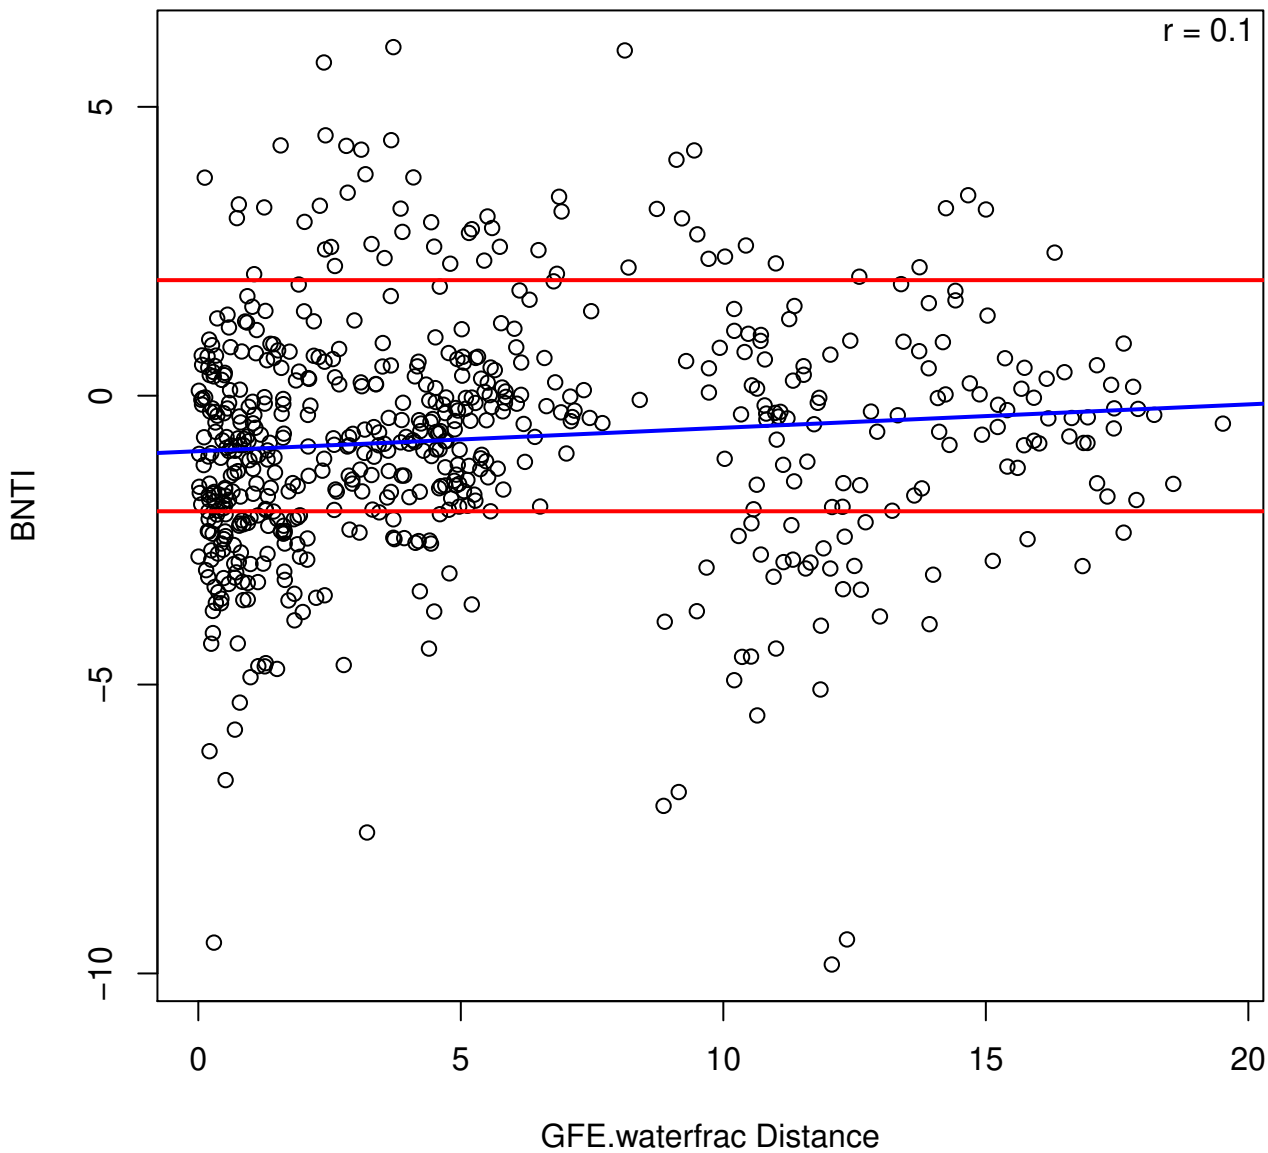



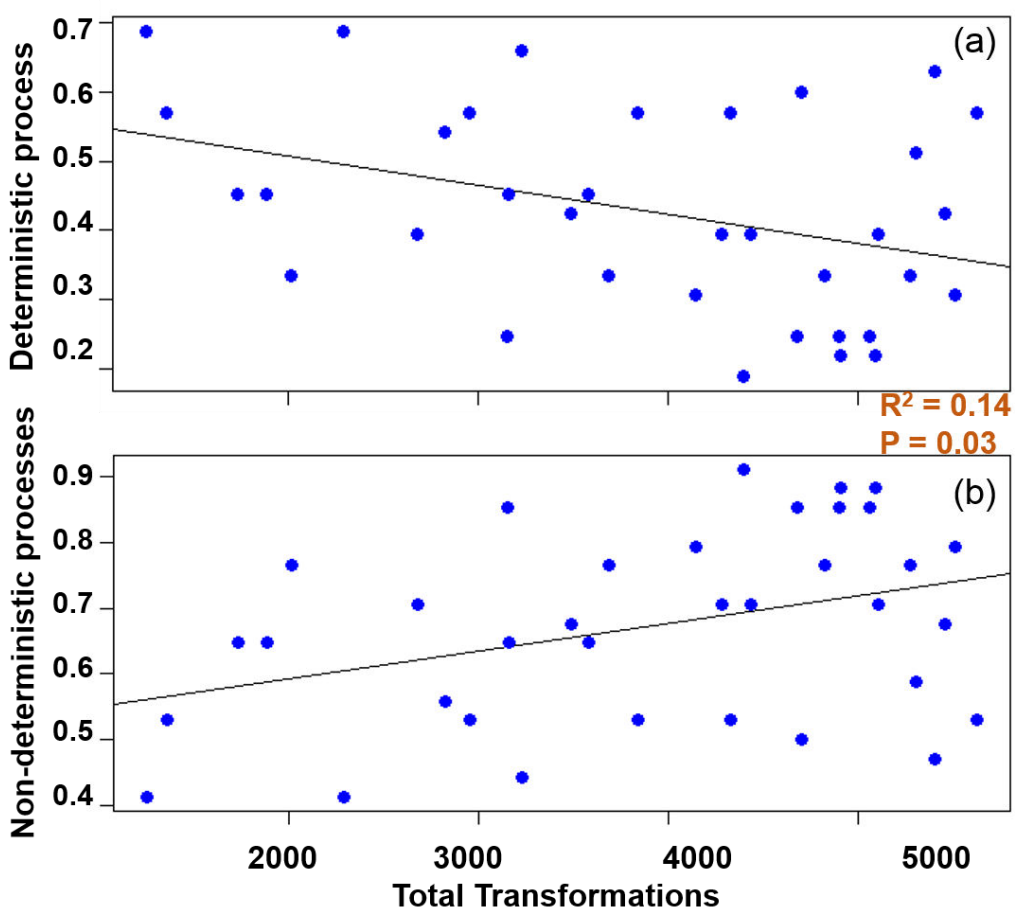

**Supplementary Figure 3** Inferred biogeochemical transformations regressed against deterministic (a) and non-deterministic (b) microbial community assembly metric

Figure S4 Regression of Sorensen presence/absence of compound peaks against environmental and community assembly variables

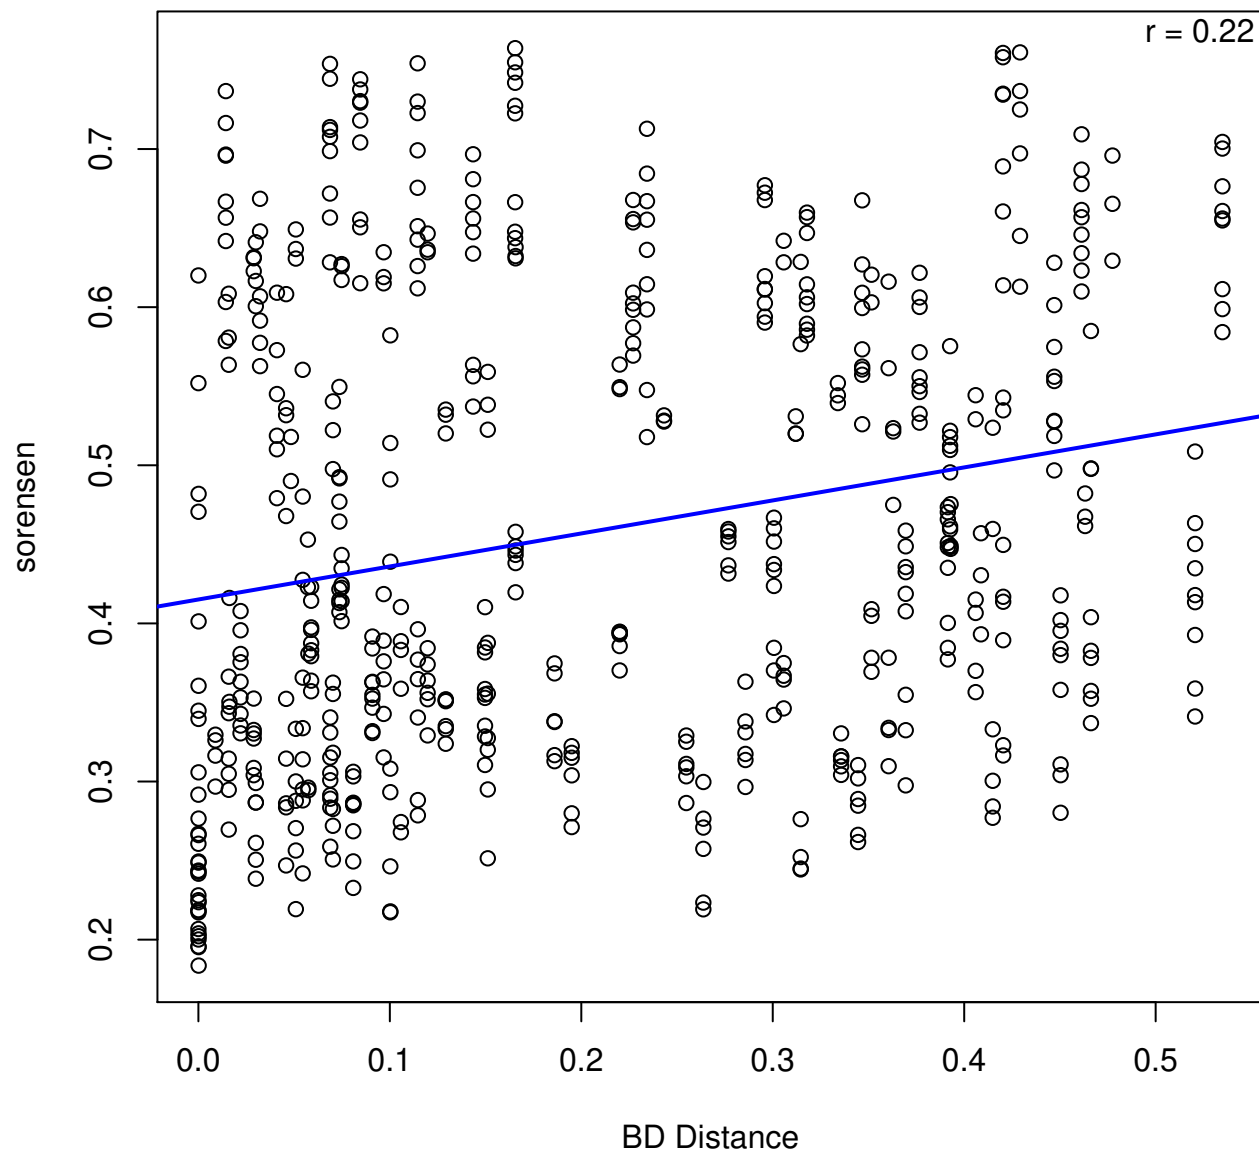

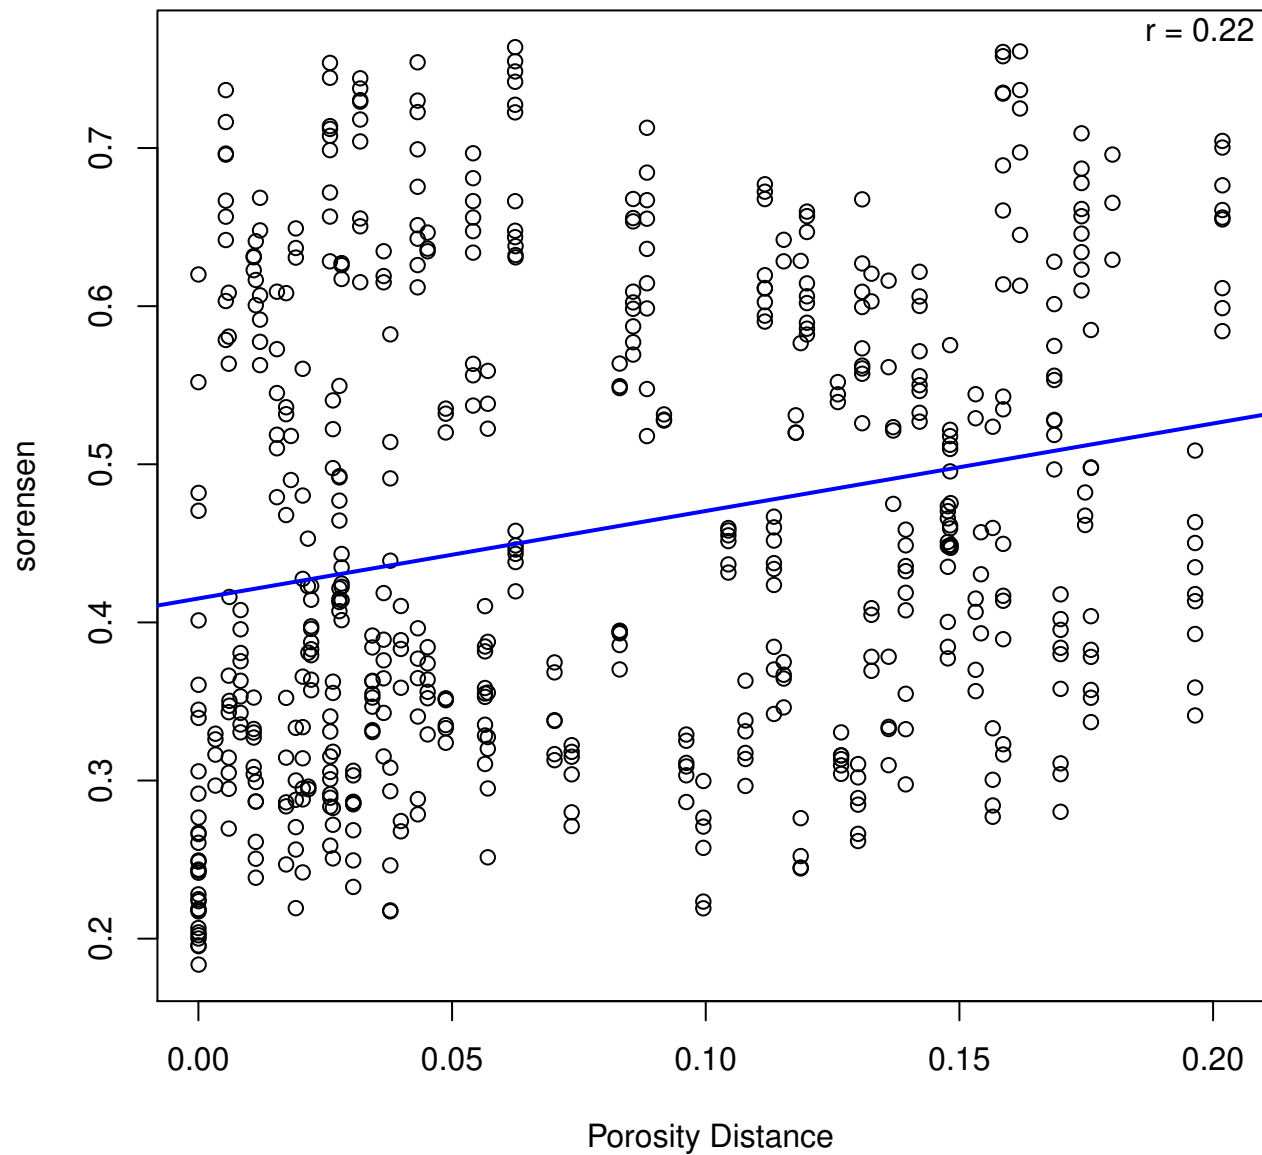

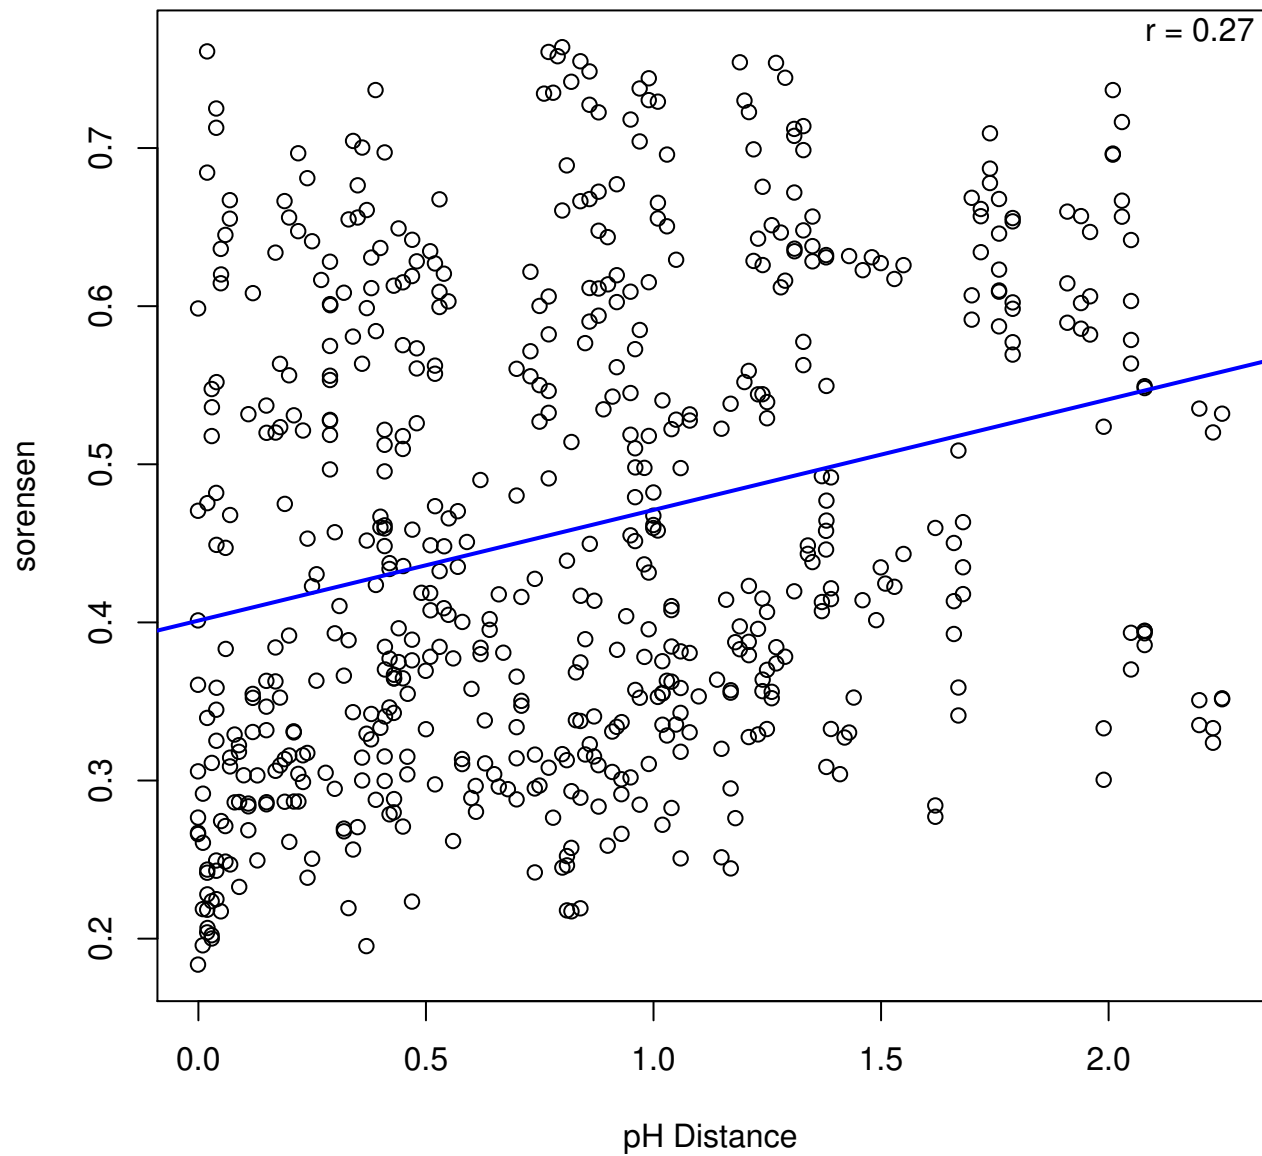

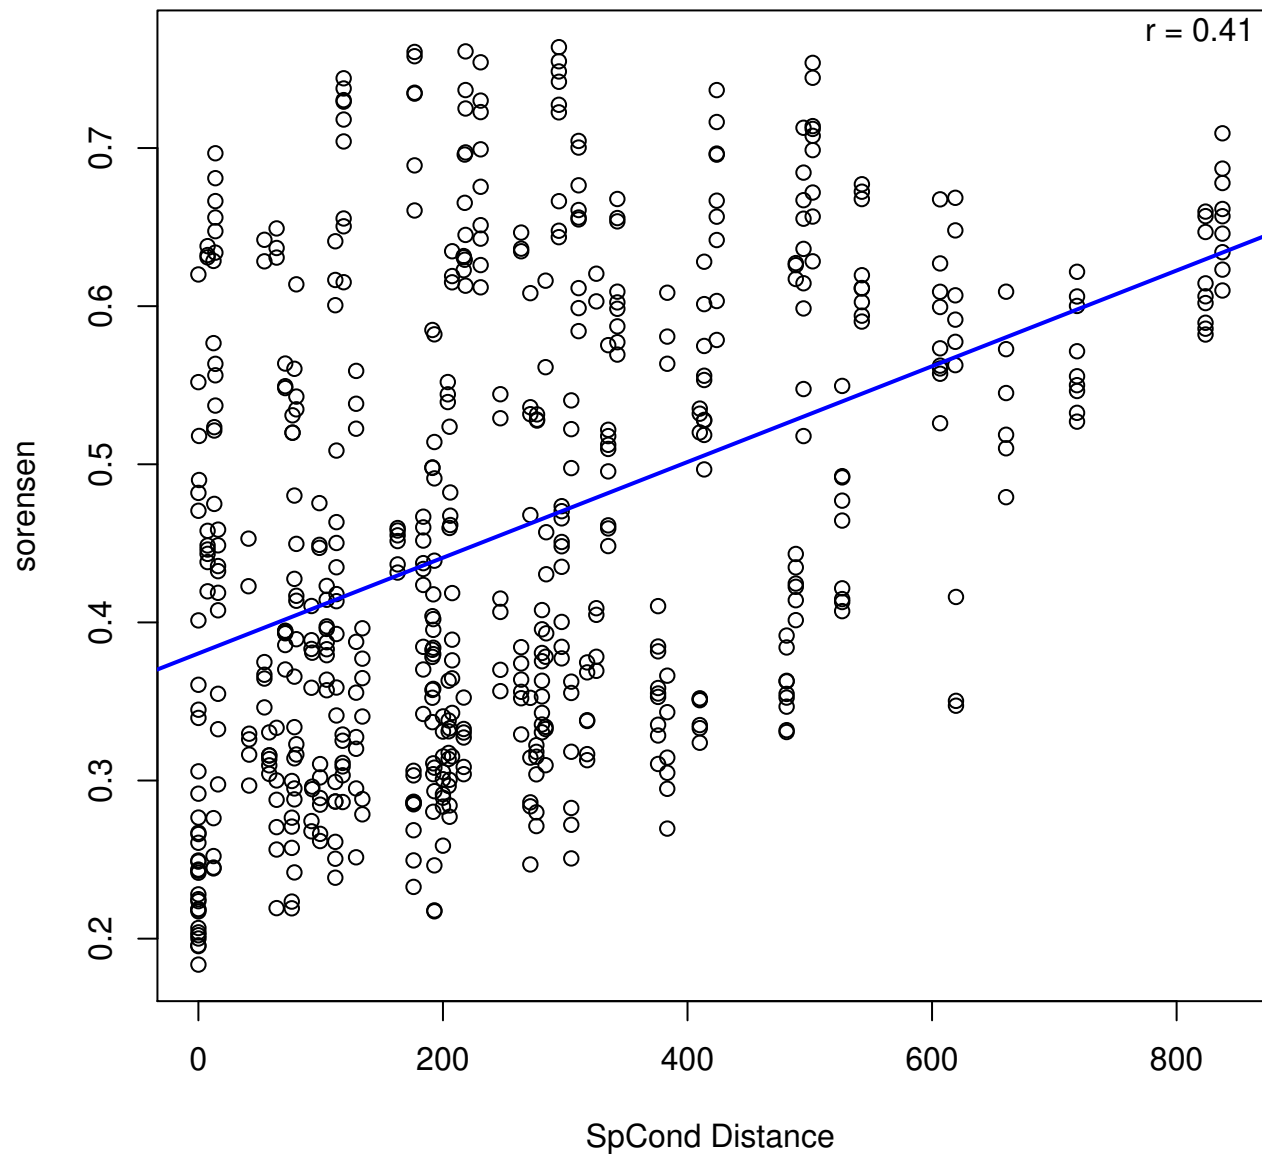

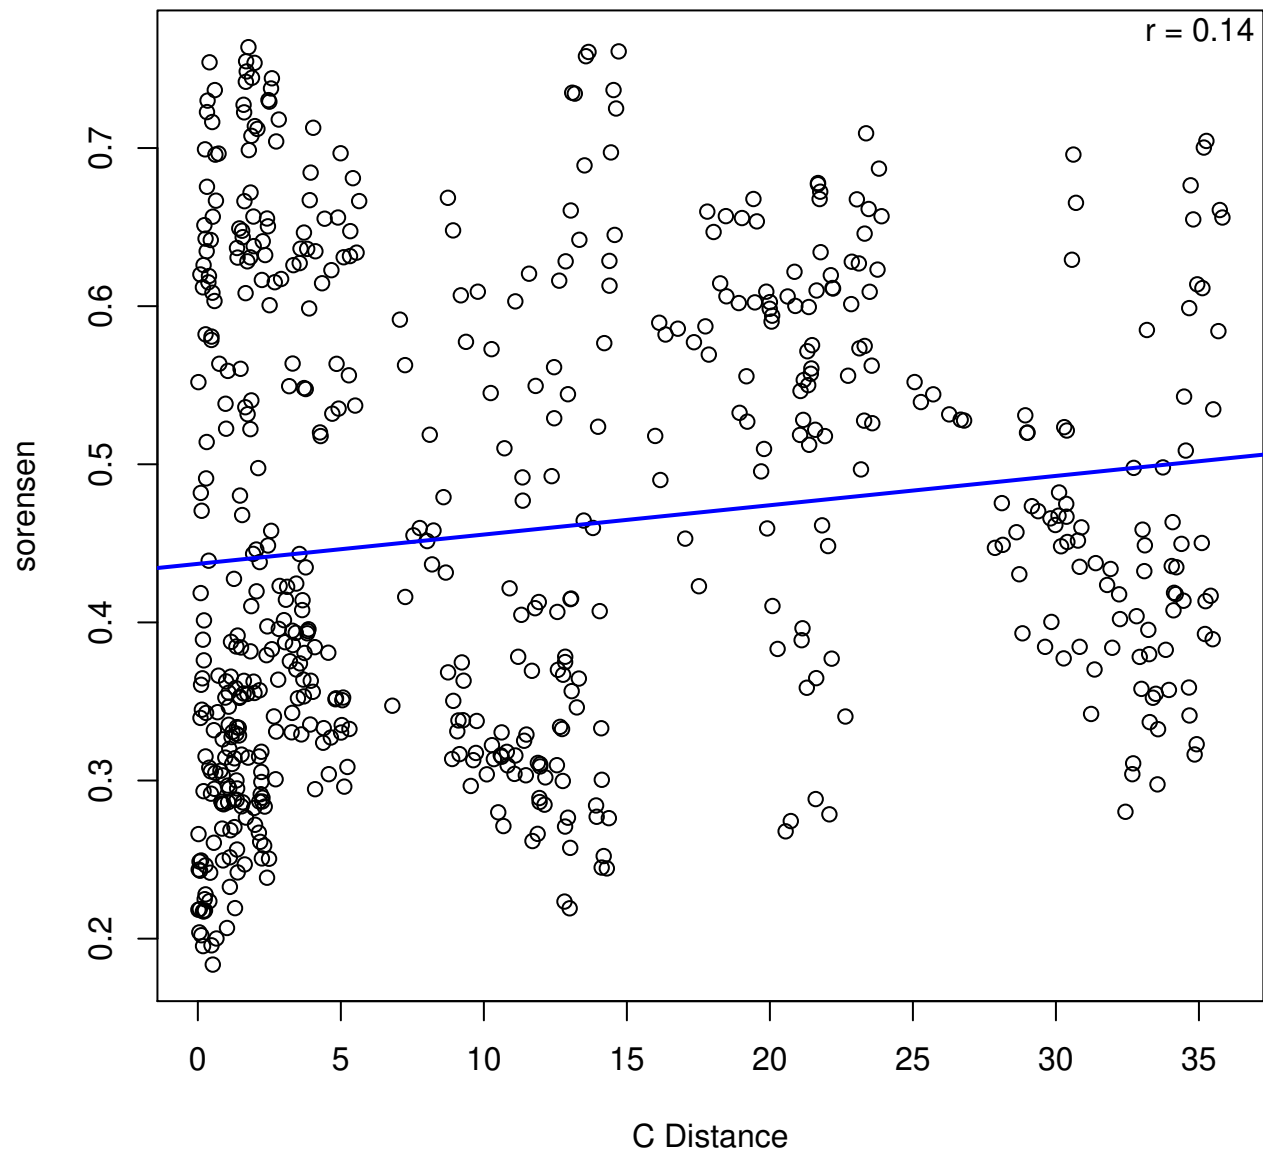

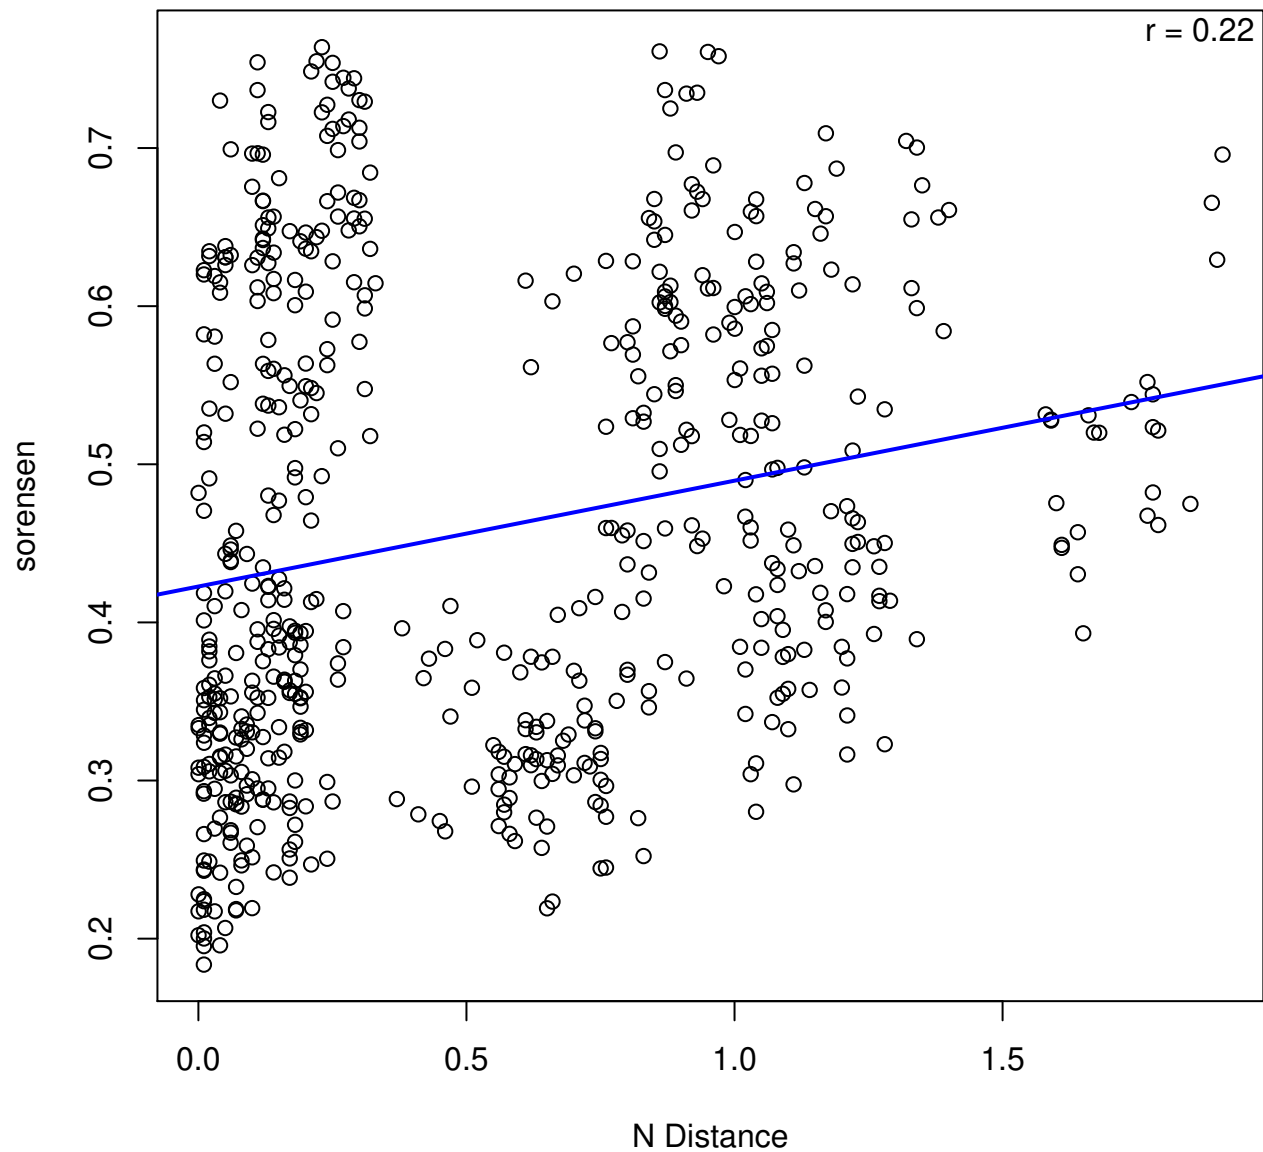

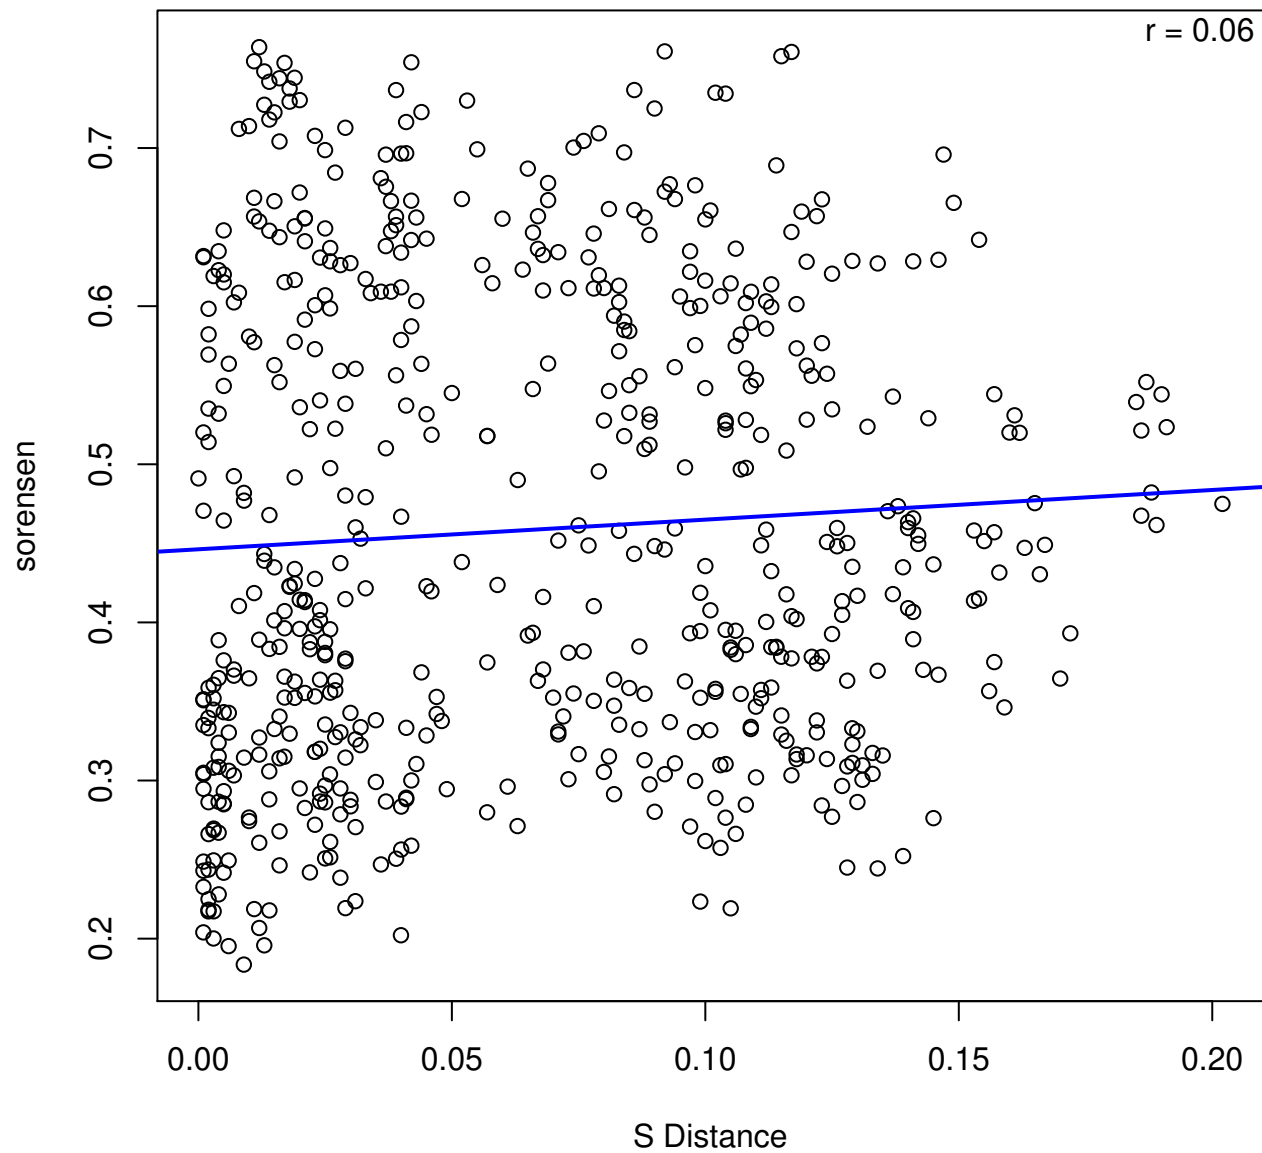



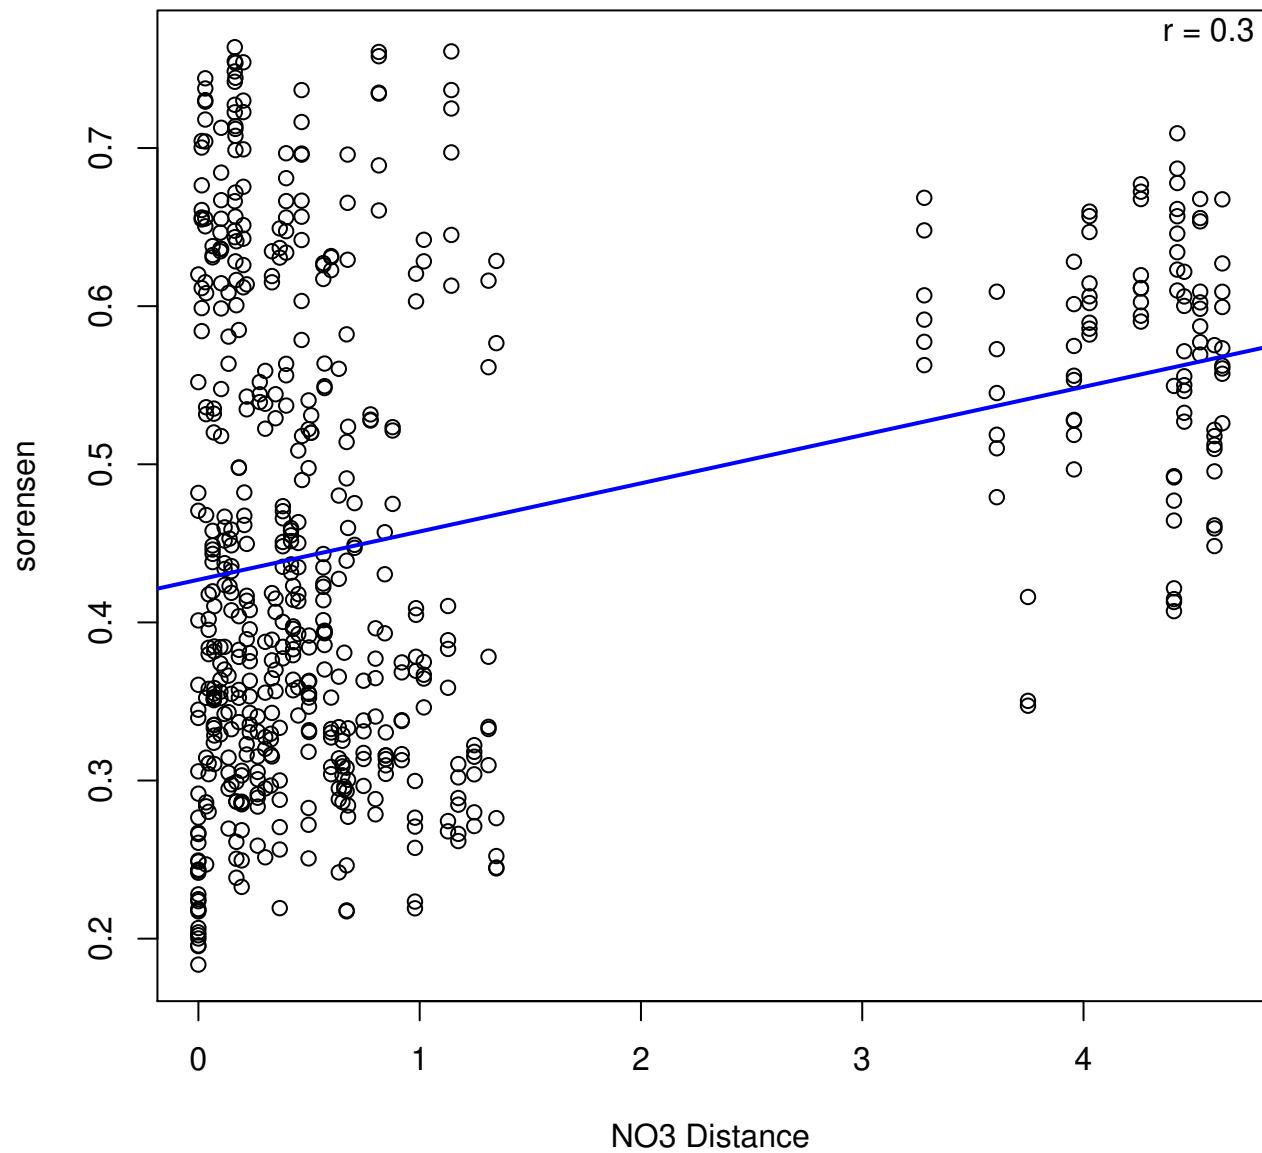

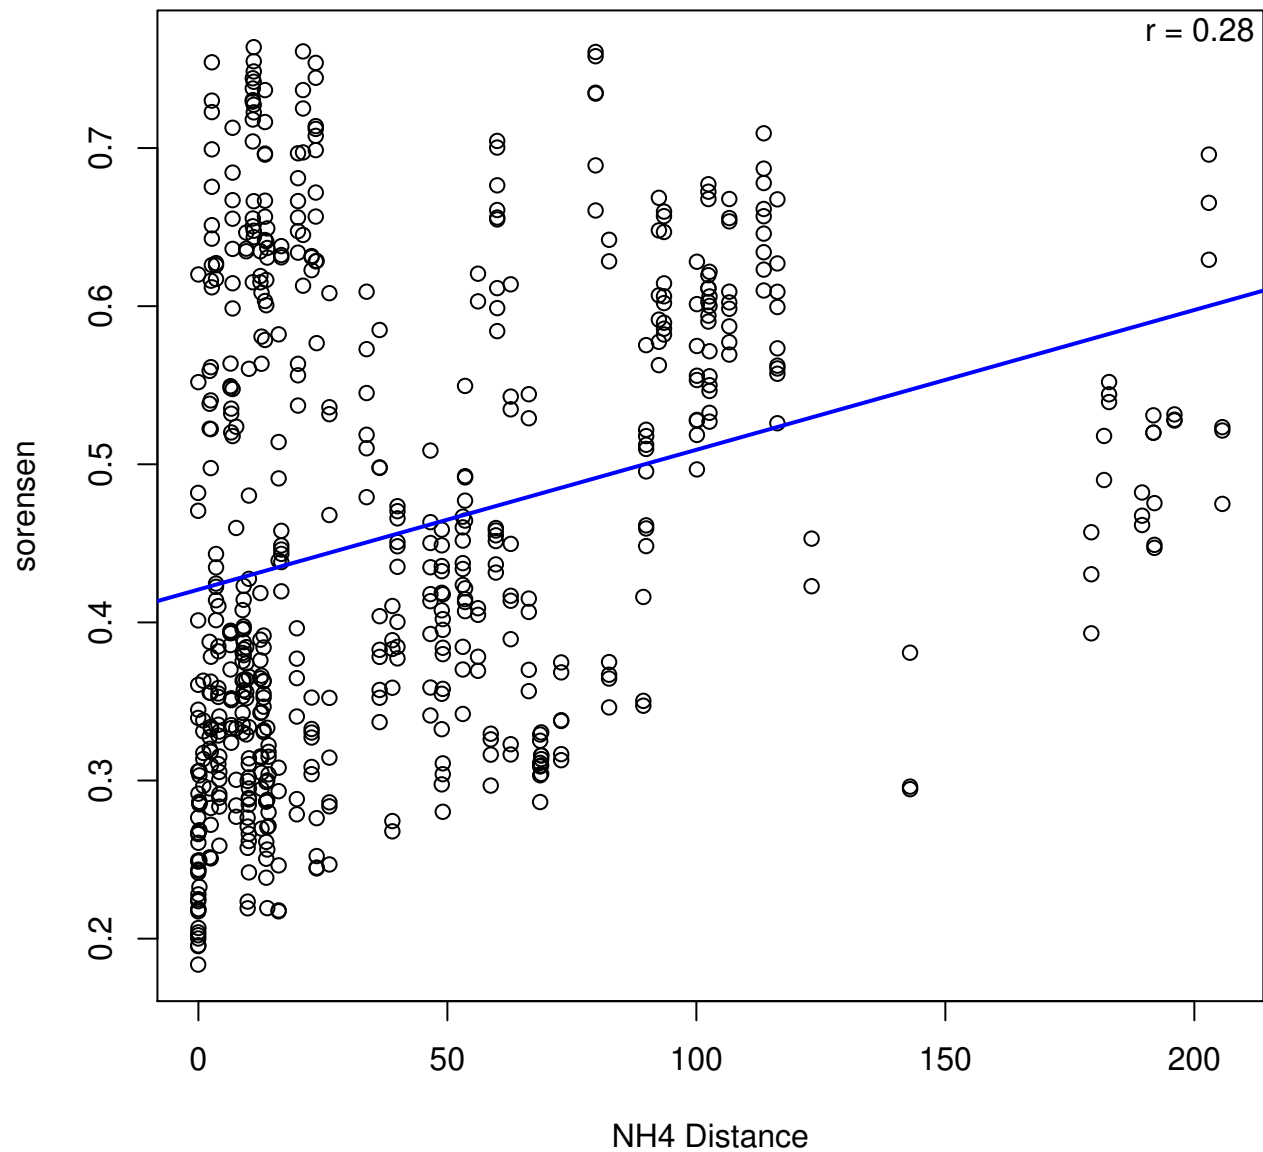

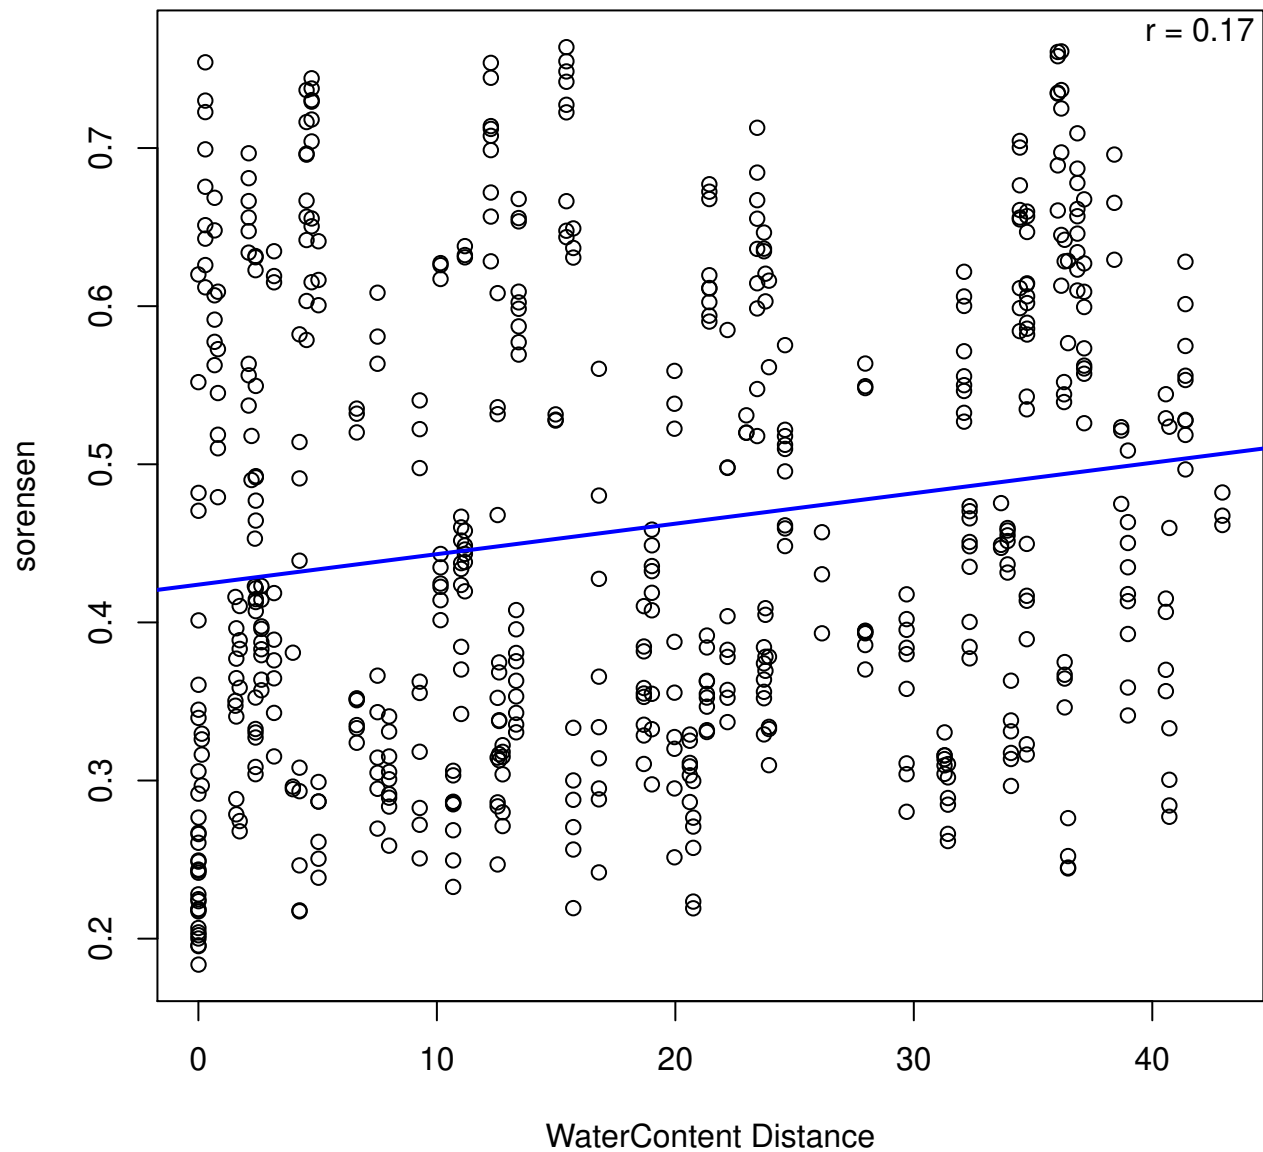

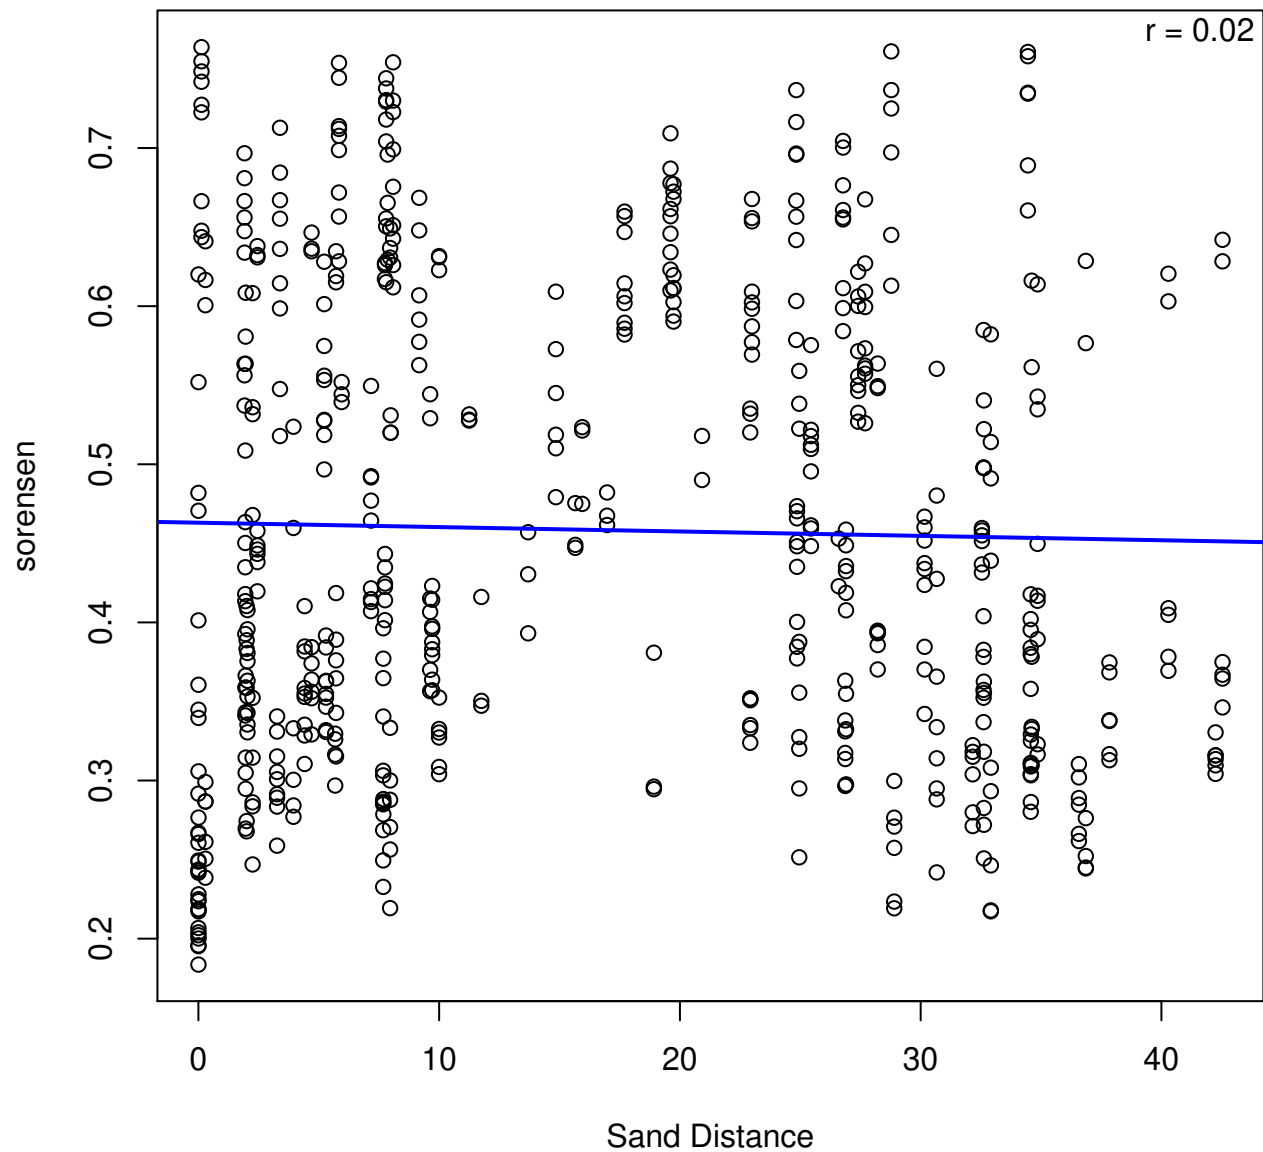

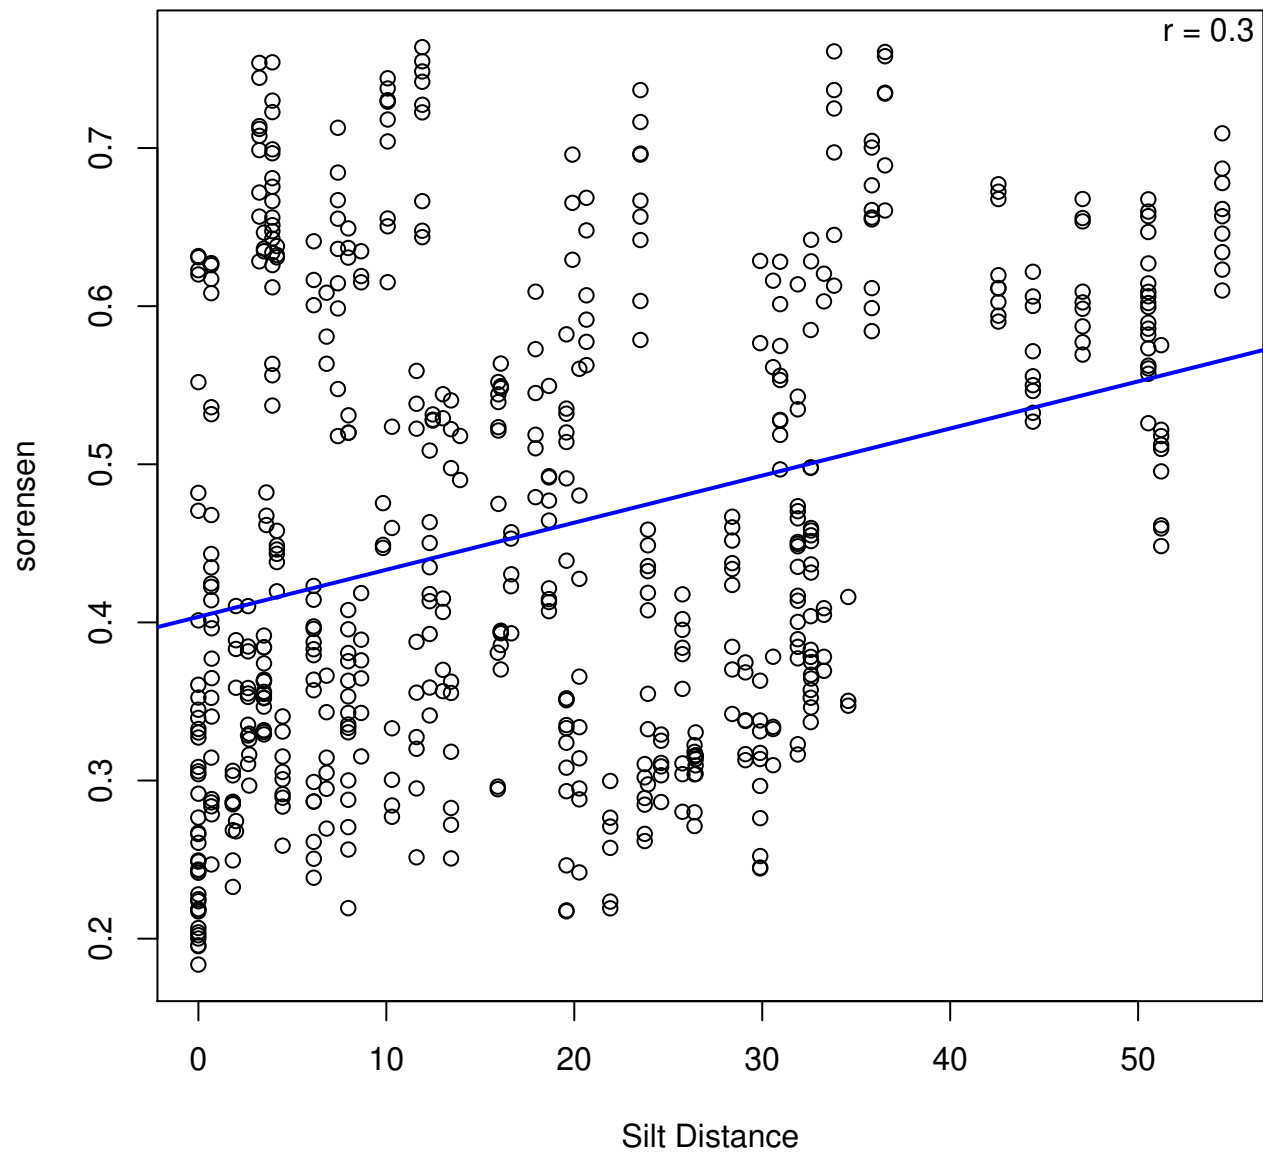

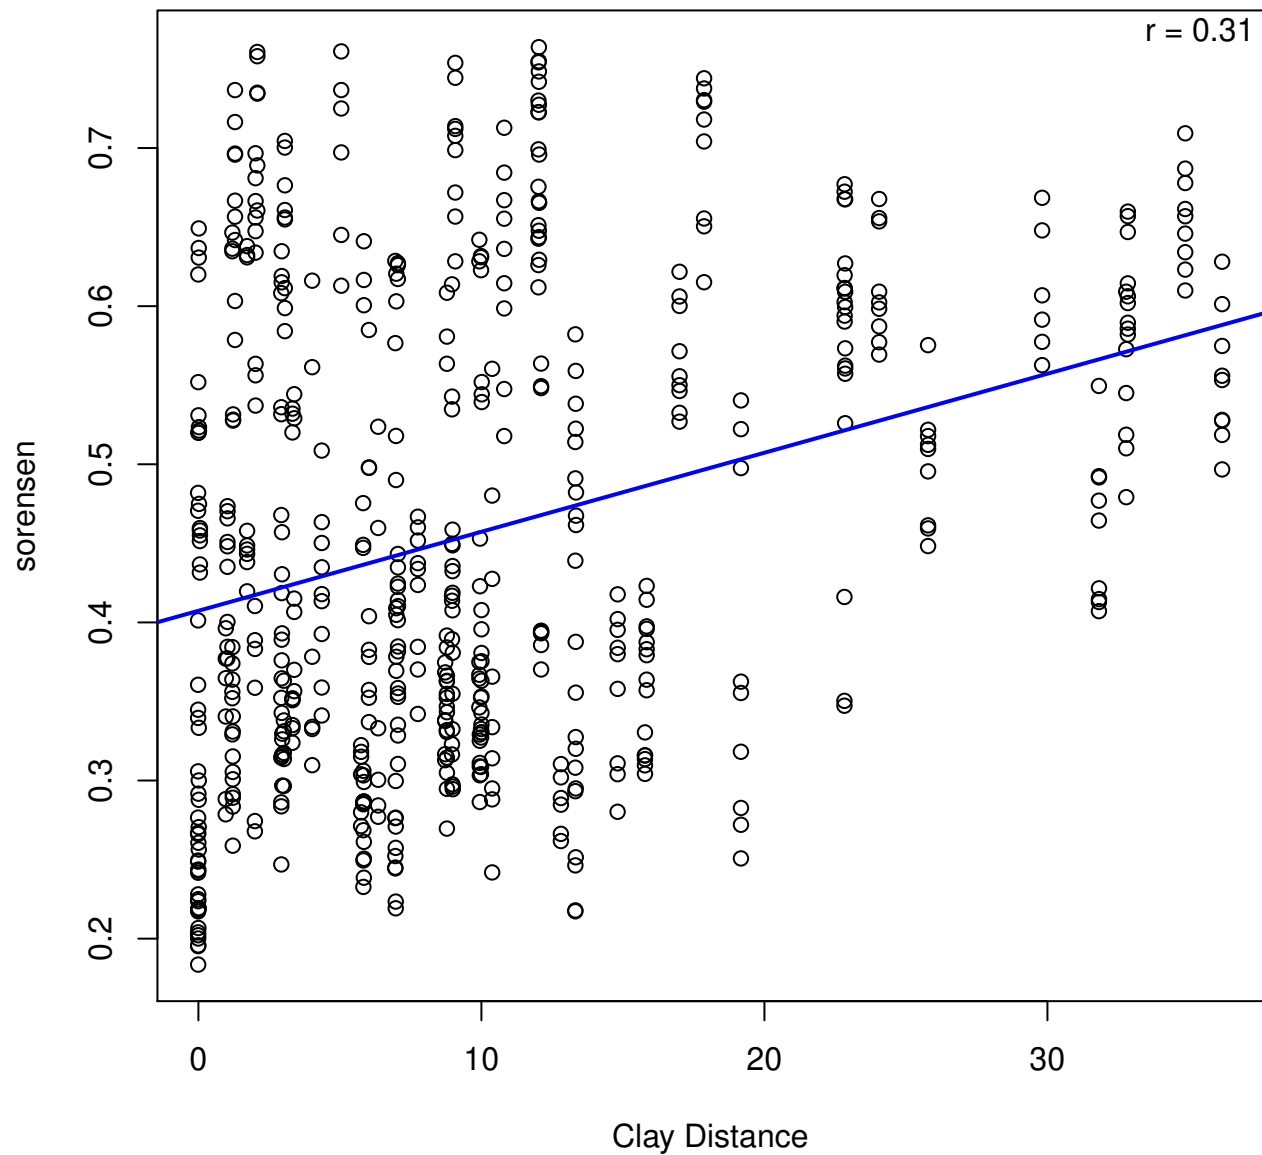

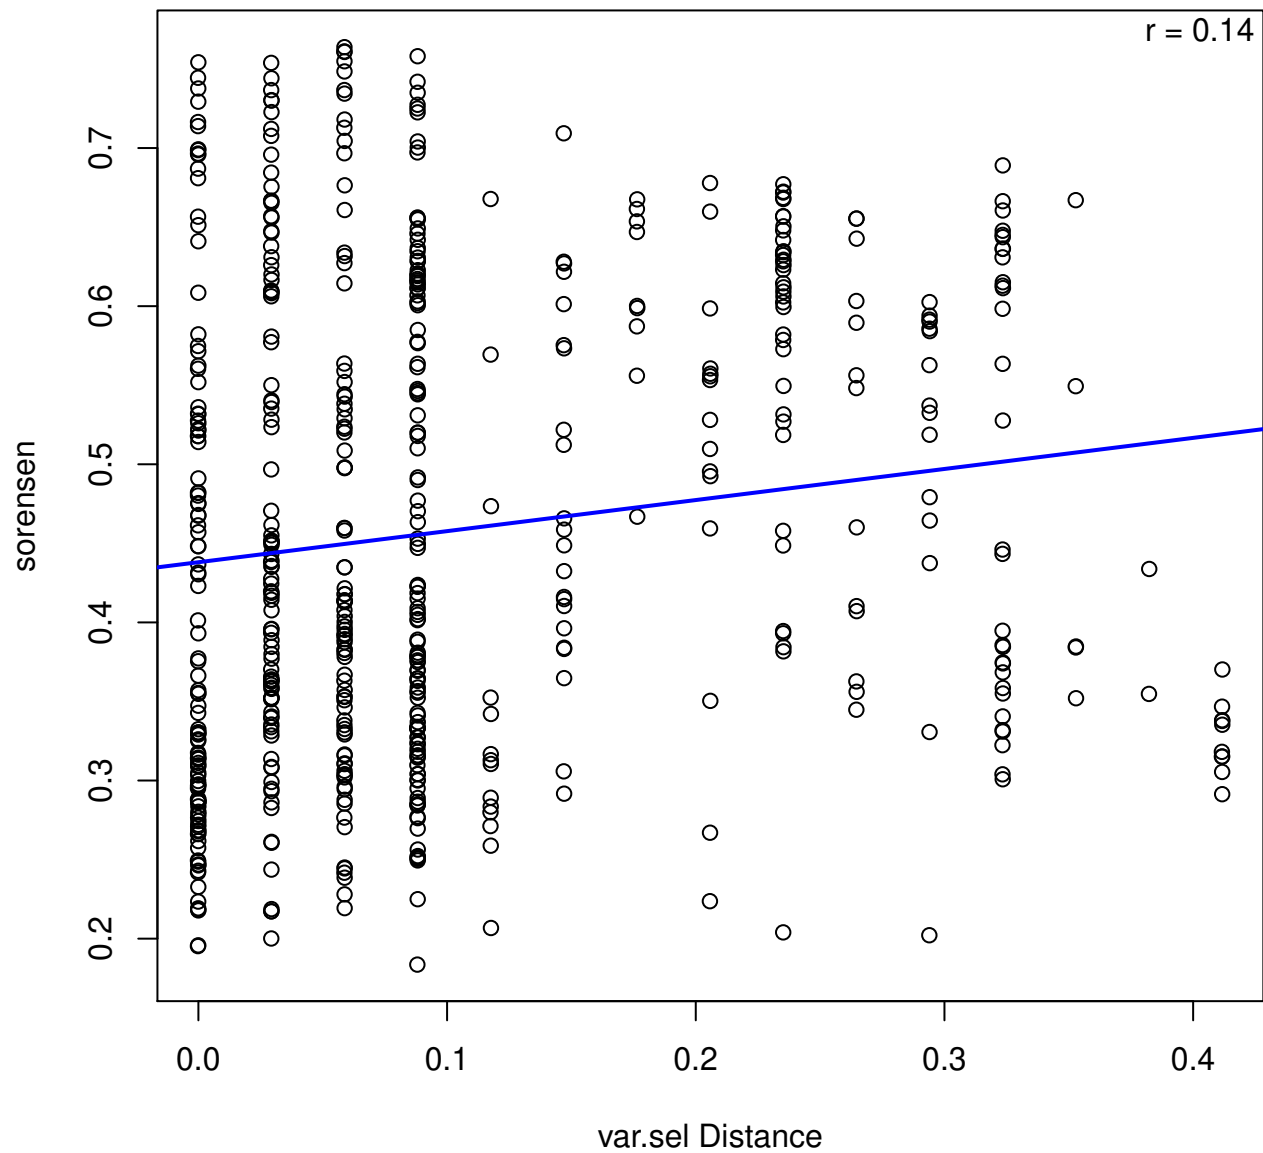

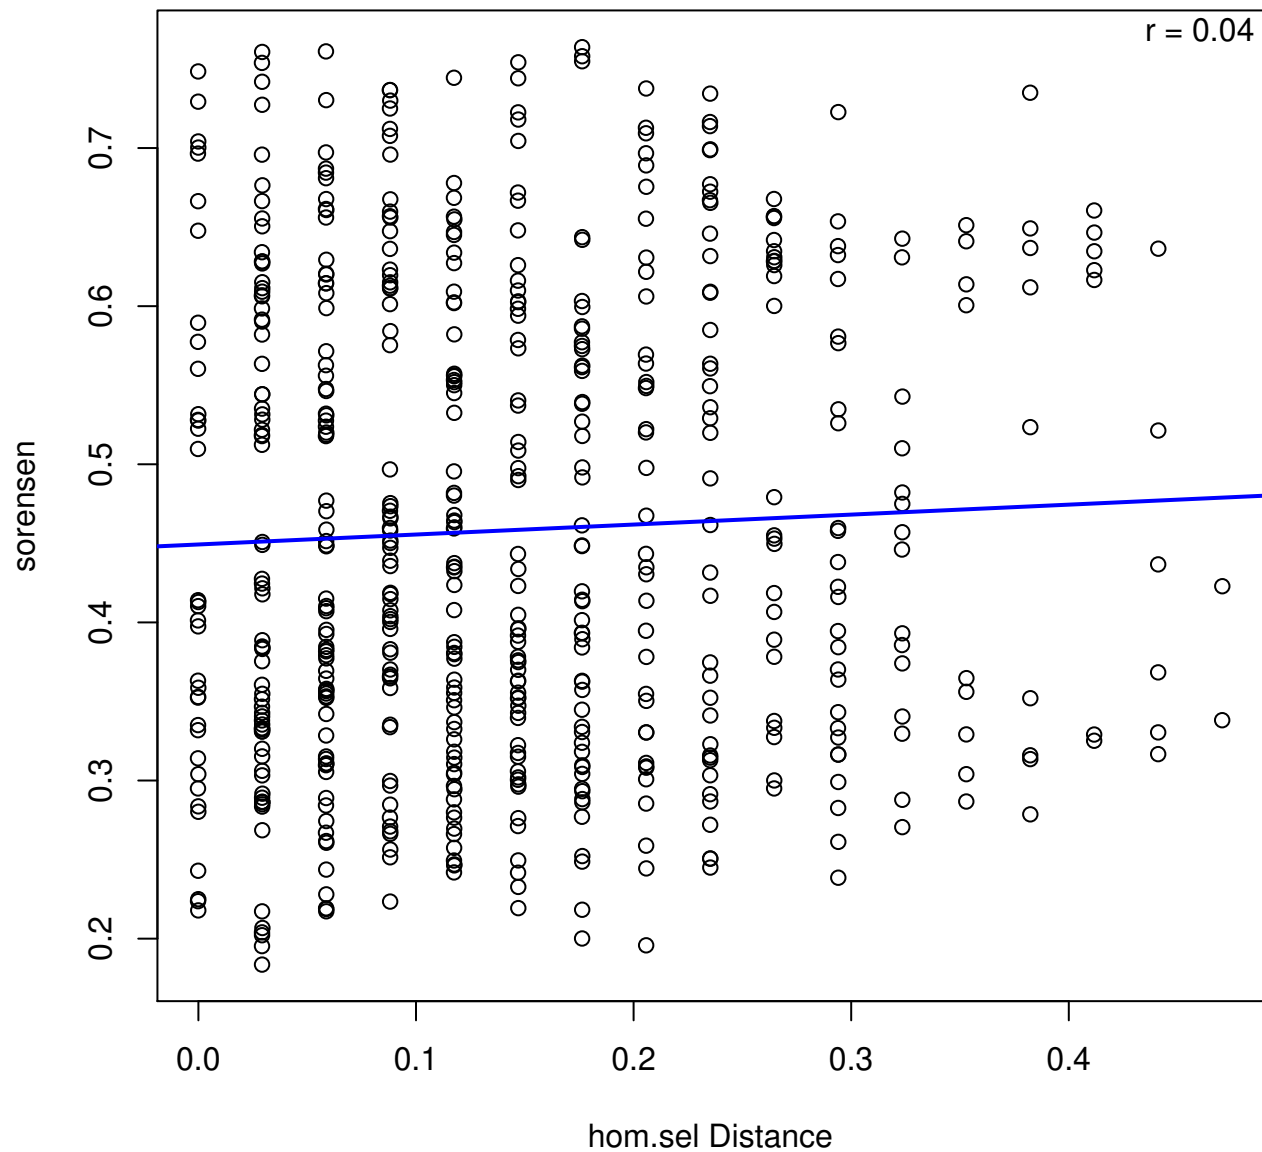



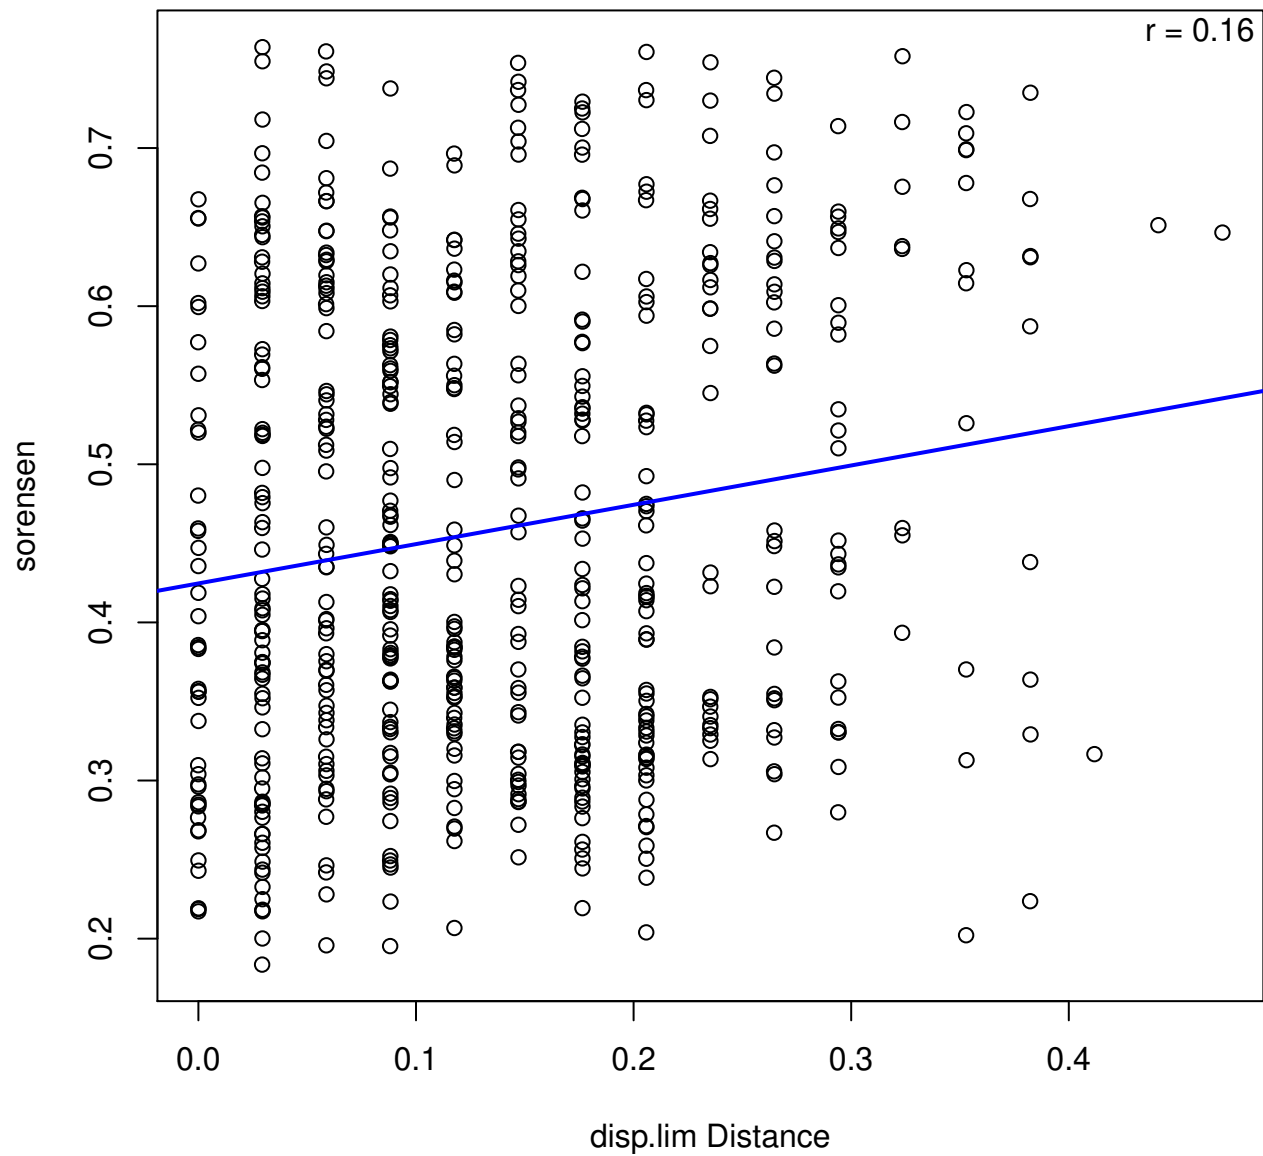

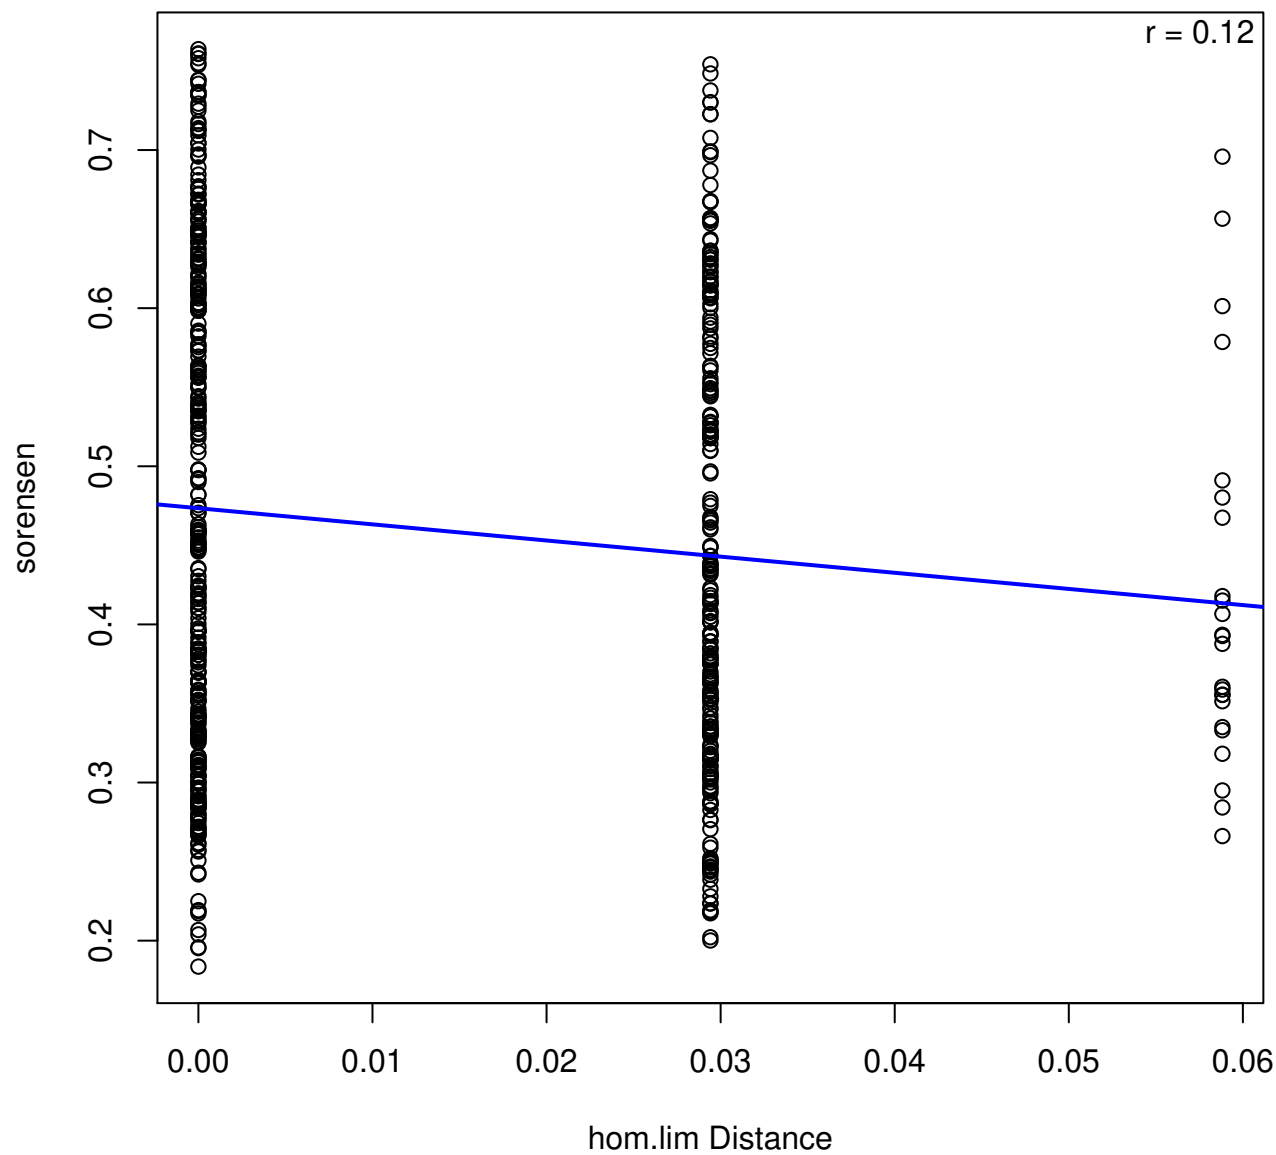

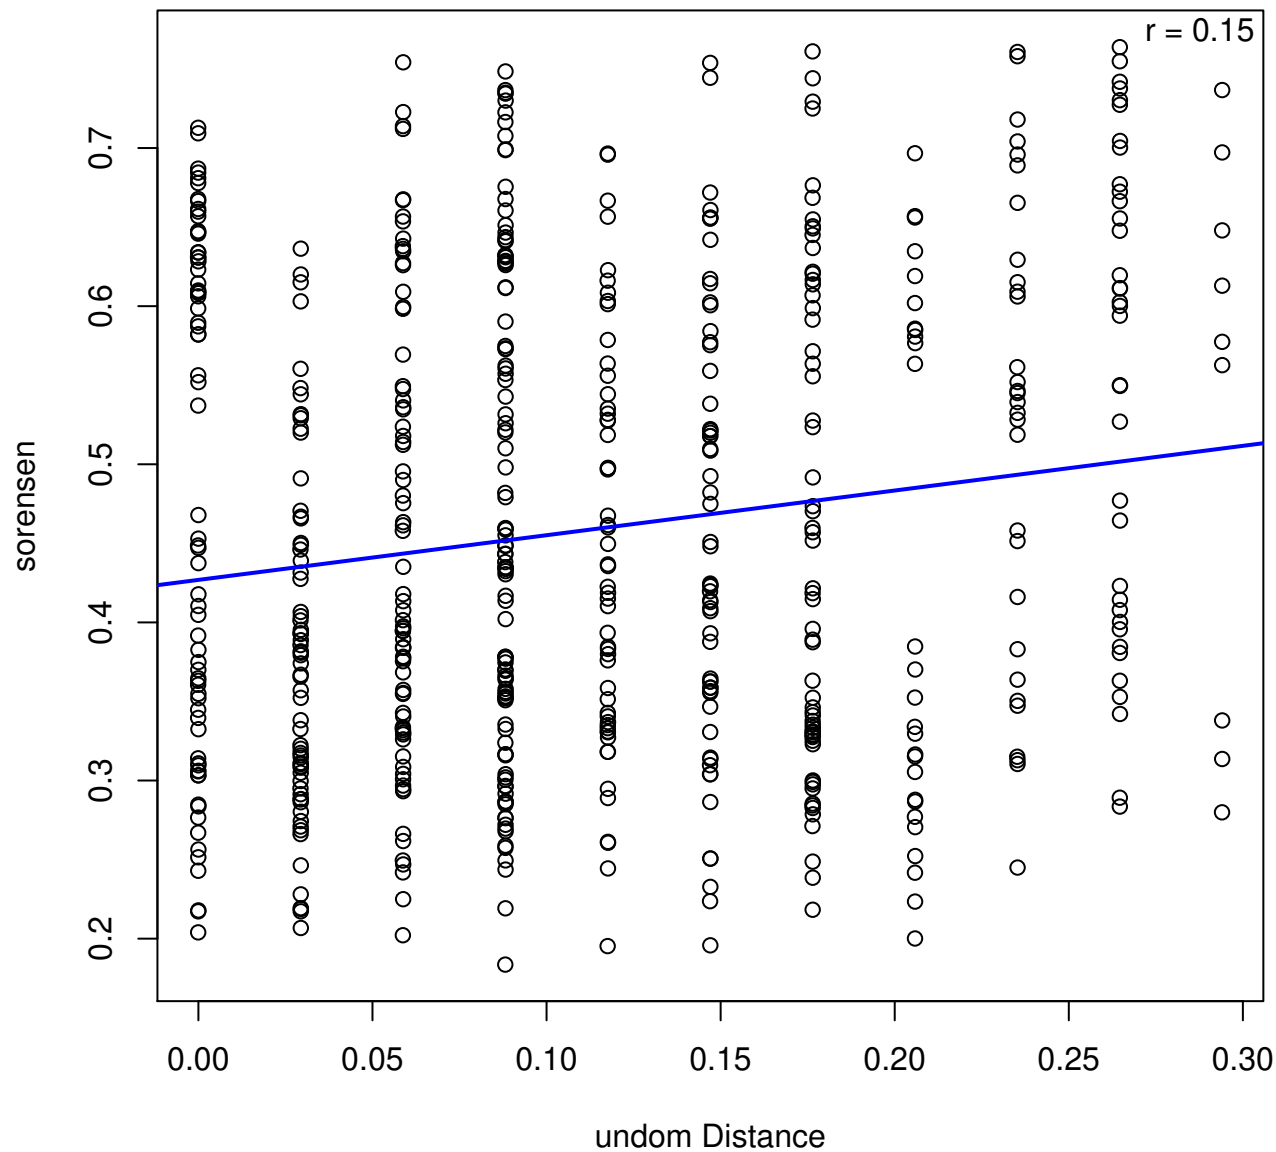

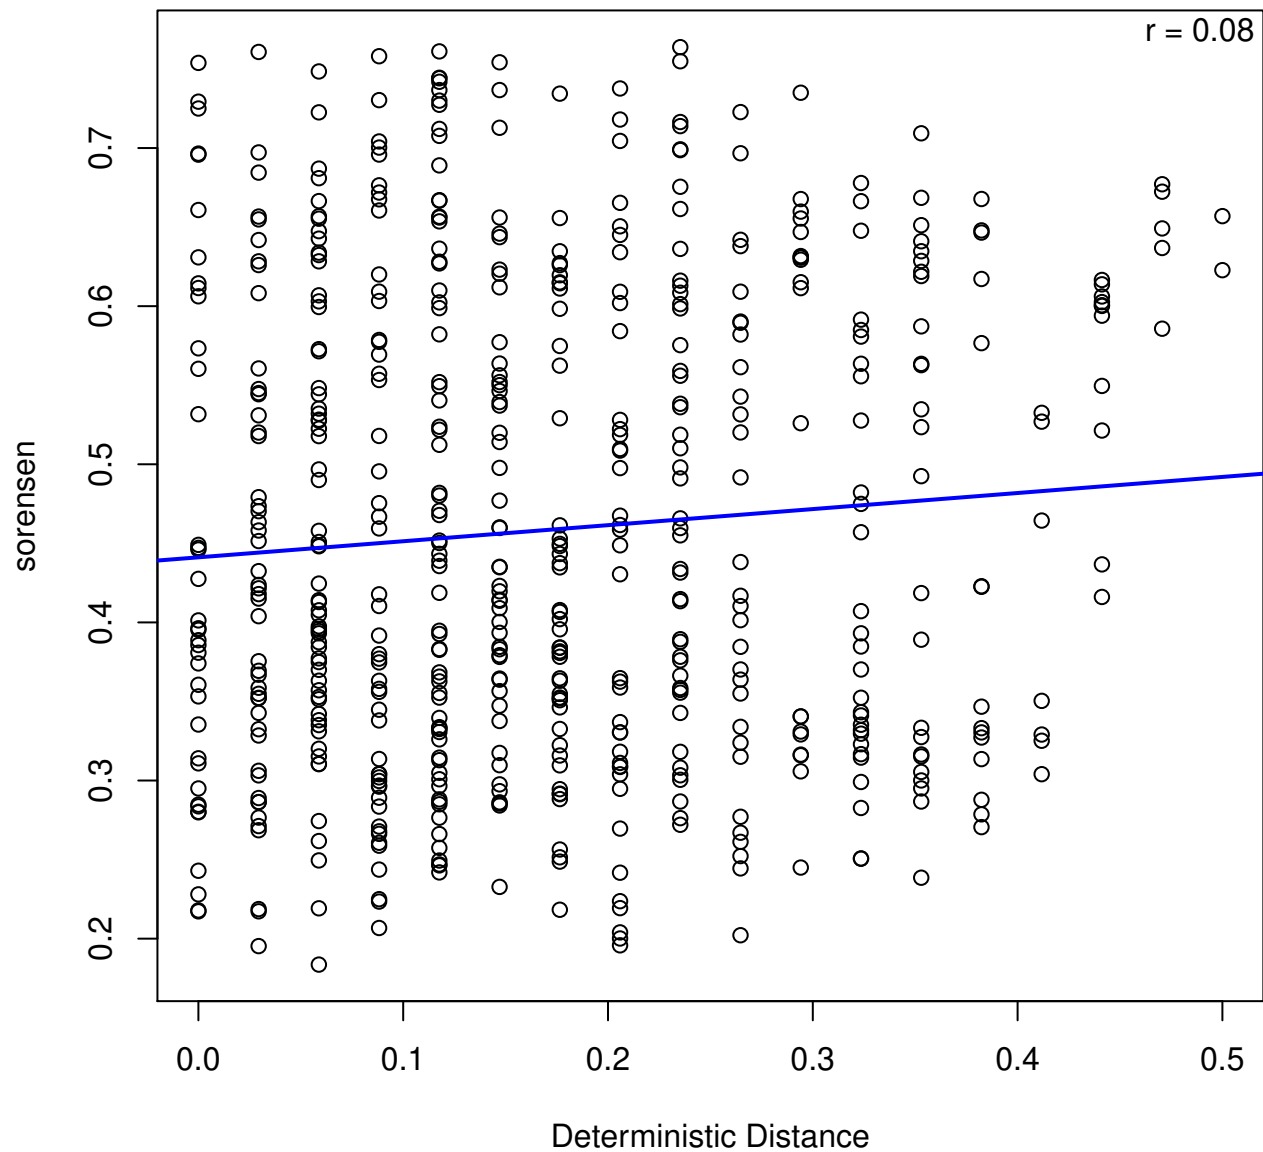

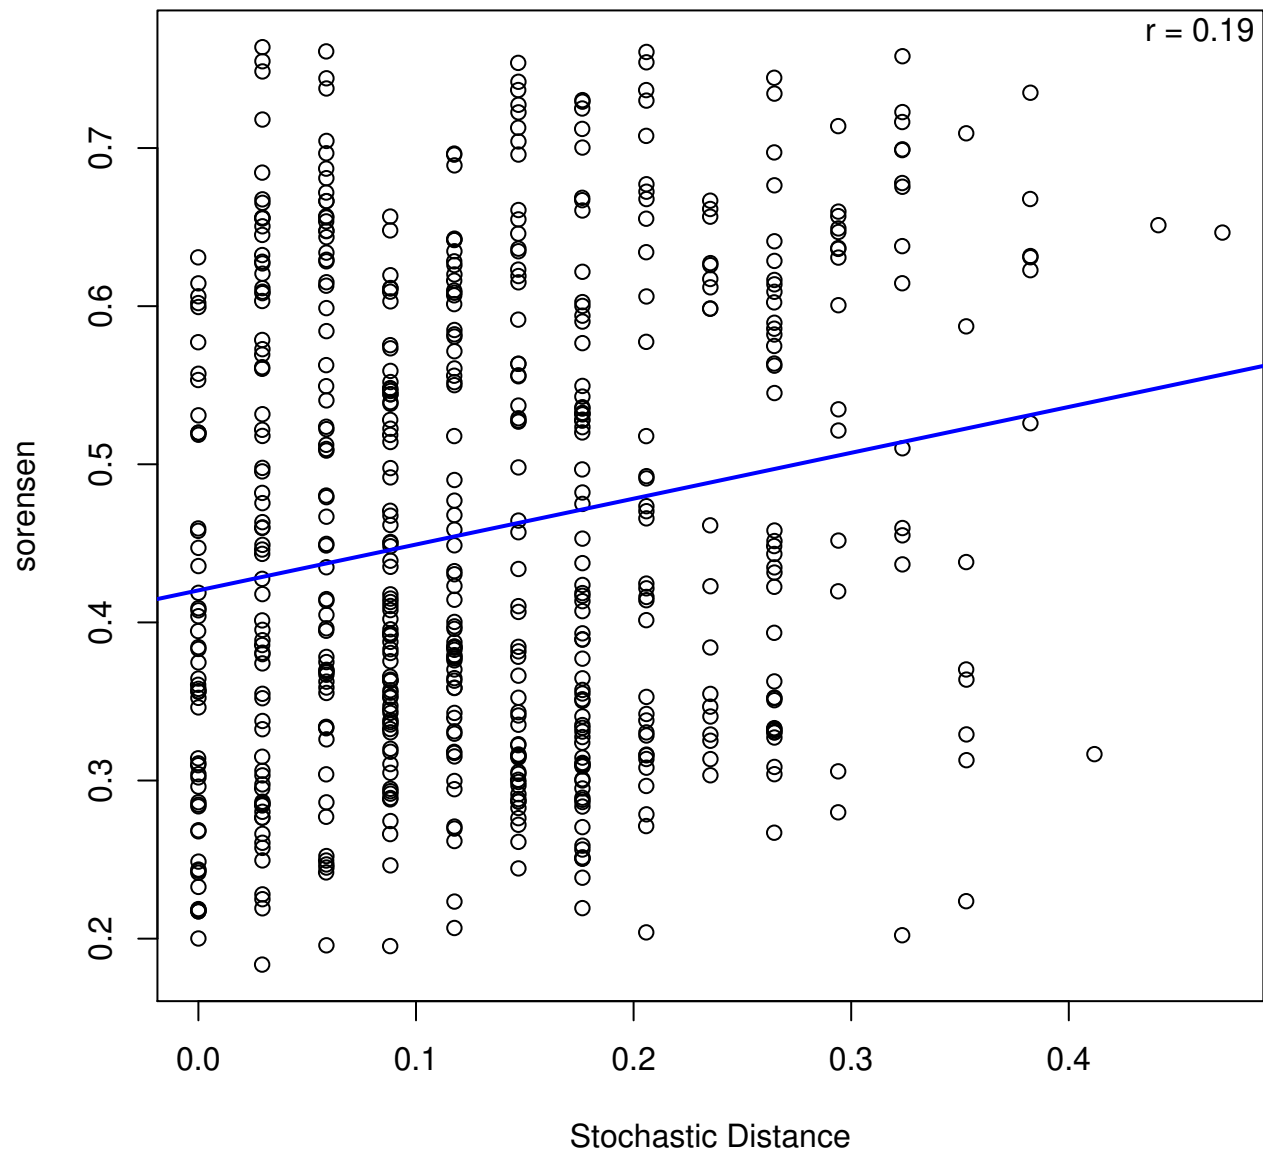

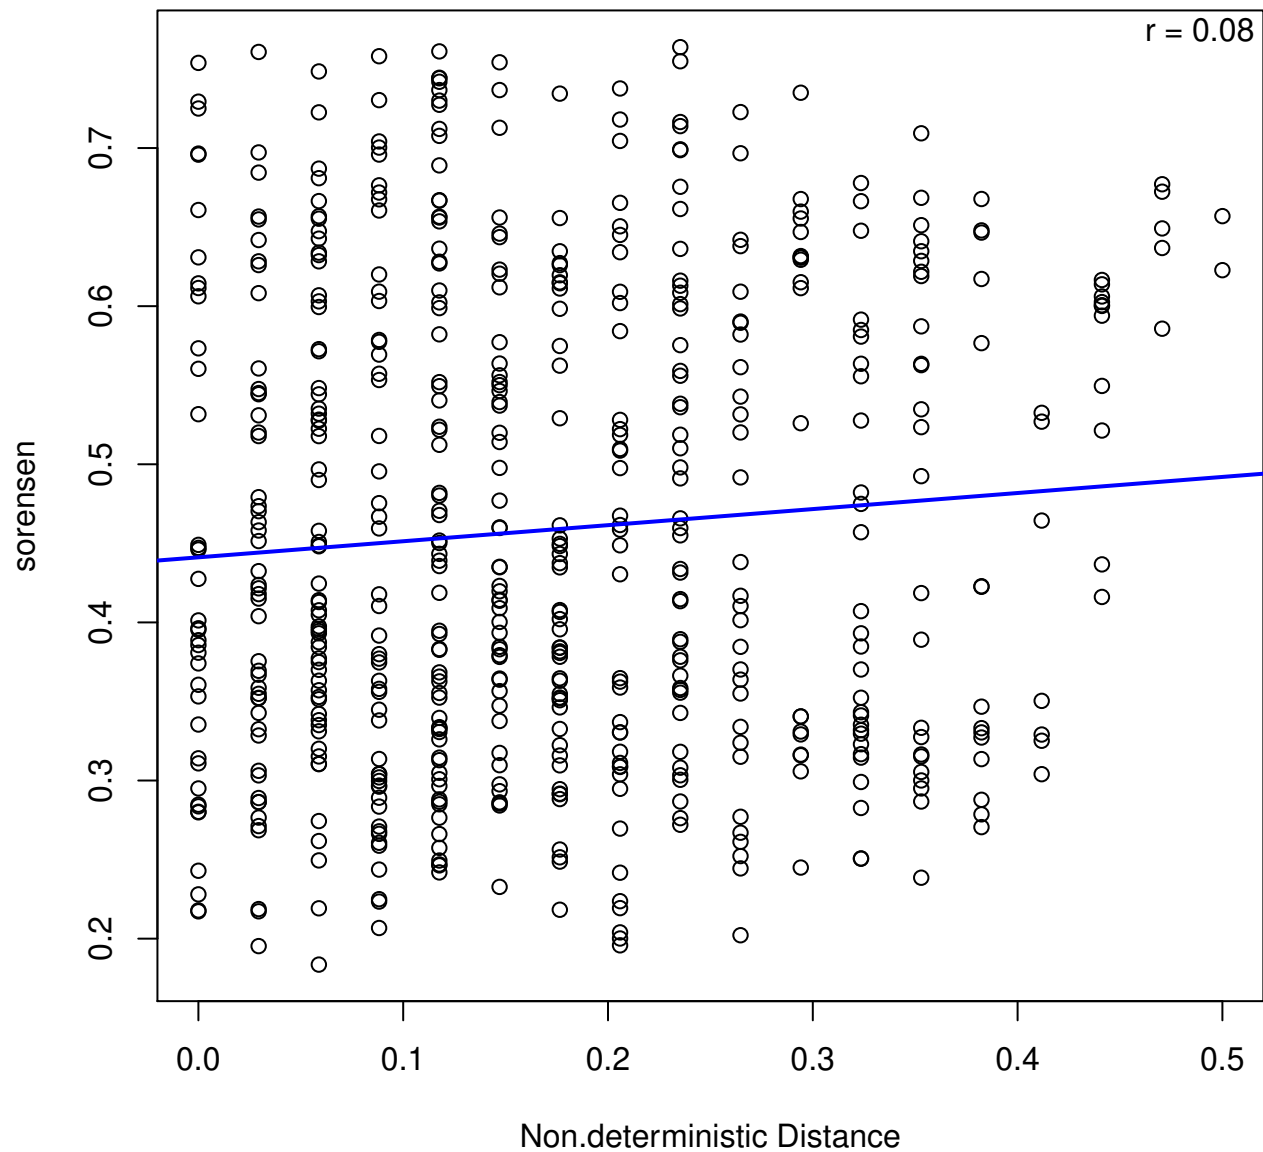

Table S1 Literature listing field-based natural salinity gradient studies, long-term field manipulations of salinity exposure, and lab-based incubation studies subjecting soils to varying levels of salinity

| Study                  | Year | Experiment                                                                                                                                                                                                                                                                | Carbon variables measured                                                     | Observation                                                                                                                                                                                                                                                                                                                                                                                                                                                                                                                                                                                                     | DOI                                                                                                                                                                         |
|------------------------|------|---------------------------------------------------------------------------------------------------------------------------------------------------------------------------------------------------------------------------------------------------------------------------|-------------------------------------------------------------------------------|-----------------------------------------------------------------------------------------------------------------------------------------------------------------------------------------------------------------------------------------------------------------------------------------------------------------------------------------------------------------------------------------------------------------------------------------------------------------------------------------------------------------------------------------------------------------------------------------------------------------|-----------------------------------------------------------------------------------------------------------------------------------------------------------------------------|
| Smith et al.           | 1983 | Field measurement of CO <sub>2</sub> flux in salt, brackish, freshwater marshes in Louisiana                                                                                                                                                                              | CO <sub>2</sub>                                                               | Decreased with increasing salinity                                                                                                                                                                                                                                                                                                                                                                                                                                                                                                                                                                              | 10.1016/0272-7714(83)90042-2                                                                                                                                                |
| Nyman and DeLaune      | 1991 | Effect of water table depths on CO <sub>2</sub> emissions were examined in intact fresh, brackish, and saline marsh soil cores                                                                                                                                            | CO <sub>2</sub>                                                               | Emissions greatest in fresh cores followed by brackish and then saline cores                                                                                                                                                                                                                                                                                                                                                                                                                                                                                                                                    | 10.4319/lo.1991.36.7.1406                                                                                                                                                   |
| Chmura et al.          | 2003 | Global carbon sequestration in tidal, saline wetland soils. 154 global datasets in mangroves and salt marshes were compiled.                                                                                                                                              | Soil carbon density                                                           | In contrast to peatlands, salt marshes and mangroves release negligible amounts of GHG and store more carbon per unit area                                                                                                                                                                                                                                                                                                                                                                                                                                                                                      | 10.1029/2002GB001917                                                                                                                                                        |
| Choi and Wang          | 2004 | Metaanalysis of carbon sequestration in coastal wetlands using radiocarbon measurements of field soil along a soil chronosequence in coastal wetland in north Florida                                                                                                     | CO <sub>2</sub>                                                               | Saltmarshes sink of CO <sub>2</sub>                                                                                                                                                                                                                                                                                                                                                                                                                                                                                                                                                                             | 10.1029/2004GB002261                                                                                                                                                        |
| Neubauer et al.        | 2005 | Brackish and freshwater marsh (Jug Bay), and tidal brackish high salinity marsh (Jack Bay) soil cores were collected for measurements.                                                                                                                                    | CH <sub>4</sub> , CO <sub>2</sub>                                             | CO <sub>2</sub> and CH <sub>4</sub> decreased at high salinity marsh site                                                                                                                                                                                                                                                                                                                                                                                                                                                                                                                                       | 10.1890/04-1951                                                                                                                                                             |
| Weston et al.          | 2006 | Sediments from tidal freshwater portion of Altamaha River subjected to salinity gradient in flow-through sediment reactors in the lab (0.063 vs 9.9 psu)                                                                                                                  | CO <sub>2</sub> , CH <sub>4</sub> , DOC                                       | CO <sub>2</sub> increased, CH <sub>4</sub> decreased, DOC and DON concentration did not change with increasing salinity.                                                                                                                                                                                                                                                                                                                                                                                                                                                                                        | 10.1029/2005JG000071                                                                                                                                                        |
| Baldwin et al.         | 2006 | Never impacted freshwater sediment collected from non-salt impacted freshwater wetland subjected to NaCl treatment in lab incubations                                                                                                                                     | CO <sub>2</sub> , CH <sub>4</sub>                                             | No noticeable effect of NaCl load on CO <sub>2</sub> production, CH <sub>4</sub> decreased with increasing NaCl conc                                                                                                                                                                                                                                                                                                                                                                                                                                                                                            | 10.1672/0277-5212(2006)26[455:tseos]2.0.co                                                                                                                                  |
| Chambers et al.        | 2011 | Short term response to salinity pulse in freshwater wetland soils exposed to seawater and NaCl pulsing in a batch incubation studies                                                                                                                                      | CO <sub>2</sub> , CH <sub>4</sub> , TOC, OC, Microbial Biomass C              | CO <sub>2</sub> increased and CH <sub>4</sub> decreased in response to seawater. NaCl treatment reduced CH <sub>4</sub> , no effect on CO <sub>2</sub>                                                                                                                                                                                                                                                                                                                                                                                                                                                          | 10.2136/sssaj2011.0026                                                                                                                                                      |
| Weston et al.          | 2011 | Tidal-freshwater marsh soils incubated in lab to tidal cycle of freshwater and dilute seawater                                                                                                                                                                            | CO <sub>2</sub> , CH <sub>4</sub>                                             | CO <sub>2</sub> and CH <sub>4</sub> increased                                                                                                                                                                                                                                                                                                                                                                                                                                                                                                                                                                   | 10.1007/s10533-010-9427-4                                                                                                                                                   |
| Tzortziou et al.       | 2011 | Brackish and freshwater marsh soil subjected to tidal upwelling at the Rhode River estuary-marsh in Chesapeake Bay                                                                                                                                                        | DOC, DIC, DOM, and CO <sub>2</sub> calculated from total DIC                  | DIC, DOC, pCO <sub>2</sub> was higher at marsh than estuary                                                                                                                                                                                                                                                                                                                                                                                                                                                                                                                                                     | 10.3354/meps09017                                                                                                                                                           |
| Marton et al.          | 2012 | Tidal freshwater forest soil cores collected along a organic matter gradient in Altamaha River>Ogeechee>Satilla in southeastern Georgia. These systems have not been exposed to prolonged saline water. Incubations were performed by adjusting salinity to 0.2, or 5 psu | CH <sub>4</sub> , CO <sub>2</sub>                                             | CO <sub>2</sub> increased (overall for Altamaha, treatment level 2 for Ogeechee, no effect in Satilla), CH <sub>4</sub> decreased with increasing salinity for all three rivers.                                                                                                                                                                                                                                                                                                                                                                                                                                | 10.1007/s13157-012-0270-3                                                                                                                                                   |
| Neubauer et al.        | 2013 | Tidal freshwater marsh soil with 3.5 year in situ salt manipulation (either increasing freshwater inputs or adding seawater) and short term lab incubations                                                                                                               | CO <sub>2</sub> , CH <sub>4</sub> ,                                           | CO <sub>2</sub> increased and CH <sub>4</sub> decreased short term with salinity, but CO <sub>2</sub> and CH <sub>4</sub> decreased long-term with salinity (was higher in the control and freshwater plots)                                                                                                                                                                                                                                                                                                                                                                                                    | 10.5194/bg-10-8171-2013                                                                                                                                                     |
| Chambers et al.        | 2013 | Intact soil cores from freshwater tidal, brackish and salt marsh exposed to 3 salinity pulses during 53 day lab experiment                                                                                                                                                | CO <sub>2</sub> , CH <sub>4</sub> , Total C, DOC, TOC                         | CO <sub>2</sub> from freshwater marsh increased, CO <sub>2</sub> from brackish and salt marsh decreased                                                                                                                                                                                                                                                                                                                                                                                                                                                                                                         | 10.1007/s10533-013-9841-5                                                                                                                                                   |
| Chambers et al.        | 2014 | Increased salinity (15 psu) and inundation (-8 c) and their combination on soil organic C loss mangrove peat soil that was collected and brought back outdoor tidal mesocosm facility                                                                                     | CO <sub>2</sub> , CH <sub>4</sub> , DOC                                       | No significant impact on soil organic C mineralization, though CO <sub>2</sub> increased in control water, elevated salinity than inundated, elevated salinity. No significant differences in CH <sub>4</sub> flux.                                                                                                                                                                                                                                                                                                                                                                                             | 10.1007/s10750-013-1764-6                                                                                                                                                   |
| Weston et al.          | 2014 | Saltwater marsh, Oligohaline and tidal freshwater coastal marshes along a salinity gradient at Delaware River Estuary over four years                                                                                                                                     | CO <sub>2</sub> , CH <sub>4</sub> , C sequestration with radiodating of soils | Saltwater marsh was C, CH <sub>4</sub> , GHG sink. Tidal freshwater marsh source of CH <sub>4</sub> , Oligohaline saline source of CO <sub>2</sub> and CH <sub>4</sub> . No difference in DOC                                                                                                                                                                                                                                                                                                                                                                                                                   | 10.1007/s10533-014-9989-7                                                                                                                                                   |
| Liu et al.             | 2017 | Freshwater forest wetland not affected by saltwater intrusion incubated in lab to water level (0.4-3.0 g/g) and salinity changes (0, 1, 5 ppt NaCl)                                                                                                                       | CH <sub>4</sub> , CO <sub>2</sub> , DOC                                       | Wet-dry cycles decreased DOC, increased CO <sub>2</sub> , decreased CH <sub>4</sub> . CO <sub>2</sub> -C vs DOC linear increase, CH <sub>4</sub> -C exponential increase. Cumulative emission of gases increased over time.                                                                                                                                                                                                                                                                                                                                                                                     | 10.1016/J.SOILBIO.2017.04.002                                                                                                                                               |
| Steinmuller & Chambers | 2018 | Intact freshwater wetland soil cores with site gradient (cypress dome, bayhead swamp, mineral marsh selected to capture variation in soil organic matter) brought back to lab and exposed to salinity gradient (5 and 15 psu)                                             | DOC, total C, Microbial biomass C, CO <sub>2</sub> and CH <sub>4</sub> flux   | CO <sub>2</sub> increased with increasing salinity in swamp soil with no change in CH <sub>4</sub> wrt salinity. DOC unaffected                                                                                                                                                                                                                                                                                                                                                                                                                                                                                 | 10.2136/sssaj2017.05.0162                                                                                                                                                   |
| Ardon et al.           | 2018 | Intact soil core from coastal forested wetland collected in 2010, subjected to marine salt treatment (5psu) and hydrologic treatment (flooded or water table kept 20 cm below surface) in lab.                                                                            | DOC, CO <sub>2</sub> , CH <sub>4</sub>                                        | No change in DOC. Increased salinity decreased CO <sub>2</sub> flux, CH <sub>4</sub> flux increased in salt treatments relative to control. (Both results were surprising, given the general trend from other studies and lit review).                                                                                                                                                                                                                                                                                                                                                                          | <a href="https://doi.org/10.1007/s10533-018-0486-2">https://doi.org/10.1007/s10533-018-0486-2</a>                                                                           |
| Hebert et al.          | 2018 | Chronic (15 psu) and acute (2 months of brackish) simulated seawater intrusion on tidal freshwater marsh                                                                                                                                                                  | CO <sub>2</sub> , CH <sub>4</sub> , DOC                                       | Press(constant/chronic) reduced CO <sub>2</sub> and CH <sub>4</sub> emissions, led to reduced carbon fixation, while acute pulses did not lead to lasting effects on porewater chemistry or ecosystem carbon balance. Gross ecosystem productivity, net ecosystem productivity, and ecosystem respiration was lower in press plots than control. Porewater DOC decreased in both press and pulse following seawater addition but increase 3-4 months afterwards (perhaps due to rapid increase in C mineralization via sulfate reduction, DOC flocculation or stress-induced reductions in C inputs from plant) | <a href="https://doi.org/10.1007/s10533-018-0436-z">https://doi.org/10.1007/s10533-018-0436-z</a>                                                                           |
| Yang et al.            | 2018 | Soil cores from brackish wetland incubated in lab with salinity gradient (fresh, 3, 5, and 10‰)                                                                                                                                                                           | DOC, CO <sub>2</sub>                                                          | High salinity treatments decreased soil respiration rates while for freshwater while for freshwater control and level 3 salinity, CO <sub>2</sub> first increased and then decreased), decreased DOC concentrations.                                                                                                                                                                                                                                                                                                                                                                                            | <a href="https://www.sciencedirect.com/science/article/pii/S0048969718321971?via%3DiHub">https://www.sciencedirect.com/science/article/pii/S0048969718321971?via%3DiHub</a> |

Table S2 Soil Chemistry Data (values are average of three replicates)

| Sample  | Location_depth     | Transect      | % Carbon | % Nitrogen | % Sulfur | NO3-N<br>(mg kg <sup>-1</sup> ) | NH4-N<br>(mg kg <sup>-1</sup> ) | pH   | Sp. conductivity<br>(μs/cm) | Bulk density<br>(g cc <sup>-1</sup> ) | Porosity | Volumetric<br>water content | % Sand | % Silt | % Clay |
|---------|--------------------|---------------|----------|------------|----------|---------------------------------|---------------------------------|------|-----------------------------|---------------------------------------|----------|-----------------------------|--------|--------|--------|
| BC2-10  | Floodplain_shallow | High-salt     | 25.1     | 1.33       | 0.19     | 4.97                            | 121                             | 6.56 | 867                         | 0.17                                  | 0.93     | 79.6                        | 31.8   | 34.1   | 64.8   |
| BC2-30  | Floodplain_deep    | High-salt     | 2.70     | 0.30       | 0.08     | 1.01                            | 20.4                            | 6.85 | 453                         | 0.62                                  | 0.77     | 38.2                        | 37.0   | 34.4   | 28.6   |
| BC3-10  | Floodplain_shallow | High-salt     | 31.0     | 2.04       | 0.37     | 2.24                            | 299                             | 6.18 | 794                         | 0.12                                  | 0.95     | 85.2                        | 24.9   | 41.5   | 33.6   |
| BC3-25  | Floodplain_deep    | High-salt     | 4.03     | 0.44       | 0.10     | 0.37                            | 30.6                            | 6.15 | 532                         | 0.57                                  | 0.79     | 55.0                        | 6.3    | 54.6   | 39.0   |
| BC4-10  | Inland_shallow     | High-salt     | 16.8     | 1.05       | 0.21     | 1.69                            | 28.0                            | 4.98 | 248                         | 0.21                                  | 0.92     | 78.9                        | 40.9   | 24.1   | 35.0   |
| BC4-30  | Inland_deep        | High-salt     | 6.18     | 0.49       | 0.17     | 0.44                            | 13.9                            | 4.79 | 524                         | 0.40                                  | 0.85     | 66.1                        | 8.8    | 50.5   | 40.8   |
| BC12-10 | Floodplain_shallow | Moderate-salt | 37.4     | 1.53       | 0.21     | 0.56                            | 67.0                            | 5.19 | 340                         | 0.10                                  | 0.96     | 77.2                        | 38.9   | 22.1   | 33.0   |
| BC12-30 | Floodplain_deep    | Moderate-salt | 2.42     | 0.27       | 0.08     | 0.34                            | 4.29                            | 6.06 | 260                         | 0.52                                  | 0.80     | 42.4                        | 4.1    | 54.0   | 42.0   |
| BC13-10 | Floodplain_shallow | Moderate-salt | 33.5     | 2.05       | 0.27     | 1.22                            | 210                             | 5.84 | 247                         | 0.16                                  | 0.94     | 81.1                        | 20.0   | 38.0   | 42.0   |
| BC13-19 | Floodplain_deep    | Moderate-salt | 4.72     | 0.47       | 0.10     | 0.51                            | 17.9                            | 5.82 | 148                         | 0.55                                  | 0.79     | 47.5                        | 4.4    | 47.8   | 47.8   |
| BC14-10 | Inland_shallow     | Moderate-salt | 15.6     | 1.13       | 0.23     | 1.36                            | 86.8                            | 5.63 | 206                         | 0.21                                  | 0.92     | 78.7                        | 46.6   | 21.4   | 32.0   |
| BC14-25 | Inland_deep        | Moderate-salt | 3.78     | 0.41       | 0.11     | 0.71                            | 18.1                            | 5.68 | 324                         | 0.47                                  | 0.82     | 58.1                        | 12.0   | 46.0   | 42.0   |
| BC15-10 | Upland_shallow     | Terrestrial   | 7.41     | 0.31       | 0.08     | 0.94                            | 27.0                            | 4.63 | 43.0                        | 0.49                                  | 0.81     | 44.8                        | 14.1   | 54.0   | 32.0   |
| BC15-30 | Upland_deep        | Terrestrial   | 2.14     | 0.18       | 0.12     | 0.54                            | 7.00                            | 4.83 | 29.2                        | 0.63                                  | 0.76     | 42.7                        | 12.2   | 57.9   | 29.9   |



Table S3 FTICR peaks of Water Soluble Organic Fraction (WSOC) processed through FREDa to obtain Gibbs Free Energy (GFE), relative abundance of compound classes and heteroatoms, and biochemical transformations

| Sample    | Depth   | Location | avgGFE (kJ mol C-1) | Protein | Amino Sugar | Lipid | Lignin | ConHC | Tannin | Other | Carb | UnsatHC | CHO | CHNO | CHOP | CHOS | CHNOS | CHNOP | CHNOSP | CHOSP | Total Transformations | Total Nitrogen transformations | Relative Nitrogen transformation | Relative Nitrogen containing formula |
|-----------|---------|----------|---------------------|---------|-------------|-------|--------|-------|--------|-------|------|---------|-----|------|------|------|-------|-------|--------|-------|-----------------------|--------------------------------|----------------------------------|--------------------------------------|
| BC2-10-1  | Shallow | BC2      | 64.93705            | 18.3    | 3.8         | 9.4   | 30     | 20    | 14     | 0.8   | 2.5  | 1.1     | 86  | 14   | 8.4  | 7.0  | 3.6   | 2.1   | 1.1    | 0.24  | 2293                  | 86                             | 0.04                             | 0.17                                 |
| BC2-10-2  | Shallow | BC2      | 63.61414            | 16.4    | 3.4         | 8.2   | 31     | 23    | 13     | 0.6   | 2.0  | 1.4     | 87  | 13   | 7.8  | 6.3  | 2.9   | 2.0   | 0.8    | 0.33  | 3234                  | 159                            | 0.05                             | 0.16                                 |
| BC2-10-3  | Shallow | BC2      | 64.22539            | 16.9    | 2.7         | 10.9  | 32     | 24    | 12     | 0.2   | 0.8  | 1.2     | 87  | 13   | 2.9  | 5.2  | 2.7   | 1.0   | 0.7    | 0.05  | 2685                  | 145                            | 0.05                             | 0.15                                 |
| BC3-10-1  | Shallow | BC3      | 66.48832            | 20.8    | 3.6         | 11.0  | 30     | 22    | 10     | 0.4   | 1.2  | 1.2     | 85  | 15   | 6.0  | 7.2  | 1.4   | 1.7   | 0.3    | 0.11  | 2755                  | 169                            | 0.06                             | 0.16                                 |
| BC3-10-2  | Shallow | BC3      | 66.80659            | 22.4    | 4.1         | 12.1  | 25     | 24    | 9      | 0.4   | 1.8  | 1.1     | 87  | 13   | 8.8  | 6.1  | 0.9   | 2.0   | 0.2    | 0.14  | 2063                  | 93                             | 0.05                             | 0.13                                 |
| BC4-10-1  | Shallow | BC4      | 53.69184            | 1.6     | 0.6         | 0.2   | 46     | 30    | 20     | 0.0   | 0.9  | 0.2     | 86  | 14   | 0.1  | 1.0  | 9.1   | 0.3   | 4.8    | 0.03  | 4144                  | 164                            | 0.04                             | 0.24                                 |
| BC4-10-2  | Shallow | BC4      | 53.46295            | 1.5     | 0.6         | 0.3   | 45     | 33    | 19     | 0.0   | 0.8  | 0.3     | 83  | 17   | 0.2  | 1.4  | 10    | 0.8   | 5.5    | 0.09  | 4373                  | 218                            | 0.05                             | 0.28                                 |
| BC4-10-3  | Shallow | BC4      | 53.59828            | 1.7     | 0.7         | 0.3   | 45     | 33    | 18     | 0.1   | 0.8  | 0.2     | 82  | 18   | 0.2  | 1.7  | 11    | 0.7   | 6.4    | 0.11  | 4822                  | 273                            | 0.06                             | 0.30                                 |
| BC12-10-1 | Shallow | BC12     | 57.81569            | 8.0     | 2.5         | 4.3   | 37     | 32    | 14     | 0.2   | 1.4  | 0.8     | 88  | 12   | 2.5  | 1.9  | 6.2   | 0.6   | 2.4    | 0.12  | 3494                  | 104                            | 0.03                             | 0.19                                 |
| BC12-10-2 | Shallow | BC12     | 58.02936            | 7.9     | 1.8         | 4.3   | 39     | 30    | 15     | 0.1   | 1.2  | 0.6     | 86  | 14   | 2.1  | 2.0  | 7.1   | 0.9   | 3.4    | 0.04  | 3691                  | 148                            | 0.04                             | 0.22                                 |
| BC12-10-3 | Shallow | BC12     | 56.53031            | 7.0     | 1.1         | 3.3   | 39     | 32    | 17     | 0.1   | 0.9  | 0.6     | 83  | 17   | 1.3  | 1.1  | 7.3   | 0.9   | 3.6    | 0.12  | 5063                  | 313                            | 0.06                             | 0.25                                 |
| BC13-10-1 | Shallow | BC13     | 58.11019            | 11.5    | 2.3         | 5.3   | 33     | 30    | 16     | 0.1   | 0.9  | 1.0     | 83  | 17   | 2.4  | 2.5  | 3.6   | 1.1   | 1.2    | 0     | 3157                  | 255                            | 0.08                             | 0.21                                 |
| BC13-10-2 | Shallow | BC13     | 59.44556            | 14.0    | 2.8         | 5.4   | 34     | 27    | 15     | 0.2   | 1.0  | 0.8     | 79  | 21   | 2.6  | 4.3  | 5.2   | 0.8   | 2.5    | 0     | 3856                  | 376                            | 0.10                             | 0.25                                 |
| BC13-10-3 | Shallow | BC13     | 61.09489            | 14.6    | 2.2         | 7.1   | 33     | 28    | 13     | 0.2   | 0.7  | 1.0     | 81  | 19   | 2.0  | 3.4  | 4.1   | 1.1   | 1.8    | 0.04  | 4368                  | 393                            | 0.09                             | 0.23                                 |
| BC14-10-1 | Shallow | BC14     | 53.89356            | 6.4     | 1.8         | 1.9   | 37     | 36    | 16     | 0.1   | 0.9  | 0.5     | 79  | 21   | 1.3  | 5.9  | 7.4   | 0.8   | 3.9    | 0.06  | 5406                  | 486                            | 0.09                             | 0.28                                 |
| BC14-10-2 | Shallow | BC14     | 52.9046             | 6.0     | 1.7         | 1.3   | 37     | 36    | 17     | 0.3   | 0.7  | 0.4     | 77  | 23   | 0.5  | 6.6  | 8.3   | 1.2   | 4.5    | 0.14  | 5461                  | 509                            | 0.09                             | 0.31                                 |
| BC14-10-3 | Shallow | BC14     | 53.26191            | 5.9     | 1.6         | 1.8   | 37     | 35    | 17     | 0.2   | 0.7  | 0.6     | 77  | 23   | 0.5  | 7.7  | 7.3   | 1.2   | 3.5    | 0.03  | 5510                  | 580                            | 0.11                             | 0.29                                 |
| BC15-10-1 | Shallow | BC15     | 67.32013            | 3.3     | 1.5         | 1.3   | 52     | 18    | 21     | 0.2   | 1.5  | 0.6     | 82  | 18   | 3.0  | 1.4  | 12    | 1.0   | 8.3    | 0.25  | 4434                  | 163                            | 0.04                             | 0.31                                 |
| BC15-10-2 | Shallow | BC15     | 68.81566            | 4.4     | 2.0         | 1.3   | 51     | 18    | 21     | 0.3   | 1.7  | 0.6     | 83  | 17   | 3.0  | 2.3  | 13    | 1.0   | 8.4    | 0.26  | 4281                  | 116                            | 0.03                             | 0.31                                 |
| BC15-10-3 | Shallow | BC15     | 70.52464            | 3.4     | 1.0         | 1.2   | 52     | 19    | 21     | 0.2   | 1.2  | 0.3     | 82  | 18   | 1.4  | 1.4  | 13    | 1.2   | 9.1    | 0.39  | 4397                  | 154                            | 0.04                             | 0.33                                 |
| BC2-30-1  | Deep    | BC2      | 51.96419            | 2.1     | 0.7         | 1.4   | 39     | 31    | 25     | 0.2   | 1.1  | 0.1     | 78  | 22   | 1.0  | 1.8  | 10    | 0.8   | 6.3    | 0.41  | 4333                  | 350                            | 0.08                             | 0.33                                 |
| BC2-30-2  | Deep    | BC2      | 53.09664            | 2.3     | 0.2         | 1.8   | 41     | 25    | 28     | 0.1   | 1.0  | 0.5     | 89  | 11   | 0.4  | 1.3  | 7.2   | 0.5   | 4.0    | 0.22  | 1733                  | 28                             | 0.02                             | 0.20                                 |
| BC2-30-3  | Deep    | BC2      | 53.94344            | 2.5     | 0.4         | 1.4   | 44     | 26    | 24     | 0.2   | 1.2  | 0.2     | 83  | 17   | 0.6  | 1.3  | 9.8   | 0.6   | 5.5    | 0.16  | 3160                  | 143                            | 0.05                             | 0.28                                 |
| BC3-25-1  | Deep    | BC3      | 52.32721            | 3.7     | 0.2         | 3.8   | 32     | 34    | 25     | 0.4   | 0.7  | 0.4     | 89  | 11   | 0.6  | 1.4  | 6.4   | 0.5   | 3.1    | 0.19  | 1360                  | 28                             | 0.02                             | 0.19                                 |
| BC3-25-2  | Deep    | BC3      | 53.08825            | 3.7     | 0.4         | 3.2   | 36     | 32    | 23     | 0.3   | 1.0  | 0.2     | 82  | 18   | 0.6  | 1.4  | 7.8   | 0.4   | 3.9    | 0.13  | 2958                  | 186                            | 0.06                             | 0.27                                 |
| BC3-25-3  | Deep    | BC3      | 51.0188             | 2.3     | 0.4         | 2.3   | 34     | 35    | 25     | 0.3   | 1.0  | 0.1     | 78  | 22   | 0.8  | 1.1  | 10    | 1.0   | 5.9    | 0.04  | 3579                  | 268                            | 0.07                             | 0.33                                 |
| BC4-30-1  | Deep    | BC4      | 54.51698            | 2.4     | 0.8         | 0.6   | 48     | 31    | 16     | 0.3   | 0.8  | 0.3     | 81  | 19   | 0.6  | 9.0  | 8.9   | 0.9   | 5.5    | 0.24  | 5515                  | 363                            | 0.07                             | 0.27                                 |
| BC4-30-2  | Deep    | BC4      | 56.75285            | 3.1     | 0.7         | 0.6   | 54     | 24    | 16     | 0.2   | 0.7  | 0.3     | 85  | 15   | 1.9  | 8.7  | 6.8   | 0.3   | 4.1    | 0.15  | 5309                  | 331                            | 0.06                             | 0.21                                 |
| BC4-30-3  | Deep    | BC4      | 55.50154            | 2.8     | 0.9         | 0.7   | 50     | 28    | 17     | 0.2   | 0.6  | 0.2     | 83  | 17   | 1.3  | 9.6  | 6.8   | 0.5   | 4.3    | 0.11  | 5628                  | 407                            | 0.07                             | 0.23                                 |
| BC12-30-1 | Deep    | BC12     | 52.65896            | 1.8     | 0.5         | 1.3   | 42     | 31    | 22     | 0.2   | 1.2  | 0.2     | 79  | 21   | 0.6  | 0.9  | 9.8   | 0.5   | 5.7    | 0.17  | 3840                  | 301                            | 0.08                             | 0.32                                 |
| BC12-30-2 | Deep    | BC12     | 54.73211            | 3.3     | 0.2         | 2.0   | 45     | 24    | 24     | 0.2   | 1.1  | 0.4     | 88  | 12   | 0.4  | 1.1  | 8.2   | 0.2   | 4.8    | 0.20  | 1257                  | 25                             | 0.02                             | 0.22                                 |
| BC12-30-3 | Deep    | BC12     | 52.90291            | 1.8     | 0.5         | 1.0   | 43     | 30    | 22     | 0.1   | 1.3  | 0.3     | 77  | 23   | 0.5  | 1.0  | 11    | 0.8   | 6.2    | 0.17  | 4704                  | 369                            | 0.08                             | 0.34                                 |
| BC13-19-1 | Deep    | BC13     | 53.4101             | 2.9     | 0.5         | 1.9   | 41     | 33    | 20     | 0.2   | 0.8  | 0.2     | 79  | 21   | 0.6  | 1.5  | 7.9   | 0.5   | 4.6    | 0.24  | 4899                  | 418                            | 0.09                             | 0.29                                 |
| BC13-19-2 | Deep    | BC13     | 53.21399            | 3.5     | 0.7         | 1.7   | 40     | 33    | 19     | 0.2   | 0.8  | 0.2     | 77  | 23   | 0.6  | 2.2  | 9.8   | 0.9   | 5.9    | 0.28  | 5279                  | 510                            | 0.10                             | 0.33                                 |
| BC13-19-3 | Deep    | BC13     | 53.58759            | 4.0     | 0.6         | 2.4   | 38     | 35    | 18     | 0.3   | 0.8  | 0.4     | 77  | 23   | 1.0  | 2.3  | 9.5   | 1.0   | 6.2    | 0.39  | 4682                  | 405                            | 0.09                             | 0.33                                 |
| BC14-25-1 | Deep    | BC14     | 52.63258            | 1.5     | 0.7         | 0.5   | 43     | 33    | 20     | 0.1   | 1.2  | 0.2     | 79  | 21   | 0.6  | 3.7  | 9.3   | 0.7   | 5.5    | 0.14  | 5110                  | 405                            | 0.08                             | 0.30                                 |
| BC14-25-2 | Deep    | BC14     | 53.146              | 1.7     | 0.7         | 0.5   | 44     | 32    | 19     | 0.2   | 1.0  | 0.2     | 78  | 22   | 0.5  | 4.6  | 11    | 1.1   | 6.8    | 0.37  | 4907                  | 394                            | 0.08                             | 0.33                                 |
| BC14-25-3 | Deep    | BC14     | 53.41649            | 1.9     | 0.8         | 0.8   | 44     | 32    | 19     | 0.3   | 0.9  | 0.3     | 75  | 25   | 0.6  | 4.9  | 11    | 1.4   | 7.4    | 0.33  | 5090                  | 451                            | 0.09                             | 0.36                                 |
| BC15-30-1 | Deep    | BC15     | 67.32013            | 7.9     | 1.9         | 4.1   | 63     | 7.1   | 12     | 0.7   | 0.9  | 2.6     | 86  | 14   | 11.5 | 2.9  | 4.9   | 0.9   | 1.4    | 0.28  | 2824                  | 118                            | 0.04                             | 0.19                                 |
| BC15-30-2 | Deep    | BC15     | 68.81556            | 8.7     | 2.0         | 4.2   | 68     | 4.1   | 9      | 0.9   | 0.6  | 2.4     | 84  | 16   | 12.4 | 3.3  | 5.0   | 1.1   | 1.4    | 0.39  | 2016                  | 92                             | 0.05                             | 0.16                                 |
| BC15-30-3 | Deep    | BC15     | 70.52464            | 11.9    | 3.7         | 5.8   | 61     | 4.0   | 8      | 0.6   | 1.6  | 2.8     | 86  | 14   | 13.0 | 3.9  | 3.8   | 1.1   | 0.5    | 0.27  | 1888                  | 52                             | 0.03                             | 0.33                                 |

Abbreviations: Condensed hydrocarbon (ConHC), Carbohydrates (Carb), Unsaturated hydrocarbon (UnsatHC)

Table S4 FTICR peaks of CHC13 fraction processed through FREDa to obtain Gibbs Free Energy (GFE), relative abundance of compound classes and heteroatoms, and biochemical transformations

| Sample    | Depth   | Location | avgGFE (kJ<br>mol <sup>-1</sup> C <sup>-1</sup> ) | Lipid | Protein | Lignin | Carb | AminoS<br>ugar | UnsatHC | ConiHC | Other | Tannin | CHO  | CHOS | CHOP | CHNOS | CHNO | CHNOP | CHNOSP | CHOSP | Total<br>transformations | Total Nitrogen<br>transformations | Relative Nitrogen<br>transformations | Relative Nitrogen<br>containing formula |
|-----------|---------|----------|---------------------------------------------------|-------|---------|--------|------|----------------|---------|--------|-------|--------|------|------|------|-------|------|-------|--------|-------|--------------------------|-----------------------------------|--------------------------------------|-----------------------------------------|
| BC2-10-1  | Shallow | BC2      | 108                                               | 100   | 0       | 0      | 0    | 0              | 0       | 0      | 0.00  | 92.3   | 23.1 | 7.7  | 0.0  | 7.7   | 0.0  | 0.0   | 0.0    | 0.0   | 1.0                      | 20                                | 0.11                                 | 0.06                                    |
| BC2-10-2  | Shallow | BC2      | 104                                               | 88.8  | 4.20    | 3.03   | 0.47 | 0.00           | 2.56    | 0.93   | 0     | 0.00   | 77.9 | 19.6 | 12.8 | 8.4   | 22.1 | 5.8   | 0.7    | 1.6   | 186                      | 31                                | 0.12                                 | 0.25                                    |
| BC2-10-3  | Shallow | BC2      | 106                                               | 96.3  | 0.61    | 0.61   | 0.00 | 0.00           | 2.13    | 0.30   | 0     | 0.00   | 88.1 | 27.4 | 7.9  | 5.5   | 11.9 | 1.8   | 0.6    | 0.6   | 111                      | 17                                | 0.08                                 | 0.14                                    |
| BC3-10-1  | Shallow | BC3      | 105                                               | 92.5  | 3.73    | 1.36   | 0.00 | 0.00           | 2.03    | 0.34   | 0     | 0.00   | 87.8 | 10.5 | 12.9 | 4.1   | 12.2 | 3.4   | 0.0    | 1.7   | 249                      | 1.0                               | 0.17                                 | 0.15                                    |
| BC3-10-2  | Shallow | BC3      | 105                                               | 94.4  | 1.39    | 1.05   | 0.00 | 0.00           | 2.44    | 0.70   | 0     | 0.00   | 83.3 | 13.2 | 11.8 | 3.8   | 16.7 | 3.5   | 0.0    | 1.0   | 326                      | 0                                 | 0.00                                 | 0.18                                    |
| BC3-10-3  | Shallow | BC3      | 105                                               | 92.5  | 3.76    | 1.25   | 0.00 | 0.00           | 1.88    | 0.63   | 0     | 0.00   | 84.3 | 14.7 | 11.9 | 5.6   | 15.7 | 1.9   | 0.3    | 1.6   | 347                      | 1.0                               | 0.02                                 | 0.17                                    |
| BC4-10-1  | Shallow | BC4      | 102                                               | 82.0  | 7.52    | 5.64   | 0.19 | 0.38           | 3.01    | 0.94   | 0     | 0.38   | 71.8 | 12.0 | 18.2 | 10.3  | 28.2 | 8.1   | 0.6    | 0.6   | 316                      | 19                                | 0.10                                 | 0.31                                    |
| BC4-10-2  | Shallow | BC4      | 103                                               | 88.1  | 5.54    | 3.48   | 0.00 | 0.16           | 2.06    | 0.47   | 0     | 0.16   | 77.4 | 15.8 | 12.5 | 7.0   | 22.6 | 7.4   | 0.2    | 0.8   | 334                      | 8.0                               | 0.05                                 | 0.26                                    |
| BC4-10-3  | Shallow | BC4      | 104                                               | 93.4  | 2.13    | 2.98   | 0.00 | 0.00           | 0.64    | 0.21   | 0     | 0.21   | 80.4 | 24.9 | 4.9  | 8.7   | 19.6 | 3.6   | 0.2    | 2.3   | 223                      | 6.0                               | 0.07                                 | 0.22                                    |
| BC12-10-1 | Shallow | BC12     | 105                                               | 91.4  | 5.17    | 1.44   | 0.00 | 0.00           | 2.01    | 0.00   | 0     | 0.00   | 83.0 | 16.4 | 13.2 | 4.6   | 17.0 | 5.5   | 0.6    | 1.4   | 144                      | 3.0                               | 0.03                                 | 0.19                                    |
| BC12-10-2 | Shallow | BC12     | 104                                               | 87.6  | 6.75    | 2.83   | 0.00 | 0.00           | 2.40    | 0.44   | 0     | 0.00   | 73.2 | 13.3 | 14.2 | 8.7   | 26.8 | 8.1   | 0.0    | 0.7   | 324                      | 8.0                               | 0.04                                 | 0.30                                    |
| BC12-10-3 | Shallow | BC12     | 104                                               | 89.1  | 4.77    | 2.52   | 0.00 | 0.13           | 3.18    | 0.26   | 0     | 0.00   | 78.9 | 15.8 | 13.9 | 5.4   | 21.1 | 7.8   | 0.1    | 0.7   | 451                      | 13                                | 0.06                                 | 0.24                                    |
| BC13-10-1 | Shallow | BC13     | 105                                               | 91.5  | 4.48    | 0.64   | 0.21 | 0.00           | 2.56    | 0.64   | 0     | 0.00   | 80.8 | 17.3 | 14.7 | 5.8   | 19.2 | 6.0   | 0.0    | 1.1   | 174                      | 31                                | 0.08                                 | 0.21                                    |
| BC13-10-2 | Shallow | BC13     | 105                                               | 91.7  | 3.67    | 1.22   | 0.00 | 0.00           | 3.18    | 0.24   | 0     | 0.00   | 81.2 | 13.9 | 12.5 | 6.4   | 18.8 | 5.4   | 0.0    | 1.0   | 257                      | 31                                | 0.12                                 | 0.22                                    |
| BC13-10-3 | Shallow | BC13     | 104                                               | 92.9  | 2.53    | 1.01   | 0.34 | 0.00           | 2.69    | 0.34   | 0     | 0.17   | 83.2 | 16.3 | 12.1 | 4.7   | 16.8 | 5.6   | 0.3    | 1.0   | 368                      | 12                                | 0.08                                 | 0.20                                    |
| BC14-10-1 | Shallow | BC14     | 105                                               | 90.3  | 4.12    | 0.97   | 0.24 | 0.00           | 2.91    | 1.21   | 0.04  | 0.00   | 78.0 | 16.7 | 17.4 | 9.4   | 22.0 | 6.3   | 0.5    | 1.5   | 195                      | 5.0                               | 0.05                                 | 0.25                                    |
| BC14-10-2 | Shallow | BC14     | 105                                               | 88.7  | 6.05    | 1.01   | 0.25 | 0.00           | 3.27    | 0.50   | 0.25  | 0.00   | 74.8 | 14.9 | 13.9 | 9.1   | 25.2 | 9.1   | 0.3    | 1.3   | 219                      | 14                                | 0.09                                 | 0.29                                    |
| BC14-10-3 | Shallow | BC14     | 105                                               | 94.4  | 2.65    | 0.53   | 0.00 | 0.00           | 2.25    | 0.13   | 0.00  | 0.00   | 76.6 | 14.9 | 14.4 | 6.0   | 23.4 | 8.3   | 0.3    | 0.8   | 349                      | 0                                 | 0.00                                 | 0.26                                    |
| BC15-10-1 | Shallow | BC15     | 104                                               | 90.8  | 3.90    | 2.51   | 0.56 | 0.00           | 1.67    | 0.28   | 0.00  | 0.28   | 83.6 | 10.6 | 15.3 | 6.1   | 16.4 | 3.9   | 1.1    | 0.6   | 145                      | 15                                | 0.07                                 | 0.20                                    |
| BC15-10-2 | Shallow | BC15     | 103                                               | 90.3  | 3.23    | 2.93   | 0.00 | 0.00           | 1.76    | 0.29   | 1.17  | 0.29   | 85.3 | 10.6 | 9.7  | 5.9   | 14.7 | 2.9   | 0.6    | 0.9   | 118                      | 10                                | 0.04                                 | 0.18                                    |
| BC15-10-3 | Shallow | BC15     | 104                                               | 93.4  | 1.62    | 2.36   | 0.44 | 0.00           | 1.47    | 0.29   | 0.44  | 0.00   | 86.1 | 10.3 | 13.6 | 3.5   | 13.9 | 4.1   | 0.3    | 0.4   | 266                      | 0.0                               | 0.00                                 | 0.16                                    |
| BC2-30-1  | Deep    | BC2      | 103                                               | 88.1  | 6.11    | 2.25   | 0.64 | 0.32           | 1.29    | 0.64   | 0.64  | 0.00   | 72.7 | 14.8 | 17.0 | 11.6  | 27.3 | 5.5   | 1.6    | 2.9   | 182                      | 20                                | 0.11                                 | 0.30                                    |
| BC2-30-2  | Deep    | BC2      | 105                                               | 92.6  | 2.81    | 0.66   | 0.66 | 0.17           | 2.48    | 0.33   | 0.17  | 0.17   | 82.5 | 16.2 | 16.0 | 5.3   | 17.5 | 8.1   | 0.5    | 1.2   | 251                      | 31                                | 0.12                                 | 0.21                                    |
| BC2-30-3  | Deep    | BC2      | 104                                               | 91.3  | 3.52    | 2.35   | 0.23 | 0.47           | 1.17    | 0.70   | 0.00  | 0.23   | 77.5 | 15.0 | 17.1 | 8.2   | 22.5 | 8.5   | 0.7    | 1.6   | 204                      | 17                                | 0.08                                 | 0.26                                    |
| BC3-25-1  | Deep    | BC3      | 97                                                | 77.8  | 4.44    | 6.67   | 2.22 | 2.22           | 2.22    | 0.00   | 2.22  | 2.22   | 77.8 | 22.2 | 4.4  | 15.6  | 22.2 | 2.2   | 4.4    | 2.2   | 6.0                      | 1.0                               | 0.17                                 | 0.29                                    |
| BC3-25-2  | Deep    | BC3      | 101                                               | 89.1  | 1.82    | 5.45   | 0.00 | 0.00           | 0.00    | 0.00   | 3.64  | 0.00   | 89.1 | 9.1  | 7.3  | 7.3   | 10.9 | 1.8   | 3.6    | 0.0   | 15                       | 0                                 | 0.00                                 | 0.18                                    |
| BC3-25-3  | Deep    | BC3      | 103                                               | 88.9  | 4.17    | 0.69   | 0.69 | 0.00           | 4.17    | 0.00   | 1.39  | 0.00   | 71.5 | 18.1 | 6.9  | 10.4  | 28.5 | 6.9   | 2.8    | 3.5   | 65                       | 1.0                               | 0.02                                 | 0.33                                    |
| BC4-30-1  | Deep    | BC4      | 103                                               | 89.5  | 2.81    | 4.68   | 0.47 | 0.78           | 1.09    | 0.31   | 0.16  | 0.16   | 83.5 | 18.6 | 12.8 | 3.6   | 16.5 | 5.3   | 0.3    | 1.1   | 194                      | 19                                | 0.10                                 | 0.18                                    |
| BC4-30-2  | Deep    | BC4      | 101                                               | 75.7  | 8.37    | 5.70   | 2.28 | 1.14           | 4.18    | 1.52   | 1.14  | 0.00   | 74.1 | 16.0 | 17.9 | 11.4  | 25.9 | 5.7   | 3.4    | 3.0   | 172                      | 8.0                               | 0.05                                 | 0.29                                    |
| BC4-30-3  | Deep    | BC4      | 104                                               | 91.3  | 3.79    | 2.62   | 0.29 | 0.00           | 0.87    | 0.58   | 0.29  | 0.29   | 82.5 | 19.2 | 8.7  | 5.2   | 17.5 | 4.1   | 0.6    | 1.2   | 88                       | 6.0                               | 0.07                                 | 0.20                                    |
| BC12-30-1 | Deep    | BC12     | 102                                               | 79.6  | 5.97    | 3.48   | 2.49 | 1.00           | 4.48    | 1.99   | 1.00  | 0.00   | 82.1 | 14.4 | 22.9 | 6.5   | 17.9 | 3.0   | 2.0    | 2.0   | 103                      | 3.0                               | 0.03                                 | 0.19                                    |
| BC12-30-2 | Deep    | BC12     | 101                                               | 78.9  | 7.75    | 4.23   | 1.76 | 0.70           | 4.23    | 1.41   | 1.06  | 0.00   | 72.9 | 14.4 | 20.4 | 12.3  | 27.1 | 4.2   | 3.9    | 3.9   | 184                      | 8.0                               | 0.04                                 | 0.30                                    |
| BC12-30-3 | Deep    | BC12     | 101                                               | 77.5  | 10.18   | 3.92   | 2.09 | 1.04           | 2.61    | 2.09   | 0.26  | 0.26   | 79.4 | 12.0 | 20.1 | 7.6   | 20.6 | 6.5   | 2.1    | 1.6   | 214                      | 13                                | 0.06                                 | 0.25                                    |
| BC13-19-1 | Deep    | BC13     | 104                                               | 88.2  | 6.90    | 1.81   | 0.00 | 0.18           | 2.00    | 0.73   | 0.18  | 0.00   | 73.7 | 13.4 | 18.1 | 6.9   | 26.3 | 10.3  | 0.2    | 0.9   | 368                      | 31                                | 0.08                                 | 0.29                                    |
| BC13-19-2 | Deep    | BC13     | 104                                               | 88.7  | 5.86    | 2.60   | 0.00 | 0.22           | 1.74    | 0.65   | 0.22  | 0.00   | 74.8 | 14.5 | 16.3 | 8.2   | 25.2 | 7.6   | 0.4    | 1.5   | 260                      | 31                                | 0.12                                 | 0.28                                    |
| BC13-19-3 | Deep    | BC13     | 105                                               | 88.5  | 6.73    | 1.25   | 0.00 | 0.00           | 2.74    | 0.50   | 0.25  | 0.00   | 76.1 | 15.0 | 17.7 | 7.7   | 23.9 | 8.0   | 0.2    | 1.5   | 144                      | 12                                | 0.08                                 | 0.27                                    |
| BC14-25-1 | Deep    | BC14     | 106                                               | 91.7  | 3.21    | 1.60   | 0.32 | 0.00           | 1.92    | 0.32   | 0.32  | 0.64   | 79.2 | 15.1 | 16.3 | 8.7   | 20.8 | 4.8   | 0.6    | 0.3   | 95                       | 5.0                               | 0.05                                 | 0.24                                    |
| BC14-25-2 | Deep    | BC14     | 106                                               | 91.1  | 3.51    | 1.17   | 0.23 | 0.00           | 2.81    | 0.47   | 0.47  | 0.23   | 79.6 | 22.0 | 14.8 | 9.4   | 20.4 | 5.2   | 0.9    | 2.6   | 152                      | 14                                | 0.09                                 | 0.23                                    |
| BC14-25-3 | Deep    | BC14     | 106                                               | 93.9  | 1.52    | 0.00   | 1.52 | 0.00           | 1.52    | 0.00   | 1.52  | 0.00   | 75.8 | 12.1 | 13.6 | 12.1  | 24.2 | 4.5   | 0.0    | 0.0   | 14                       | 0                                 | 0.00                                 | 0.29                                    |
| BC15-30-1 | Deep    | BC15     | 104                                               | 89.8  | 3.79    | 3.45   | 0.52 | 0.17           | 0.86    | 0.86   | 0.17  | 0.34   | 86.0 | 8.4  | 14.7 | 3.4   | 14.0 | 3.8   | 0.9    | 0.5   | 210                      | 15                                | 0.07                                 | 0.17                                    |
| BC15-30-2 | Deep    | BC15     | 101                                               | 75.7  | 9.91    | 4.80   | 3.00 | 0.90           | 2.70    | 2.10   | 0.90  | 0.00   | 76.3 | 11.1 | 23.7 | 7.2   | 23.7 | 4.5   | 3.3    | 2.1   | 224                      | 10                                | 0.04                                 | 0.25                                    |
| BC15-30-3 | Deep    | BC15     | 104                                               | 85.7  | 5.71    | 2.86   | 0.00 | 0.00           | 5.71    | 0.00   | 0.00  | 0.00   | 100  | 11.4 | 17.1 | 0     | 0    | 0     | 0      | 2.9   | 6.00                     | 0                                 | 0                                    | 0                                       |

Abbreviations: Condensed hydrocarbon (ConiHC), Carbohydrates (Carb), Unsaturated hydrocarbon (UnsatHC)

Table S5 Regression of WEOC and CHCl3 fraction compound classes with specific conductivity  
Regression of WEOC compound classes with specific conductivity

| Shallow     | R2     | P        | Deep       | R2      | P        |
|-------------|--------|----------|------------|---------|----------|
| AminoSugars | 0.5539 | 0.000101 | AminoSugar | 0.06437 | 0.729993 |
| Carb        | 0.4767 | 0.001293 | Carb       | 0.03364 | 0.5134   |
| ConcHC      | 0.773  | 2.05E-06 | ConcHC     | 0.0456  | 0.6321   |
| Lignin      | 0.4356 | 0.00235  | Lignin     | 0.05919 | 0.8258   |
| Lipid       | 0.7203 | 1.01E-05 | Lipid      | 0.05361 | 0.718101 |
| Other       | 0.5287 | 0.000568 | Other      | 0.06515 | 0.1588   |
| Protein     | 0.6135 | 0.000121 | Protein    | 0.0627  | 0.9371   |
| Tannin      | 0.4701 | 0.001427 | Tannin     | 0.03662 | 0.5034   |
| UnsatHC     | 0.6035 | 0.000148 | UnsatHC    | 0.05848 | 0.8085   |

Regression of CHCl3 fraction compound classes with specific conductivity

| Shallow     | R2      | P       | Deep       | R2      | P       |
|-------------|---------|---------|------------|---------|---------|
| AminoSugars | 0.01224 | 0.2875  | AminoSugar | 0.00245 | 0.4029  |
| Carb        | 0.0654  | 0.663   | Carb       | 0.0564  | 0.70386 |
| ConcHC      | 0.0788  | 0.947   | ConcHC     | 0.07725 | 0.1391  |
| Lignin      | 0.003   | 0.3429  | Lignin     | 0.07082 | 0.14924 |
| Lipid       | 0.1854  | 0.0423  | Lipid      | 0.06781 | 0.9069  |
| Other       | 0.0666  | 0.1563  | Other      | 0.1157  | 0.09143 |
| Protein     | 0.2402  | 0.02254 | Protein    | 0.06499 | 0.1468  |
| Tannin      | 0.07467 | 0.1431  | Tannin     | 0.02427 | 0.2503  |
| UnsatHC     | 0.1154  | 0.09176 | UnsatHC    | 0.00544 | 0.3552  |
